# Supplementary material
Source: PubMed Central journal article supplement (PMC10570913)

## Supplemental Online Content

Raasveld SJ, de Bruin S, Reuland MC, et al; InPUT Study Group. Red blood cell transfusion in the intensive care unit. *JAMA*. doi:10.1001/jama.2023.20737

**eTable 1.** Steering Committee

**eTable 2.** National Coordinators

**eTable 3.** Participating Centers

**eTable 4.** Inclusion Weeks

**eMethods 1.** Data Cleaning, Missing Data Patterns and Prerequisites

**eTable 5.** Missing Data Frequencies in Cleaned Dataset, Stratified per Continent

**eFigure 1.** Flowchart

**eTable 6.** Details Participating Countries

**eTable 7.** Patient Outcomes Stratified by Transfusion Status

**eTable 8.** Post-Surgical vs. Non-Post-Surgical Patients

**eFigure 2.** Absolute Count and Proportion Receiving an RBC Transfusion per Admission Day

**eTable 9.** Daily + Transfusion Details per Continent

**eTable 10.** Transfusion Events per Continent

**eFigure 3.** Reasons and Triggers per Continent

**eFigure 4.** Hemoglobin Before Transfusion in Transfused Patients, by Continent

**eTable 11.** Transfusion Reasons + Triggers as Stratified per Threshold

**eFigure 5.** Reasons and Triggers per Threshold

**eMethods 2.** Predefined Sub-questions and Secondary Analyses

This supplemental material has been provided by the authors to give readers additional information about their work.

**eTable 1. Steering committee**

| <b>Name</b>       | <b>Affiliation</b>                                                                                                                                                                                                                                                                                                    |
|-------------------|-----------------------------------------------------------------------------------------------------------------------------------------------------------------------------------------------------------------------------------------------------------------------------------------------------------------------|
| Cécile Aubron     | Médecine Intensive Réanimation, CHU de Brest, Université de Bretagne Occidentale, Brest, France                                                                                                                                                                                                                       |
| Jan Bakker        | Department of Pulmonary and Critical Care, New York University and Columbia University New York, New York City, United States of America<br>Department of Intensive Care Adults, Erasmus Medical Centers, Rotterdam, the Netherlands<br>Department of Intensive Care, Pontificia Universidad Católica de Chile, Chile |
| Sanne de Bruin    | Department of Intensive Care, Amsterdam University Medical Centers, Amsterdam, the Netherlands                                                                                                                                                                                                                        |
| Maurizio Cecconi  | Department of Anesthesiology and Intensive Care, IRCCS Humanitas Research Hospital, Milan, Italy                                                                                                                                                                                                                      |
| Aarne Feldheiser  | Department of Anaesthesiology, Intensive Care Medicine and Pain Therapy, Evang. Kliniken Essen-Mitte, Huysens-Stiftung/Knappschaft                                                                                                                                                                                    |
| Harm-Jan de Groot | Department of Intensive Care, Amsterdam University Medical Centers, Amsterdam, the Netherlands                                                                                                                                                                                                                        |
| Zoe McQuilten     | School of Public Health and Preventive Medicine, Monash University, Melbourne, Australia                                                                                                                                                                                                                              |
| Jens Meier        | Department of Anesthesiology and Intensive Care, Kepler University Clinic, Linz, Austria                                                                                                                                                                                                                              |
| Marcella Müller   | Department of Intensive Care, Amsterdam University Medical Centers, Amsterdam, the Netherlands                                                                                                                                                                                                                        |
| Jorinde Raasveld  | Department of Intensive Care, Amsterdam University Medical Centers, Amsterdam, the Netherlands                                                                                                                                                                                                                        |
| Thomas Scheeren   | Department of Anesthesiology, University Medical Center Groningen, Groningen, the Netherlands                                                                                                                                                                                                                         |
| Alexander Vlaar   | Department of Intensive Care, Amsterdam University Medical Centers, Amsterdam, the Netherlands                                                                                                                                                                                                                        |

**eTable 2. National coordinators (Alphabetical order)**

| Country               | Name                                                   | Affiliation                                                                                                                                                                                                                                                                                                                                                                                    |
|-----------------------|--------------------------------------------------------|------------------------------------------------------------------------------------------------------------------------------------------------------------------------------------------------------------------------------------------------------------------------------------------------------------------------------------------------------------------------------------------------|
| Australia/New Zealand | 1, Zoe McQuilten<br>2, Andrew Flint                    | 1, School of Public Health and Preventive Medicine, Monash University, Melbourne, Australia<br>2, Transfusion Research Unit, Department of Epidemiology and Preventive Medicine, Monash University, Melbourne, Australia<br>The Australian and New Zealand Intensive Care Research Centre (ANZIC-RC), School of Public Health and Preventive Medicine, Monash University, Melbourne, Australia |
| Bangladesh            | Tarikul Hamid                                          | Asgar Ali Hospital, Dhaka, Bangladesh                                                                                                                                                                                                                                                                                                                                                          |
| Belgium               | Michael Piagnerelli                                    | Department of Intensive Care, CHU Charleroi Marie Curie, Charleroi, Belgium                                                                                                                                                                                                                                                                                                                    |
| Croatia               | Tina Tomić Mahečić                                     | Department of Anesthesiology and Intensive Care. University Clinical Hospital Center Zagreb, Croatia                                                                                                                                                                                                                                                                                           |
| Czech Republic        | Jan Benes                                              | Department of Anesthesiology and Intensive Care Medicine, University hospital and Faculty of Medicine in Plzen - Charles University, Czech Republic                                                                                                                                                                                                                                            |
| Denmark               | Lene Russell                                           | Department of Intensive Care, Rigshospitalet, Copenhagen, Denmark<br>Dept. of Anaesthesia and Intensive Care Medicine, Copenhagen University Hospital - Gentofte, Hellerup, Denmark                                                                                                                                                                                                            |
| Ecuador               | Hernan Aguirre-Bermeo                                  | Unidad de Cuidados Intensivos, Hospital Vicente Corral Moscoso, Cuenca, Ecuador                                                                                                                                                                                                                                                                                                                |
| Egypt                 | <i>No national coordinator</i>                         |                                                                                                                                                                                                                                                                                                                                                                                                |
| France                | Cécile Aubron                                          | Médecine Intensive Réanimation, CHU de Brest, Université de Bretagne Occidentale, Brest, France                                                                                                                                                                                                                                                                                                |
| Greece                | 1, Konstantina Triantafyllou<br>2, Vasiliki Chantziara | 1, Department of Intensive Care, Department of Cardiothoracic Surgery, Interbalkan Medical Center, Thessaloniki, Greece<br>2, Dept of Respiratory medicine, University of Athens, Hospital for Chest Diseases, Sotiria, Greece                                                                                                                                                                 |
| India                 | 1, Mohan Gurjar<br><br>2, Sheila Nainan Myatra         | 1, Department of Critical Care Medicine, Sanjay Gandhi Postgraduate Institute of Medical Sciences (SGPGIMS), Lucknow, India<br>2, Department of Anesthesiology, Critical Care and Pain, Tata Memorial Hospital, Homi Bhabha National Institute, Mumbai, India                                                                                                                                  |
| Iran                  | <i>No national coordinator</i>                         |                                                                                                                                                                                                                                                                                                                                                                                                |
| Iraq                  | <i>No national coordinator</i>                         |                                                                                                                                                                                                                                                                                                                                                                                                |
| Italy                 | Vincenzo Pota                                          | Dept. Of Women, Child, General and Specialistic Surgery. University of Campania "L. Vanvitelli", Naples, Italy                                                                                                                                                                                                                                                                                 |
| Libya                 | Muhammed Elhadi                                        | Faculty of Medicine, University of Tripoli, Tripoli, Libya                                                                                                                                                                                                                                                                                                                                     |
| Morocco               | <i>No national coordinator</i>                         |                                                                                                                                                                                                                                                                                                                                                                                                |
| Poland                | Ryszard Gawda                                          | Department of Anesthesiology and Intensive Care, Institute of Medical Sciences, University of Opole, Poland                                                                                                                                                                                                                                                                                    |
| Portugal              | Mafalda Mourisco                                       | Intensive Care Medicine Department, Centro Hospitalar de Entre o Douro e Vouga, Santa Maria da Feira, Portugal                                                                                                                                                                                                                                                                                 |
| Qatar                 | Marcus Lance                                           | Department of Anesthesiology, Aga Khan University Nairobi, Kenya                                                                                                                                                                                                                                                                                                                               |
| Serbia                | Vojislava Neskovic                                     | Dept. of Anesthesia and intensive Care, Military Medical Academy Belgrade, Serbia                                                                                                                                                                                                                                                                                                              |
| Slovenia              | Matej Podbregar                                        | Medical ICU, General Hospital Celje<br>Department for Internal Medicine, University of Ljubljana, Ljubljana, Slovenia                                                                                                                                                                                                                                                                          |

| <b>Country</b>  | <b>Name</b>                                | <b>Affiliation</b>                                                                                                                                                                                                                                                                     |
|-----------------|--------------------------------------------|----------------------------------------------------------------------------------------------------------------------------------------------------------------------------------------------------------------------------------------------------------------------------------------|
| Spain           | 1, Juan V. Llau<br>2, Manuel Quintana-Diaz | 1, Chief of the department of anaesthesiology and post-surgical critical care, University Hospital Doctor Peset - Valencia, Spain<br>Associated Professor of Anaesthesiology. University of Valencia, Spain<br>2, Intensive Care Service, Hospital Universitario La Paz, Madrid, Spain |
| Sweden          | Maria Cronhjort                            | Karolinska Institutet, Department of Clinical Science and Education, Södersjukhuset, Sweden                                                                                                                                                                                            |
| Switzerland     | Carmen Pfortmüller                         | Department of Intensive Care, Inselspital, Bern University Hospital and University of Bern, Bern, Switzerland                                                                                                                                                                          |
| the Netherlands | Jorinde Raasveld<br>Sanne de Bruin         | Dept. of Intensive Care, Amsterdam University Medical Centers, Amsterdam, the Netherlands                                                                                                                                                                                              |
| Turkey          | Nihan Yapici                               | Department of Anesthesiology and Reanimation, Dr. Siyami Ersek Thoracic and Cardiovascular Surgery Center, University of Health Sciences, Istanbul, Turkey                                                                                                                             |
| Ukraine         | <i>No national coordinator</i>             |                                                                                                                                                                                                                                                                                        |
| United Kingdom  | Akshay Shah                                | Nuffield Department of Clinical Neurosciences, University of Oxford, Oxford, UK                                                                                                                                                                                                        |
| United States   | Nathan Nielsen                             | Division of Pulmonary, Critical Care and Sleep Medicine, University of New Mexico School of Medicine<br>Section of Transfusion Medicine and Therapeutic Pathology, University of New Mexico School of Medicine                                                                         |

**eTable 3. Participating centers**

| Country   | Hospital Name                    | Surname       | Name      | Affiliation                                                                                                                                                                                                                                                         | Address primary affiliation            |
|-----------|----------------------------------|---------------|-----------|---------------------------------------------------------------------------------------------------------------------------------------------------------------------------------------------------------------------------------------------------------------------|----------------------------------------|
| Australia | Monash University                | Higgins       | Alisa     | Australian and New Zealand Intensive Care Research Centre, School of Public Health and Preventive Medicine, Monash University                                                                                                                                       | 553 St Kilda Rd, Melbourne 3004        |
| Australia | Monash University                | Serpa Neto    | Ary       | Australian and New Zealand Intensive Care Research Centre, School of Public Health and Preventive Medicine, Monash University                                                                                                                                       | Prahran, Victoria, Australia 3004      |
| Australia | Monash University                | Flint         | Andrew    | Transfusion Research Unit, School of Public Health and Preventive Medicine, Monash University<br>The Australian and New Zealand Intensive Care Research Centre (ANZIC-RC), School of Public Health and Preventive Medicine, Monash University, Melbourne, Australia | Melbourne, Victoria, Australia 3004    |
| Australia | Monash University                | Brady         | Karina    | Transfusion Research Unit, School of Public Health and Preventive Medicine, Monash University                                                                                                                                                                       | Melbourne, Victoria, Australia 3004    |
| Australia | Monash University                | McQuilten     | Zoe       | Transfusion Research Unit, School of Public Health and Preventive Medicine, Monash University                                                                                                                                                                       | Melbourne, Victoria, Australia 3004    |
| Australia | Monash University                | Wood          | Erica     | School of Public Health and Preventive Medicine, Monash University                                                                                                                                                                                                  | Victoria, Australia                    |
| Australia | Monash University                | Poole         | Alexis    | Australian and New Zealand Intensive Care Research Centre, School of Public Health and Preventive Medicine, Monash University                                                                                                                                       | Prahran, Victoria, Australia 3004      |
| Australia | Monash University                | Trapani       | Tony      | Australian and New Zealand Intensive Care Research Centre (ANZIC-RC), School of Public Health and Preventative Medicine, Monash University,                                                                                                                         | Melbourne, Victoria, Australia         |
| Australia | Alfred hospital                  | Young         | Meredith  | Alfred Health                                                                                                                                                                                                                                                       | Melbourne, Victoria, Australia 3004    |
| Australia | Alfred hospital                  | Cooper        | Jamie     | Alfred Health                                                                                                                                                                                                                                                       |                                        |
| Australia | Alice Springs Hospital           | Secombe       | Paul      |                                                                                                                                                                                                                                                                     |                                        |
| Australia | Blacktown Hospital               | Reece         | Graham    |                                                                                                                                                                                                                                                                     |                                        |
| Australia | Caboolture Hospital              | Marella       | Prashanti | Intensive Care Department                                                                                                                                                                                                                                           | Caboolture, Queensland, Australia 4510 |
| Australia | Cabrini Hospital                 | Brewster      | David     | Cabrini Health                                                                                                                                                                                                                                                      | Malvern, Victoria, Australia 3144      |
| Australia | Calvary Mater Newcastle Hospital | Rashid        | Alan      | Calvary Mater                                                                                                                                                                                                                                                       | Waratah NSW 2298                       |
| Australia | Canberra Hospital                | Suwandarathne | Ruwan     | Australian National University                                                                                                                                                                                                                                      | Canberra, Australia                    |
| Australia | Coffs Harbour Health Campus      | Azad          | Raman     |                                                                                                                                                                                                                                                                     |                                        |
| Australia | Epworth Richmond                 | Barrett       | Jonathan  | Epworth HealthCare                                                                                                                                                                                                                                                  | Richmond, Victoria, Australia 3121     |

| Country    | Hospital Name                        | Surname     | Name         | Affiliation                                  | Address primary affiliation                                                                       |
|------------|--------------------------------------|-------------|--------------|----------------------------------------------|---------------------------------------------------------------------------------------------------|
| Australia  | Gosford Hospital                     | Turner      | Elisha       |                                              |                                                                                                   |
| Australia  | John Hunter                          | Poulter     | Amber-Louise |                                              |                                                                                                   |
| Australia  | Launceston General Hospital          | Chen        | Lixian       | Launceston General Hospital                  | 274-280 Charles St, Launceston TAS 7250                                                           |
| Australia  | Lyell McEwin Hospital                | Biradar     | Vishwanath   | SA Health Lyell McEwin Hospital              | Elizabeth Vale SA 5112                                                                            |
| Australia  | Nepean Hospital                      | Whitehead   | Christina    | Nepean Hospital                              | Kingswood, NSW, Australia 2747                                                                    |
| Australia  | Queen Elizabeth Hospital             | Peake       | Sandra       | The Queen Elizabeth Hospital                 | Woodville South, South Australia, Australia 5011                                                  |
| Australia  | Redcliffe hospital                   | Tabah       | Alexis       | Intensive Care Department                    | Redcliffe Queensland Australia 4020                                                               |
| Australia  | Royal Adelaide Hospital              | O'Connor    | Stephanie    | Royal Adelaide Hospital                      | Port Rd, Adelaide, SA 5000                                                                        |
| Australia  | Royal Brisbane and Womens Hospital   | Reade       | Michael      |                                              |                                                                                                   |
| Australia  | Royal Darwin Hospital                | Janssen     | Guido        | Royal Darwin Hospital                        | Tiwi, Northern Territory, Australia 0810                                                          |
| Australia  | Royal Hobart Hospital                | McAllister  | Richard      | Royal Hobart Hospital                        | Hobart, Tasmania, Australia 7000                                                                  |
| Australia  | Royal Prince Alfred                  | Triplett    | Katherine    | The Royal Prince Alfred Hospital             | Camperdown, New South Wales, Australia 2050                                                       |
| Australia  | Ryde Hospital                        | Bowen       | David        |                                              |                                                                                                   |
| Australia  | St Vincent Hospital - Sydney         | Buscher     | Hergen       | St Vincent's Hospital, Sydney                | Darlinghurst, NSW                                                                                 |
| Australia  | St Vincent Hospital - Melbourne      | Santamaria  | John         | St Vincent's Hospital Melbourne              |                                                                                                   |
| Australia  | The Prince Charles Hospital          | Parmar      | Dinesh       | The Prince Charles Hospital                  | Chermside, QLD 4035                                                                               |
| Australia  | University Geelong Hospital          | Power       | Paul         | Barwon Health, University Hospital Geelong   | Geelong, VIC 3220                                                                                 |
| Australia  | Western Health                       | French      | Craig        | Department of Intensive Care, Western Health | Footscray, Victoria, Australia, 3011                                                              |
| Australia  | Westmead Hospital                    | Bowen       | David        |                                              |                                                                                                   |
| Australia  | Wollongong ICU                       | Mac Partlin | Matthew      | Wollongong ICU                               | Loftus Street, Wollongong, NSW 2500                                                               |
| Australia  | Wyong Hospital                       | Bowen       | David        |                                              |                                                                                                   |
| Bangladesh | Asgar Ali Hospital                   | Tarikul     | Hamid        | Bangabandhu Sheikh Mujib Medical University  | Shah Bag, Dhaka, Bangladesh                                                                       |
| Bangladesh | Ibn Sina Medical College Hospital    | Islam       | Md Motiul    | Bangabandhu Sheikh Mujib Medical University  | Shah Bag, Dhaka, Bangladesh                                                                       |
| Bangladesh | Central Police Hospital              | Haque       | Injamam Ull  | Bangabandhu Sheikh Mujib Medical University  | Shah Bag, Dhaka, Bangladesh                                                                       |
| Belgium    | CHU St Pierre, Brussels              | Roman       | Alain        | CHU-St Pierre.                               | Université Libre de Bruxelles. 322, rue Haute. 1000 Bruxelles. Belgium                            |
| Belgium    | CHU Charleroi Marie Curie, Charleroi | Piagnerelli | Michael      | Intensive Care.                              | CHU-Charleroi. Université Libre de Bruxelles. 140, chaussée de Bruxelles. 6042-Charleroi. Belgium |

| Country           | Hospital Name                                                 | Surname             | Name                | Affiliation                                                                                                                                                                                                                                                                                     | Address primary affiliation                                     |
|-------------------|---------------------------------------------------------------|---------------------|---------------------|-------------------------------------------------------------------------------------------------------------------------------------------------------------------------------------------------------------------------------------------------------------------------------------------------|-----------------------------------------------------------------|
| Belgium           | CHU Mons a Paré                                               | Haentjens           | Lionel              | CHU Ambroise Paré                                                                                                                                                                                                                                                                               | Boulevard Kennedy, 2, 7000 Mons                                 |
| Croatia           | kbc zagreb                                                    | Tomić<br>Mahečić    | Tina                | Department of Anesthesiology and Intensive Care. University<br>Clinical Hospital Center Zagreb                                                                                                                                                                                                  | Kispaticeva 12, 10 000 Zagreb                                   |
| Croatia           | kbc zagreb                                                    | Ikic                | Višnja              | UHC Osijek                                                                                                                                                                                                                                                                                      | Krstova ulica 92,Osijek                                         |
| Croatia           | UHC Osijek                                                    | Kvolik              | Slavica             | UHC Osijek                                                                                                                                                                                                                                                                                      | Krstova ulica 92,Osijek                                         |
| Croatia           | UHC Zagreb                                                    | Bojčić              | Robert              | UHC Zagreb                                                                                                                                                                                                                                                                                      | Kišpatićeva 12,Zagreb                                           |
| Croatia           | UH Rijeka                                                     | Juričić             | Kazimir             | KBC Rijeka                                                                                                                                                                                                                                                                                      | Krešimirova ulica 92,Rijeka                                     |
| Czech<br>Republic |                                                               | Benes               | Jan                 | 1 Dpt. of Anesthesiology and Intensive Care Medicine, Faculty of<br>Medicine in Plzen, Charles University, Plzen, Czech Republic<br>2 Department of Anesthesiology and Intensive Care Medicine,<br>University hospital and Faculty of Medicine in Plzen - Charles<br>University, Czech Republic |                                                                 |
| Czech<br>Republic | University Hospital Ostrava                                   | Duksa               | Martin              | Dpt. of Anesthesiology and Intensive Care Medicine, University<br>Hospital Ostrava                                                                                                                                                                                                              | 17. listopadu 1790/5; 708 52 Ostrava-<br>Poruba                 |
| Czech<br>Republic | Institute for Clinical and<br>Experimental Medicine<br>Prague | Bílek               | Lukáš               | Dpt. Of Anesthesiology and Intensive Care Medicine, Institute of<br>clinical and experimental medicine                                                                                                                                                                                          | Videnska 1958, Praha 4, 140 00                                  |
| Czech<br>Republic | Hospital Havírov                                              | Satinsky            | Igor                | Multidisciplinary intensive care unit, Hospital Havirov                                                                                                                                                                                                                                         | Delnicka 1132/24; 736 01 Havirov                                |
| Czech<br>Republic | FN Plzen                                                      | Zatloukal           | Jan                 | Dpt. Of Anesthesiology and Intensive Care Medicine, University<br>Hospital Plzen                                                                                                                                                                                                                | alej Svobody 80, 304 60 Plzen                                   |
| Denmark           | Rigshospitalet                                                | Russell             | Lene                | 1) Department of Intensive Care                                                                                                                                                                                                                                                                 | Blegdamsvej 9, 2100 Copenhagen                                  |
| Denmark           | Nordsjællands hospital                                        | Bestle              | Morten H.           | Department of Anaesthesiology and Intensive Care,<br>Copenhagen University Hospital - North Zealand, Hilleroed,<br>Denmark<br>Department of Clinical Medicine, University of Copenhagen,<br>Copenhagen, Denmark                                                                                 | Nordsjællands hospital, Dyrehavevej<br>29, 3400 Hillerød        |
| Denmark           | Bispeberg hospital                                            | Meyhoff             | Christian S.        | Department of Anaesthesia and Intensive Care, Copenhagen<br>University Hospital - Bispebjerg and Frederiksberg,<br>Copenhagen, Denmark                                                                                                                                                          | Bispebjerg hospital, Bispebjerg Bakke<br>23, 2400 Copenhagen NV |
| Ecuador           | Hospital Eugenio Espejo                                       | Diaz-Medina         | Ana Maria           | Unidad de Cuidados Intensivos, Hospital Eugenio Espejo, Quito.                                                                                                                                                                                                                                  | Av. Gran Colombia                                               |
| Ecuador           | Hospital Santa Ines                                           | Llumiquinga         | Verónica            | Unidad de Cuidados Intensivos, Hospital Santa Inés, Cuenca.                                                                                                                                                                                                                                     | Av. Daniel Córdova T. 2-67                                      |
| Ecuador           | Hospital Vicente Corral<br>Moscoso                            | Aguirre-<br>Bermeo  | Hernán              | Unidad de Cuidados Intensivos, Hospital Vicente Corral<br>Moscoso, Cuenca.                                                                                                                                                                                                                      | Av. del Paraíso                                                 |
| Ecuador           | Hospital General Monte<br>Sinai                               | Gonzabay-<br>Campos | Heinert<br>Enmanuel | Unidad de Cuidados Intensivos, Hospital General Monte Siani,<br>Guayaquil.                                                                                                                                                                                                                      | Av. Causarina Kilometro 7                                       |
| Egypt             | Tanta University                                              | Elbahnasaw<br>y     | Mohamed             | Emergency medicine and traumatology department, Tanta<br>Unversity faculty of medicine                                                                                                                                                                                                          | Tanta, ELGEISH STREET                                           |

| Country | Hospital Name                        | Surname   | Name        | Affiliation                                                                                                                                                                                                                                                                                                                   | Address primary affiliation                                                   |
|---------|--------------------------------------|-----------|-------------|-------------------------------------------------------------------------------------------------------------------------------------------------------------------------------------------------------------------------------------------------------------------------------------------------------------------------------|-------------------------------------------------------------------------------|
| France  | Brest surgical unit                  | Chapalain | Xavier      | Département d'anesthésie réanimation CHU de Brest, Université de Bretagne occidentale                                                                                                                                                                                                                                         | Bvd Tanguy Prigent 29200Brest                                                 |
| France  | Brest medical unit                   | Aubron    | Cécile      | Médecine Intensive Réanimation, CHU de Brest, Université de Bretagne Occidentale                                                                                                                                                                                                                                              | Bvd Tanguy Prigent 29200Brest                                                 |
| France  | Hospital of Le Mans                  | Le Moal   | Charlène    | Réanimation, Centre Hospitalier Le Mans                                                                                                                                                                                                                                                                                       | 194 Avenue Rubillard, 72037 Le mans                                           |
| France  | Hospital of Morlaix                  | Egreteau  | Pierre-Yves | Service de Réanimation polyvalente, Centre Hospitalier des Pays de Morlaix                                                                                                                                                                                                                                                    | 15 rue de Kersaint Gilly 29600 Morlaix                                        |
| France  | Rennes Surgical ICU                  | Launey    | Yoann       | Service d'Anesthésie-Réanimation 1, Département d'Anesthésie-Réanimation et Médecine Péri-Opératoire, CHU de Rennes                                                                                                                                                                                                           | <u>2, rue Henri Le Guilloux, 35033 Rennes, France</u>                         |
| France  | Rennes Medical ICU                   | Reizine   | Florian     | services des maladies infectieuses et réanimation médicale, CHU de Rennes                                                                                                                                                                                                                                                     | <u>2, rue Henri Le Guilloux, 35033 Rennes, France</u>                         |
| France  | Teaching Hospital of Poitiers        | Boissier  | Florence    | University hospital of Poitiers, Medical Intensive Care and INSERM CIC 1402 (ALIVE group) Poitiers University                                                                                                                                                                                                                 | CHU de Poitiers, CS 90577, 86021 Poitiers Cedex                               |
| France  | Teaching Hospital of Nantes          | Jean      | Reignier    | Service de Médecine Intensive Réanimation, Centre Hospitalier Universitaire de Nantes, Nantes, France; Université de Nantes, Nantes, France                                                                                                                                                                                   |                                                                               |
| France  | Teaching Hospital of Tours           | Ehrmann   | Stephan     | Médecine Intensive Réanimation, CIC 1415 INSERM, CRICS-TriggerSep F-CRIN research network and Centre d'étude des pathologies respiratoires (CEPR), INSERM U1100, Université de Tours                                                                                                                                          | 2 Boulevard Tonnellé37044 Tours Cedex 9                                       |
| France  | Hospital of Vannes                   | Lebas     | Eddy        | Réanimation Polyvalente, Centre Hospitalier Bretagne Atlantique                                                                                                                                                                                                                                                               | 20, boulevard du Gébéral Maurice Guillaudot 56017 Vannes                      |
| France  | Hospital of Toulon                   | Corno     | Gaëlle      | Réanimation polyvalente, Centre Hospitalier Intercommunal de Toulon                                                                                                                                                                                                                                                           | 54 rue Sainte-Claire Deville 83100 Toulon                                     |
| France  | hospital of Lorient                  | Cailliez  | Pauline     | Service de réanimation polyvalente, Centre Hospitalier de Bretagne Sud, CHBS                                                                                                                                                                                                                                                  | 5 Avenue Choiseul 56322 Lorient                                               |
| France  | Hospital of Jossigny                 | Garçon    | Pierre      | Service de Réanimation Polyvalente, Grand Hôpital de l'Est Francilien site de Marne-la-Vallée, Jossigny                                                                                                                                                                                                                       | 2 CRS Gondoire, 77600 Jossigny                                                |
| France  | Henri Mondor Teaching Hospital Paris | Carteaux  | Guillaume   | Assistance Publique-Hôpitaux de Paris, CHU Henri Mondor, Service de Médecine Intensive Réanimation, Créteil, F-94010 France<br>Université Paris Est-Créteil, Faculté de Santé, Groupe de Recherche Clinique CARMAS, Créteil, F-94010 France<br>INSERM U955, Institut Mondor de Recherche Biomédicale, Créteil, F-94010 France | CHU Henri Mondor, Service de Médecine Intensive Réanimation, Créteil, F-94010 |
| France  | Hospital of Nancy                    | Kimoun    | Antoine     | Université de Lorraine, CHRU de Nancy, institut Lorrain du cœur et des vaisseaux, service de médecine intensive et réanimation Brabois, INSERM U1116, Nancy, France                                                                                                                                                           | 49 rue Hermite 54 000 Nancy                                                   |



| Country | Hospital Name                                        | Surname            | Name         | Affiliation                                                                                                         | Address primary affiliation                                       |
|---------|------------------------------------------------------|--------------------|--------------|---------------------------------------------------------------------------------------------------------------------|-------------------------------------------------------------------|
| Greece  | Sotiria Chest Hospital                               | Chantziara         | Vasiliki     | ICU, 1st Dep of Respiratory Med, National and Kapodistrian Univ of Athens, "Sotiria" Chest Hospital, Athens, Greece |                                                                   |
| Greece  | Thoracic Diseases General Hospital Sotiria           | Theodoulou         | Danai        | Sotiria General Hospital, ICU                                                                                       | 152, Mesogeion Ave, 11527                                         |
| Greece  | General Military Hospital NIMTS                      | ALOIZOS            | STAVROS      | Department of Intensive Care                                                                                        | 1 V. BENSI str. ATHENS                                            |
| Greece  | University Hospital Heraklion                        | Papadakis          | Eleftherios  | Department of Intensive Care, University Hospital Heraklion                                                         | voutes Heraklion                                                  |
| Greece  | General Hospital Laiko                               | TSAKALIS           | KONSTANTINOS | Department of Critical Care Medicine, Laiko, General Hospital of Athens, Athens                                     | Agiou Thoma 17, Athens 115 27                                     |
| Greece  | General Hospital Korgialenio-Mpenakio HRC            | Marinakis          | Giorgos      | Department of Intensive Care                                                                                        | Athanasius 2, Athens                                              |
| Greece  | General Hospital Imathia                             | Georgakas          | Ioannis      | Department of Intensive Care                                                                                        | Asomata Papagou 59132, Veroia                                     |
| Greece  | General Oncologic Hospital of Kifisia Agioi Anargiri | Tripolitsioti      | Paraskevi    | Department of Intensive Care                                                                                        | Noufaron ke, Timiou Stavrou 14, Kifisia 145 64                    |
| Greece  | General Hospital Asklepieio Voulas                   | Nikolakopoulou     | Sofia        | Department of Intensive Care                                                                                        | 1, Vasileos Paulou Avenue, Voula                                  |
| Greece  | University Hospital Ioannina                         | Papathanakos       | Georgios     | Department of Intensive Care                                                                                        | Medical School, University of Ioannina, GR 45110 Ioannina, Greece |
| Greece  | Agios Savvas                                         | Sklavou            | Chrysanthi   | Department of Intensive Care                                                                                        | 152, Alexandras Av. 11522                                         |
| Greece  | Interbalkan Medical Center                           | Triantafyllopoulou | Konstantina  | Department of Intensive Care, Department of Cardiothoracic Surgery                                                  | European Interbalkan Medical Center, Thessaloniki                 |
| Greece  | General Hospital Ippokratio                          | Tsika              | Evangelia    | Department of Intensive Care                                                                                        | 114 Vasilissis Sofia's Avenue                                     |
| Greece  | General Hospital Chatzikostas                        | Mousafiri          | Ourania      | General Hospital of Ioannina Hatzikosta                                                                             | Makrigianni 1, Ioannina                                           |
| Greece  | General Hospital Tzanio                              | Prekates           | Athanasios   | Tzaneio General Hospital of Piraeus                                                                                 | Zanni and Afentouli 1                                             |
| Greece  | University Hospital Aretaieio                        | Micha              | Georgia      | Aretaieio University Hospital of Athens, National and Kapodistrian University of Athens                             | V. Sofias Anenue 76, 11528                                        |
| Greece  | General Hospital Papanikolaou                        | Lavrentieva        | Athina       | General Hospital Papanikolaou                                                                                       | Leof. Papanikolaou, 57010                                         |
| Greece  | General Hospital Agios Pavlos                        | Aslanidis          | Theodoros    | Intensive Care Unit                                                                                                 | 161 Ethnikis Antistaseos str, PC 55135                            |
| Greece  | General Panarkadic Hospital                          | Palaiologou        | Athina       | Department of Intensive Care                                                                                        | Erithrou Stavrou, 22100 Tripolis                                  |
| Greece  | Sotiria Hospital: ICU 1                              | Bostantzoglu       | Clementine   | Department of Intensive Care                                                                                        | 152, Mesogeion Ave, 11527                                         |
| Greece  | Sotiria Hospital: ICU 3                              | Dikoudi            | Evangelia    | Department of Intensive Care                                                                                        | 152, Mesogeion Ave, 11527                                         |
| Greece  | Sotiria Hospital: ICU 4                              | Karaouli           | Silia        | Department of Intensive Care                                                                                        | 152, Mesogeion Ave, 11527                                         |
| Greece  | KAA Sotiria                                          | Pouriki            | Sophia       | Department of Intensive Care                                                                                        | 152, Mesogeion Ave, 11527                                         |

| Country | Hospital Name                                                      | Surname        | Name                   | Affiliation                                                                                                                              | Address primary affiliation                                                                                   |
|---------|--------------------------------------------------------------------|----------------|------------------------|------------------------------------------------------------------------------------------------------------------------------------------|---------------------------------------------------------------------------------------------------------------|
| India   | Tata Memorial Hospital                                             | Myatra         | Sheila Nainan          | Department of Anaesthesiology, Critical Care and Pain, Tata Memorial Hospital, Homi Bhabha National Institute, Mumbai, India.            |                                                                                                               |
| India   | Tata Memorial Hospital                                             | Vijayakumar an | Swapna                 | Department of Anaesthesiology, Critical Care and Pain, Tata Memorial Hospital, Homi Bhabha National Institute                            | Tata Memorial Hospital, Mumbai, India                                                                         |
| India   | Sanjay Gandhi Postgraduate Institute of Medical Sciences (SGPGIMS) | Gurjar         | Mohan                  | Department of Critical Care Medicine, Sanjay Gandhi Postgraduate Institute of Medical Sciences (SGPGIMS)                                 | Sanjay Gandhi Postgraduate Institute of Medical Sciences (SGPGIMS), Lucknow, India                            |
| India   | Sir H N Reliance Foundation Hospital                               | Rathod         | Darshana               | Department of Critical Care Medicine, Sir H N Reliance Foundation Hospital                                                               | Sir H N Reliance Foundation Hospital, Mumbai, India                                                           |
| India   | Yashoda Hospital                                                   | KOLA           | VENKAT RAMAN           | Department of Critical Care Medicine, Yashoda Hospitals, Secunderabad                                                                    | Behind Hari Hara Kala Bhavan, S P Road, Secunderabad-500003, Telengana                                        |
| India   | Criticare Hospital and Research Institute                          | Jeswani        | Deepak                 | Criticare Hospital and Research institute.                                                                                               | Criticare Hospital and Research institute. 4th floor Dhanashree complex, near hotel Hardeo, Sitabuldi, Nagpur |
| India   | NIMHANS                                                            | Gopalakrishna  | Kadarapura Nanjundaiah | Department of Neuroanaesthesia and Neurocritical Care                                                                                    | National Institute of Mental Health and Neuro Sciences (NIMHANS), Bengaluru, India                            |
| India   | BKL WRMC                                                           | Hartalkar      | Amol                   | Professor, Department of Medicine, BKL Walawalkar Rural Medical College & Hospital, Dervan, Chiplun (Maharashtra) India, Dervan, Chiplun | Department of Medicine, BKL Walawalkar Rural Medical College & Hospital, Dervan, Chiplun (Maharashtra)        |
| Iran    | Imam Reza hospital/shohada hospital                                | Mahmoodpoor    | Ata                    | Department of Anesthesiology, Faculty of Medicine, Tabriz University of Medical Sciences                                                 | General ICU, Imam Reza hospital, Daneshkade street, Tabriz, East Azerbaijan                                   |
| Iraq    | Ghazi Al-Hariri Surgical Specialties Hospital                      | Abdulkhaleq    | Marwah                 | department of intensive care, medical city hospital                                                                                      | baghdad, Bab Al Moatham                                                                                       |
| Italy   | University of Campania                                             | Pota           | Vincenzo               | Dept. Of Women, Child, General and Specialistic Surgery. University of Campania "L. Vanvitelli"                                          | Via de Crecchio, Napoli                                                                                       |
| Italy   | Policlinico Paolo Giaccone, University of Palermo                  | Ippolito       | Mariachiara            | Department of Surgical, Oncological and Oral Science (Di.Chir.On.S.), University of Palermo, Italy.                                      | via del vespro, 129, 90127, Palermo, Italy                                                                    |
| Italy   | University Hospital of Foggia                                      | Cotoia         | Antonella              | Intensive Care Medicine                                                                                                                  |                                                                                                               |
| Italy   | Regina Elena National Cancer Institute                             | Covotta        | Marco                  | IRCCS Regina Elena National Cancer Institute                                                                                             | Via E. Chianesi 53, Rome                                                                                      |

| Country | Hospital Name                            | Surname     | Name                   | Affiliation                                                                                                                                                                                                                                                     | Address primary affiliation                                                                            |
|---------|------------------------------------------|-------------|------------------------|-----------------------------------------------------------------------------------------------------------------------------------------------------------------------------------------------------------------------------------------------------------------|--------------------------------------------------------------------------------------------------------|
| Italy   | Azienda Ospedaliera Universitaria        | Filippo     | Sanfilippo             | Department of Anesthesiology and Intensive Care, Azienda Ospedaliero Universitaria 'Policlinico-San Marco', Catania, Italy                                                                                                                                      | Via S. Sofia n 78, Postcode 95100 Catania, Italy                                                       |
| Italy   | Humanitas Research Hospital              | Cecconi     | Maurizio               | 1 Department of Biomedical Sciences, Humanitas University, Via Rita Levi Montalcini 4, 20072 Pieve Emanuele, Milan, Italy.<br>2 Department of Anesthesiology and Intensive Care, IRCCS Humanitas Research Hospital, via Manzoni 56, 20089 Rozzano, Milan, Italy | 1: Via Rita Levi Montalcini 4, 20072 Pieve Emanuele, Milan.<br>2: Via Manzoni 56, 20089 Rozzano, Milan |
| Libya   |                                          | Elhadi      | Muhammed               | Faculty of Medicine, University of Tripoli, Tripoli, Libya.                                                                                                                                                                                                     | Furnaj, University Road, 13725, Tripoli, Libya.                                                        |
| Libya   | Althawra hospital, medical ICU           | Ishteiwy    | Ehab                   | Althawra hospital, Medical Intensive Care Unit                                                                                                                                                                                                                  | Al Bayda' City                                                                                         |
| Libya   | Tripoli Central hospital, medical ICU    | Benzarti    | Hebtallah              | Medical ICU, Tripoli Central hospital                                                                                                                                                                                                                           | Elsaidi Street, Tripoli                                                                                |
| Libya   | Tobruk medical centre, medical ICU       | Bouhuwaish  | Ahmed Elmabri Mohammed | Medical ICU, Tobruk medical centre                                                                                                                                                                                                                              | Tobruk                                                                                                 |
| Libya   | Sabha Medical Center                     | Abdalhadi   | Alya                   | Sebha Medical Center                                                                                                                                                                                                                                            | Sebha                                                                                                  |
| Libya   | Aljalla Benghazi Hospital, surgical ICU  | Buimsaedah  | Ahmad                  | Surgical ICU, Aljalla Benghazi Hospital                                                                                                                                                                                                                         | Benghazi                                                                                               |
| Libya   | Tripoli Central Hospital, trauma ICU     | Abdulwahed  | Eman Ali               | Trauma ICU, Tripoli Central Hospital                                                                                                                                                                                                                            | Elsaidi Street, Tripoli                                                                                |
| Libya   | Aljalla Benghazi Hospital, medical ICU   | Tamoos      | Khalil                 | Medical ICU, Aljalla Benghazi Hospital                                                                                                                                                                                                                          | Benghazi                                                                                               |
| Libya   | Al-Zawia Teaching Hospital               | Younes      | Eman                   | Al-Zawia Teaching Hospital                                                                                                                                                                                                                                      | Al-Zawia                                                                                               |
| Libya   | Sabratha Teaching Hospital, medical ICU  | Alkamkhe    | Asma Abubakr Saleh     | Medical ICU, Sabratha Teaching Hospital                                                                                                                                                                                                                         | Sabratha                                                                                               |
| Libya   | Tripoli Central Hospital, surgical ICU   | Biala       | Marwa                  | Surgical ICU, Tripoli Central Hospital                                                                                                                                                                                                                          | Elsaidi Street, Tripoli                                                                                |
| Libya   | Medical Misurata Center                  | Hwili       | Hajer Abdalla Mohammed | Medical Misurata Center                                                                                                                                                                                                                                         | Misurata                                                                                               |
| Libya   | Zliten medical center, medical ICU       | Ben Hasan   | Najat Shaban           | Zliten Medical Centre                                                                                                                                                                                                                                           | Sea Street, Zliten                                                                                     |
| Libya   | Shaima Clinic - Janzour, medical ICU     | Almiqlash   | Bushray Alhadi         | Medical ICU, Shaima Clinic                                                                                                                                                                                                                                      | Janzour, Tripoli                                                                                       |
| Libya   | AboSleem Hospital; trauma                | Altair      | Mawadda                | Trauma ICU, AboSleem Hospital                                                                                                                                                                                                                                   | AboSleem, Tripoli                                                                                      |
| Libya   | Alkhadra Hospital Tripoli; medical       | Otman       | Rema                   | Intensive Care Unit, Alkhadra Hospital Tripoli                                                                                                                                                                                                                  | AboSleem, Tripoli                                                                                      |
| Libya   | Benghazi Medical Center; surgical/trauma | Al Gharyani | Mohamed Fathi          | Surgical and Trauma ICU, Benghazi Medical Center                                                                                                                                                                                                                | Benghazi                                                                                               |
| Libya   | El Maqarif Hospital Agdabia              | Alkeelani   | Omlez Mohammed         | El Maqarif Hospital                                                                                                                                                                                                                                             | Agdabia                                                                                                |

| Country     | Hospital Name                                                    | Surname              | Name         | Affiliation                                                                                                 | Address primary affiliation                                                                               |
|-------------|------------------------------------------------------------------|----------------------|--------------|-------------------------------------------------------------------------------------------------------------|-----------------------------------------------------------------------------------------------------------|
| Libya       | Gheryan Central Hospital                                         | Bakeer               | Hibah        | Gheryan Central Hospital                                                                                    | Gheryan                                                                                                   |
| Libya       | Misurata Medical Center; medical                                 | Omar Affat           | Azah Mukhtar | Medical ICU, Misurata Medical Center                                                                        | Misurata                                                                                                  |
| Libya       | Misurata Medical Center; surgical                                | Aween                | Husayn       | Surgical ICU, Misurata Medical Center                                                                       | Misurata                                                                                                  |
| Libya       | National Cancer Institution Misurata                             | Benamwor             | Aihab        | Intensive Care Unit, National Cancer Institute Misurata                                                     | Misurata                                                                                                  |
| Libya       | Tripoli Medical Center; cardiac                                  | Alsori               | Mohamed      | Cardiac ICU, Tripoli Medical Center (Tripoli University Hospital)                                           | Furnaj, University Road, Tripoli                                                                          |
| Libya       | Ibn sina hospital                                                | Abdelrahim           | Najwa        | Medical ICU, Ibn Sina Hospital                                                                              | Sirt                                                                                                      |
| Marocco     | faculty of medicine and pharmacy of Rabat, Mohammed V university | Abdelilah            | GHANNAM      | Université Mohammed V de Rabat, Centre Hospitalo-Universitaire Ibn Sina de Rabat                            | Institut National d'Oncologie, Avenue Allal Al Fassi, Rabat                                               |
| New Zealand | Auckland City Hospital CVICU                                     | Parke                | Rachael      | Cardiothoracic and Vascular ICU, Auckland City Hospital                                                     | Auckland, New Zealand                                                                                     |
| New Zealand | Auckland district Health board DCCM                              | Chen                 | Yan          | Department of Critical Care Medicine, Auckland City Hospital                                                | Park Road, Grafton, Auckland, New Zealand 1023                                                            |
| New Zealand | Christchurch Hospital                                            | Mehrtens             | Jan          | Canterbury District Health Board                                                                            | Department of Intensive Care Medicine Christchurch Hospital, Riccarton Ave, Christchurch New Zealand 8011 |
| New Zealand | Dunedin Hospital                                                 | Twardowski           | Pawel        | Department of Surgical Sciences, Otago Medical School                                                       | 201 Great King St, Dunedin 9016, New Zealand                                                              |
| New Zealand | Hawke's Bay Hospital                                             | Freebairn            | Ross         |                                                                                                             |                                                                                                           |
| New Zealand | Middlemore Hospital                                              | Song                 | Rima         |                                                                                                             |                                                                                                           |
| New Zealand | North shore hospital                                             | North Shore Hospital | Gibson       |                                                                                                             | NORTH SHORE HOSPITAL, AUCKLAND, NZ                                                                        |
| New Zealand | Tauranga Hospital                                                | Chen                 | Jonathan     | Te Whatu Ora Health New Zealand, Hauora a Toi Bay of Plenty                                                 | Tauranga, New Zealand 3112                                                                                |
| New Zealand | Waikato Hospital                                                 | Moore                | Richard      | Waikato Hospital Intensive Care                                                                             | 183 Pembroke Street, Waikato Hospital, Hamilton, 3204                                                     |
| New Zealand | Wellington Hospital                                              | Sol Cruz             | Mary Rose    | CCDHB INTENSIVE CARE UNIT                                                                                   | RIDDIFORD STREET NEWTOWN WELLINGTON 6021                                                                  |
| Poland      |                                                                  | Gawda                | Ryszard      | Department of Anesthesiology and Intensive Care, Institute of Medical Sciences, University of Opole, Poland |                                                                                                           |
| Poland      | Wojskowy Szpital Kliniczny z Poliklinika w Krakowie              | Wludarczyk           | Anna         | Department of Intensive Care and Perioperative Medicine, Jagiellonian University Medical                    | ul. Wroclawska 1-3, 30-901 Krakow, Poland                                                                 |
| Poland      | Central University Hospital                                      | Krzych               | Łukasz       | Department of Anesthesiology and Intensive Care, Medical University of Silesia, Katowice, Poland            | Central University Hospital, 14 Medykow Str., 40752 Katowice, Poland                                      |
| Poland      | Medical University of Lublin                                     | Szczukocka           | Marta        | 2nd Department of Anesthesiology and Intensive Care, Medical University of Lublin, Lublin, Poland           | Staszica 16, 20-081 Publin, Poland                                                                        |

| Country  | Hospital Name                                              | Surname          | Name      | Affiliation                                                                                                             | Address primary affiliation                            |
|----------|------------------------------------------------------------|------------------|-----------|-------------------------------------------------------------------------------------------------------------------------|--------------------------------------------------------|
| Poland   | Szpital Wojewodzki w Opolu                                 | Kubiak           | Marcin    | Oddzial Anestezjologii i Intensywnej Terapii, Szpital Wojewodzki w Opolu                                                | ul. Kosnego 53, 46-020 Opole, Poland                   |
| Poland   | Uniwersytecki Szpital Kliniczny w Opolu                    | Molsa            | Maciej    | Department of Anesthesiology and Intensive Care, Institute of Medical Sciences, University of Opole                     | al. Witosa 26, 45-401 Opole, Poland                    |
| Poland   | University Clinical Centre, Medical University of Gdansk   | Wujtewicz        | Magdalena | Department of Anaesthesiology and Intensive Therapy , Faculty of Medicine, Medical University of Gdansk, Gdansk, Poland | Smoluchowskiego 17, 80-214 Gdansk, Poland              |
| Poland   | Wojskowy Szpital Kliniczny z Poliklinika                   | Wieczorek        | Agnieszka | Kliniczny Oddzial Anestezjologii i Intensywnej Terapii, 4 Wojskowy Szpital Kliniczny z Poliklinika SP ZOZ               | Weigla 5, 50-981 Wroclaw, Poland                       |
| Poland   | Szpital Slaski w Cieszynie                                 | Misiewska-Kaczur | Agnieszka | Oddzial Anestezjologii i Intensywnej Terapii, Szpital Slaski w Cieszynie                                                | ul. Bielska 4, 43-400 Cieszyn, Poland                  |
| Poland   | Wielospecjalistyczny Szpital SPZOZ w Nowej Soli            | Maslicki         | Marek     | Oddzial Anestezjologii i Intensywnej Terapii, Wielospecjalistyczny Szpital SP ZOZ w Nowej Soli                          | ul. Chalubinskiego 7, 67-100 Nowa Sol, Poland          |
| Poland   | Wojewodzki Szpital Specjalistyczny w Olsztynie             | Onichimowski     | Dariusz   | University of Warmia and Mazury in Olsztyn Collegium Medicum Department of Anaesthesiology and Intensive Care           | Warszawska 30, 11-041 Olsztyn, Poland                  |
| Poland   | Szpital Wojewodzki w Bielsku-Bialej                        | Mazur            | Jakub     | Oddzial Anestezjologii i Intensywnej Terapii, Szpital Wojewodzki w Bielsku-Bialej                                       | al. Armii Krajowej 101, 43-316 Bielsko-Biala, Poland   |
| Poland   | University Clinical Center of Medical University of Warsaw | Zatorski         | Pawel     | I Department of Anaesthesiology and Intensive Care                                                                      | 4 Lindleya Street, 02-005 Warsaw, Poland               |
| Portugal | Centro Hospitalar de Entre o Douro e Vouga                 | Mourisco         | Mafalda   | Intensive Care Medicine Department, Centro Hospitalar de Entre o Douro e Vouga                                          | Rua Dr. Cândido Pinho 5, 4520-211 Santa Maria da Feira |
| Portugal | Hospital Central do Funchal, Madeira                       | Mota             | Ana Marta | Intensive Care Medicine Department, Hospital Central do Funchal                                                         | Av. Luís de Camões 6180, 9000-177 Funchal              |
| Portugal | Centro Hospitalar e Universitário de São João              | Fernandes        | Joana     | Intensive Care Medicine Department, Centro Hospitalar e Universitário de São João                                       | Alameda Prof. Hernâni Monteiro, 4200-319 Porto         |
| Portugal | Centro Hospitalar de Leiria                                | Castro           | Diana     | Intensive Care Medicine Department, Centro Hospitalar de Leiria - Hospital de Santo André                               | R. de Santo André, 2410-197 Leiria                     |
| Portugal | Hospital de Braga                                          | Coelho           | Elisabete | Intensive Care Medicine Department, Hospital de Braga                                                                   | R. das Comunidades Lusíadas 133, Braga                 |
| Portugal | Unidade de Saude Local do Baixo Alentejo                   | Paula            | Alexandra | Intensive Care Medicine Department, Unidade Local de Saúde do Baixo Alentejo, Hospital José Joaquim Fernandes           | R. Dr. Antonio Fernando Covas Lima, 7801-849 Beja      |
| Portugal | Centro Hospitalar Tamega e Sousa                           | Guimarães        | Teresa    | Intensive Care Medicine Department, Centro Hospitalar Tâmega e Sousa                                                    | Avenida do Hospital Padre Américo 210, 4564-007        |
| Portugal | Centro Hospitalar de Vila Nova de Gaia/Espinho             | Adrião           | Diana     | Centro Hospitalar de Vila Nova de Gaia/Espinho".                                                                        | R. Conceição Fernandes, 4434-502 Vila Nova de Gaia     |

| Country  | Hospital Name                                                | Surname           | Name      | Affiliation                                                                                                                                                                                                | Address primary affiliation                         |
|----------|--------------------------------------------------------------|-------------------|-----------|------------------------------------------------------------------------------------------------------------------------------------------------------------------------------------------------------------|-----------------------------------------------------|
| Qatar    | Hammad Medical Corporation                                   | Lance             | Marcus    | Aga Khan University Nairobi, Kenya                                                                                                                                                                         | 3rd Parklands Ave, Nairobi                          |
| Serbia   | Military Medical Academy Belgrade                            | Neskovic          | Vojislava | Associated Professor of Anesthesia and intensive Care                                                                                                                                                      | Crnotravska 17, Belgrade                            |
| Slovenia | General Hospital Celje: internal intensive care              | Podbregar         | Matej     | Medical ICU, General Hospital Celje                                                                                                                                                                        | Celje, Slovenia                                     |
| Slovenia | University medical center Ljubljana: internal intensive care | Mark              | Igor      | Clinical department for internal intensive care, UMC Ljubljana                                                                                                                                             | Ljubljana, Slovenia                                 |
| Slovenia | University medical center Ljubljana: cardiothoracic ICU      | Mušič             | Elizabeta | Cardiothoracic ICU, UMC Ljubljana                                                                                                                                                                          | Ljubljana, Slovenia                                 |
| Slovenia | University medical center Ljubljana: surgical intensive care | Mirković          | Tomislav  | Department of Anaesthesiology and Surgical Intensive Care, UMC Ljubljana                                                                                                                                   | Ljubljana, Slovenia                                 |
| Slovenia | University medical center Maribor: internal intensive care   | Markota           | Andrej    | Medical Intensive Care Unit, UMC Maribor                                                                                                                                                                   | Maribor, Slovenia                                   |
| Slovenia | University medical center Maribor: surgical intensive care   | Krope             | Natalija  | Surgical ICU, UMC Maribor                                                                                                                                                                                  | Maribor, Slovenia                                   |
| Slovenia | General hospital Novo Mesto                                  | Kmet              | Marko     | Medical ICU, general Hospital Novo mesto                                                                                                                                                                   | Novo mesto, Slovenia                                |
| Slovenia | General hospital Murska Sobota                               | Forjan            | Petra     | ICU, general Hospital, Murska Sobota                                                                                                                                                                       | Murska Sobota, Slovenia                             |
| Slovenia | General hospital Jesenice                                    | Savli             | Tomaž     | Surgical ICU, General Hospital Jesenice                                                                                                                                                                    | Jesenice, Slovenia                                  |
| Spain    | University Hospital Doctor Peset                             | Llau              | Juan V    | Chief of the department of anaesthesiology and post-surgical critical care<br>University Hospital Doctor Peset - Valencia, Spain<br>Associated Professor of Anaesthesiology. University of Valencia, Spain | Valencia                                            |
| Spain    | Hospital Universitario La Paz                                | Quintana-Diaz     | Manuel    | Intensive Care Service                                                                                                                                                                                     | P.º de la Castellana, 261, 28046 Madrid             |
| Spain    | Hospital Clinic Universitari de València                     | Aguilar           | Gerardo   | Anaesthesiology and Critical Care Service                                                                                                                                                                  | Av. de Blasco Ibáñez, 17, 46010 València, Valencia  |
| Spain    | H. General Universitario Reina Sofia Murcia                  | González-Celdrán  | Rebeca    | Department of Intensive Care                                                                                                                                                                               | Av. Intendente Jorge Palacios, 1, 30003 Murcia      |
| Spain    | Hospital Universitario Doctor Peset                          | Martínez-González | Estefanía | Department of Intensive Care                                                                                                                                                                               | Av. de Gaspar Aguilar, 90, 46017 València, Valencia |

| Country         | Hospital Name                                        | Surname      | Name          | Affiliation                                                                                                   | Address primary affiliation                                                             |
|-----------------|------------------------------------------------------|--------------|---------------|---------------------------------------------------------------------------------------------------------------|-----------------------------------------------------------------------------------------|
| Spain           | Hospital Universitario de Salamanca                  | Díaz         | Agustín       | Department of Intensive Care                                                                                  | P.º de San Vicente, 182, 37007 Salamanca                                                |
| Spain           | Hospital de Bellvitge                                | Colomina     | María José    | Department of Intensive Care                                                                                  | Carrer de la Feixa Llarga, s/n, 08907 L'Hospitalet de Llobregat, Barcelona              |
| Spain           | Clínica Universidad de Navarra                       | Hidalgo      | Francisco     | Department of Intensive Care                                                                                  | Av. de Pío XII, 36, 31008 Pamplona, Navarra                                             |
| Spain           | Surgical IC Clinic Hospital Barcelona                | Ferrando     | Carlos        | Department of Intensive Care                                                                                  | C. de Villarroel, 170, 08036 Barcelona                                                  |
| Spain           | Hospital Universitari i Politecnic La Fe, Valencia   | Ferrandis    | Raquel        | Department of Intensive Care                                                                                  | Avinguda de Fernando Abril Martorell, 106, 46026 València, Valencia                     |
| Spain           | Consortio Hospital General Universitario de Valencia | Ferrer       | Carolina      | Department of Intensive Care                                                                                  | Av. de les Tres Creus, 2, 46014 València, Valencia                                      |
| Spain           | Hospital Sant Pau                                    | Cegarra      | Virginia      | Department of Intensive Care                                                                                  | Carrer de Sant Antoni Maria Claret, 167, 08025 Barcelona                                |
| Spain           | Hospital Universitario Virgen de la Victoria         | Gómez-Luque  | Aurelio       | Department of Intensive Care                                                                                  | Campus de Teatinos, S/N, 29010 Málaga                                                   |
| Sweden          | Sahlgrenska Universitetssjukhuset                    | Henman       | Stina         | Sahlgrenska University Hospital, Department of Anaesthesia and Intensive Care                                 | Blå Stråket 5, 413 45 Göteborg                                                          |
| Sweden          | Sunderbyns Sjukhus                                   | Blomstrand   | Disa          | Region Norrbotten                                                                                             | Region norrbotten 97189 Luleå                                                           |
| Sweden          | Akademiska Sjukhuset Uppsala                         | Risberg      | Emelie        | Akademiska Sjukhuset, Department of Anaesthesia and Intensive Care                                            | Anestesi, operation och intensivvård Akademiska sjukhuset Ing 70, plan 1 751 85 Uppsala |
| Sweden          | Södersjukhuset                                       | Cronhjort    | Maria         | Karolinska Institutet, Department of Clinical Science and Education, Södersjukhuset                           | Sjukhusbacken 10, 11883, Södersjukhuset                                                 |
| Sweden          | Södersjukhuset                                       | Johansen     | Natalie       | Södersjukhuset, Department of Anaesthesia and Intensive Care                                                  | Sjukhusbacken 10, 11883, Södersjukhuset                                                 |
| Sweden          | Karolinska Sjukhuset Solna                           | Rajala       | Henrik        | Karolinska Universitetssjukhuset, Department of Anaesthesia and Intensive Care                                | Karolinska Universitetssjukhuset, Solna, 17176 Stockholm                                |
| Sweden          | Karolinska Sjukhuset Huddinge                        | Layous       | Natalie       | Karolinska Universitetssjukhuset, Department of Anaesthesia and Intensive Care                                | Karolinska Universitetssjukhuset, Huddinge, 141 86 Stockholm                            |
| Switzerland     | University Hospital of Bern                          | Pfortmueller | Carmen Andrea | Department of Intensive Care, Inselspital, Bern University Hospital and University of Bern, Bern, Switzerland | Freiburgstrasse 10, 3010 Bern                                                           |
| The Netherlands | St Antonius Ziekenhuis                               | Vlot         | Eline A.      | Department of Intensive Care                                                                                  | Koekoekslaan 1, 3435 CM Nieuwegein                                                      |
| The Netherlands | Dijklander ziekenhuis                                | Erkamp       | Michiel       | Department of Intensive Care, Dijklander Ziekenhuis                                                           | Maelsonstraat 3, 1624 NP Hoorn, NL                                                      |

| Country         | Hospital Name                                                                            | Surname                    | Name          | Affiliation                                                                                                                             | Address primary affiliation                                                         |
|-----------------|------------------------------------------------------------------------------------------|----------------------------|---------------|-----------------------------------------------------------------------------------------------------------------------------------------|-------------------------------------------------------------------------------------|
| The Netherlands | OLVG                                                                                     | Nicole                     | Juffermans    | OLVG                                                                                                                                    | Oosterpark 9 1091AC Amsterdam                                                       |
| The Netherlands | Amsterdam UMC, AMC                                                                       | van den Oord               | Claudia       | Department of Intensive Care, Amsterdam UMC, location AMC, Amsterdam                                                                    | Meibergdreef 9, 1105AZ                                                              |
| The Netherlands | Amsterdam UMC, AMC                                                                       | Reuland                    | Merijn        | Department of Intensive Care, Amsterdam UMC, location AMC, Amsterdam                                                                    | Meibergdreef 9, 1105AZ                                                              |
| The Netherlands | Amsterdam UMC, AMC                                                                       | van Wonderen               | Stefan        | Department of Intensive Care, Amsterdam UMC, location AMC, Amsterdam                                                                    | Meibergdreef 9, 1105AZ                                                              |
| The Netherlands | Amsterdam UMC, AMC                                                                       | Raasveld                   | Senta Jorinde | Department of Intensive Care, Amsterdam UMC, location AMC, Amsterdam                                                                    | Meibergdreef 9, 1105AZ                                                              |
| The Netherlands | Amsterdam UMC, AMC                                                                       | de Grooth                  | Harm-Jan      | Department of Intensive Care, Amsterdam UMC, location AMC, Amsterdam                                                                    | Meibergdreef 9, 1105AZ                                                              |
| The Netherlands | Amsterdam UMC, AMC                                                                       | de Bruin                   | Sanne         | Department of Intensive Care, Amsterdam UMC, location AMC, Amsterdam                                                                    | Meibergdreef 9, 1105AZ                                                              |
| The Netherlands | Amsterdam UMC, AMC                                                                       | Schenk                     | Jimmy         | Department of Intensive Care, Amsterdam UMC, location AMC, Amsterdam                                                                    | Meibergdreef 9, 1105AZ                                                              |
| The Netherlands | UMCG                                                                                     | Kuznecova-Keppel Hesselink | Lidija        | Intensive care unit                                                                                                                     | Hanzeplein 1, 9713 GZ Groningen                                                     |
| The Netherlands | Franciscus gasthuis & Vlietland                                                          | van Bochove                | Victor        | Franciscus Gasthuis & Vlietland                                                                                                         | kleiweg 500, 3045 PM, Rotterdam                                                     |
| Türkiye         | University of Health Sciences Dr.Siyami Ersek Thoracic and Cardiovascular Surgery Center | Yapici                     | Nihan         | Department of Anesthesiology and Reanimation, Dr.Siyami Ersek Thoracic and Cardiovascular Surgery Center, University of Health Sciences | Selimiye, Tibbiye Cd No:13, 34668 Uskudar/Istanbul                                  |
| Türkiye         | University of Health Sciences Dr.Siyami Ersek Thoracic and Cardiovascular Surgery Center | Acarel                     | Murat         | Department of Anesthesiology and Reanimation, Dr.Siyami Ersek Thoracic and Cardiovascular Surgery Center, University of Health Sciences | Selimiye, Tibbiye Cd No:13, 34668 Uskudar/Istanbul                                  |
| Türkiye         | Koc University School of Medicine Department of Anesthesiology and Reanimation           | Senturk                    | Evren         | Department of Anesthesiology and Reanimation, Koc University School of Medicine                                                         | Topkapi, Koc Universitesi Hastanesi, Davutpasa Cd. No:4, 34010 Zeytinburnu/Istanbul |
| Türkiye         | Harran University Medical Faculty Department of Anesthesiology and Reanimation           | Karahan                    | Mahmut Alp    | Department of Anesthesiology and Reanimation, Harran University Medical Faculty                                                         | Sanlıurfa-Mardin Karayolu Sanlıurfa/Türkiye                                         |



| Country | Hospital Name                                                                                        | Surname           | Name         | Affiliation                                                                                                            | Address primary affiliation                                                 |
|---------|------------------------------------------------------------------------------------------------------|-------------------|--------------|------------------------------------------------------------------------------------------------------------------------|-----------------------------------------------------------------------------|
| Türkiye | Baskent University Faculty of Medicine, Anesthesiology Department                                    | Camkiran<br>Firat | Aynur        | Department Anesthesiology, Baskent University Faculty of Medicine                                                      | Yukari Bahcelievler, Maresal Fevzi Cakmak Cd. No:45, 06490 Cankaya/Ankara   |
| Türkiye | Medipol University Medical Faculty Hospital                                                          | Yildiz            | Yahya        | Department Anesthesiology, Medipol University Medical Faculty Hospital                                                 | TEM Avrupa otoyolu goztepe cikisi no:1, 34214 Bagcilar/Istanbul             |
| Türkiye | University of Health Sciences Haydarpaşa Training and Research Hospital                              | Ekinci            | Osman        | Department of Anesthesiology and Reanimation, Haydarpaşa Training and Research Hospital, University of Health Sciences | Tibbiye Caddesi No:23 34668 Uskudar / ISTANBUL                              |
| Türkiye | University of Health Sciences Haydarpaşa Training and Research Hospital                              | Ozgultekin        | Asu          | Department of Anesthesiology and Reanimation, Haydarpaşa Training and Research Hospital, University of Health Sciences | Tibbiye Caddesi No:23 34668 Uskudar / ISTANBUL                              |
| Türkiye | Van Yuzuncu Yil University Dursun Odabas Medical Center                                              | Arikan            | Huseyin      | Department of Intensive Care, Dursun Odabas Medical Center, Van Yuzuncu Yil University                                 | Van Yuzuncu Yil Universitesi Dursun Odabas Tip Merkezi, 65000, Kampus / VAN |
| Türkiye | Zonguldak Bülent Ecevit University Faculty of Medicine, Department of Anesthesiology and Reanimation | Kucukosman        | Gamze        | Department of Anesthesiology and Reanimation, Zonguldak Bülent Ecevit University Faculty of Medicine                   | Esenkoy, 67000 Zonguldak Merkez/Zonguldak                                   |
| Türkiye | Zonguldak Bülent Ecevit University Faculty of Medicine, Department of Anesthesiology and Reanimation | Aydin             | Bengu Gulhan | Department of Anesthesiology and Reanimation, Zonguldak Bülent Ecevit University Faculty of Medicine                   | Esenkoy, 67000 Zonguldak Merkez/Zonguldak                                   |
| Türkiye | University of Health Sciences Izmir Tepecik Training and Research Hospital                           | Yavuz             | Mehmet       | Department of Intensive Care, Izmir Tepecik Training and Research Hospital, University of Health Sciences              | Yenisehir, Gaziler Cd No:468, 35020 Konak/Izmir                             |
| Türkiye | University of Health Sciences Fatih Sultan Mehmet Education and Research Hospital, ICU               | Oztas             | Alev         | Department of Intensive Care, Fatih Sultan Mehmet Education and Research Hospital, University of Health Sciences       | Icerenkoy, D100 Uzeri D:İ, 34752 Atasehir/Istanbul                          |
| Türkiye | University of Health Sciences Antalya Training and Research Hospital                                 | Kavrut<br>Ozturk  | Nilgun       | Department of Anesthesiology and Reanimation, Antalya Training and Research Hospital, University of Health Sciences    | Varlik, Kazim Karabekir Cd., 07100 Muratpasa/Antalya                        |
| Türkiye | Malatya Training and Research Hospital                                                               | Kasapoglu         | Umut Sabri   | Department of Intensive Care, Malatya Training and Research Hospital                                                   | Ozalper, Kanal Boyu Cd. No:4, 44000 Yesilyurt/Malatya                       |

| Country | Hospital Name                                                                                                          | Surname   | Name        | Affiliation                                                                                                                                          | Address primary affiliation                                                                             |
|---------|------------------------------------------------------------------------------------------------------------------------|-----------|-------------|------------------------------------------------------------------------------------------------------------------------------------------------------|---------------------------------------------------------------------------------------------------------|
| Türkiye | Yozgat Bozok University<br>Faculty Of Medicine<br>Department Of<br>Anesthesiology And<br>Reanimation                   | Miniksar  | Hakan       | Department Of Anesthesiology And Reanimation, Faculty Of<br>Medicine , Yozgat Bozok University                                                       | Capanoglu Mah. Cemil cicek Cad<br>Bozok Universitesi, Ataturk Yolu 7. KM,<br>66100 Yozgat Merkez/Yozgat |
| Türkiye | University of Health<br>Sciences Sureyyapasa<br>Chest Diseas and Thoracic<br>Surgery Training and<br>Research Hospital | Tuncay    | Eylem       | Department of Intensive Care Sureyyapasa Chest Diseas and<br>Thoracic Surgery Training and Research Hospital, University of<br>Health Sciences       | Basibuyuk, Hastane Yolu D:c blok,<br>34844 Maltepe/Istanbul                                             |
| Türkiye | University of Health<br>Sciences Kartal Kosuyolu<br>High Speciality Educational<br>and Research Hospital               | Indelen   | Cenk        | Department Of Anesthesiology And Reanimation, Kartal<br>Kosuyolu High Speciality Educational and Research Hospital,<br>University of Health Sciences | Cevizli, 2, Denizer Caddesi, Cevizli<br>Kavsagi, 34865 Kartal/Istanbul                                  |
| Türkiye | University of Health<br>Sciences Kartal Kosuyolu<br>High Speciality Educational<br>and Research Hospital               | Ogus      | Halide      | Department Of Anesthesiology And Reanimation, Kartal<br>Kosuyolu High Speciality Educational and Research Hospital,<br>University of Health Sciences | Cevizli, 2, Denizer Caddesi, Cevizli<br>Kavsagi, 34865 Kartal/Istanbul                                  |
| Türkiye | Recep Tayyip Erdogan<br>University Medical Faculty                                                                     | Erdivanli | Basar       | Department Of Anesthesiology And Reanimation, Medical<br>Faculty Hospital, Recep Tayyip Erdogan University                                           | Islampasa Mahallesi.Sehitler Caddesi<br>No.74 Rize                                                      |
| Türkiye | University of Health<br>Sciences Kanuni Sultan<br>Süleyman Training and<br>Research Hospital                           | Sahin     | Ayca Sultan | Department Of Anesthesiology And Reanimation, Kanuni Sultan<br>Süleyman Training and Research Hospital, University of Health<br>Sciences             | Atakent Mh, Turgut Ozal Bulvari<br>No:46/1, 34303 Kucukcekmece/Istanbul                                 |
| Türkiye | University of Health<br>Sciences Derince Training<br>and Research Hospital                                             | Yilmaz    | Mehmet      | Department Of Anesthesiology And Reanimation, Derince<br>Training and Research Hospital, University of Health Sciences                               | Ibnisina, Lojman Sk., 41900<br>Derince/Kocaeli                                                          |
| Türkiye | University of Health<br>Sciences Bursa Yuksek<br>Ihtisas Training and<br>Research Hospital                             | Sayan     | Erken       | Department Of Anesthesiology And Reanimation, Bursa Yuksek<br>Ihtisas Training and Research Hospital, University of Health<br>Sciences               | Mimarsinan Mah. Emniyet Cad. 16310<br>Yildirim/Bursa                                                    |
| Türkiye | University of Health<br>Sciences Bursa Yuksek<br>Ihtisas Training and<br>Research Hospital                             | Yilmaz    | Canan       | Department Of Anesthesiology And Reanimation, Bursa Yuksek<br>Ihtisas Training and Research Hospital, University of Health<br>Sciences               | Mimarsinan Mah. Emniyet Cad. 16310<br>Yildirim/Bursa                                                    |
| Türkiye | University of Health<br>Sciences Umraniye<br>Training and Research<br>Hospital                                         | Goksu     | Senay       | Department Of Anesthesiology And Reanimation, Ümraniye<br>Training and Research Hospital, University of Health Sciences                              | Elmalikent, Adem Yavuz Cd., 34764<br>Umraniye/Istanbul                                                  |

| Country | Hospital Name                                                                        | Surname       | Name        | Affiliation                                                                                                                                                  | Address primary affiliation                                                              |
|---------|--------------------------------------------------------------------------------------|---------------|-------------|--------------------------------------------------------------------------------------------------------------------------------------------------------------|------------------------------------------------------------------------------------------|
| Türkiye | Konya Training and Research Hospital                                                 | Basaran       | Betul       | Department Of Anesthesiology And Reanimation, Konya Training and Research Hospital                                                                           | Ayanbey Mah.Yeni Meram Cad.No:97 Konya                                                   |
| Türkiye | Konya Training and Research Hospital                                                 | Kutahya       | Emine       | Department Of Anesthesiology And Reanimation, Konya Training and Research Hospital                                                                           | Ayanbey Mah.Yeni Meram Cad.No:97 Konya                                                   |
| Türkiye | University of Health Sciences Gaziosmanpasa Training and Research Hospital           | Gok           | Ayfer Kaya  | Department Of Anesthesiology And Reanimation, Gaziosmanpasa Training and Research Hospital, University of Health Sciences                                    | Karayollari, Osmanbey Cd. 621 Sokak, 34255 Gaziosmanpasa/Istanbul                        |
| Türkiye | University of Health Sciences Ankara Training and Research Hospital                  | Ozcan         | Ayse        | Department Of Anesthesiology And Reanimation, Ankara Training and Research Hospital, University of Health Sciences                                           | Ankara Egitim ve Arastirma Hastanesi Hacettepe Mh. Ulucanlar Cd. No:89 Altindag / ANKARA |
| Türkiye | Selcuk University Medical Faculty                                                    | Kara          | Iskender    | Department Of Anesthesiology And Reanimation, Medical Faculty, Selcuk University                                                                             | Ardicli, Akademi, Celal Bayar Cd. No:313, 42250 Selcuklu/Konya                           |
| Türkiye | University of Health Sciences Trabzon Kanuni Training and Research Hospital          | Kartal        | Seyfi       | Department Of Anesthesiology And Reanimation, Trabzon Kanuni Training and Research Hospital, University of Health Sciences                                   | Kasustu Mah. Topal Osman Cad. No: 7 Yomra / TRABZON                                      |
| Türkiye | University of Health Sciences Kartal Dr. Lutfi Kirdar Training and Research Hospital | Saracoglu     | Kemal Tolga | Department Of Anesthesiology And Reanimation, University of Health Sciences Kartal Dr. Lutfi Kirdar Training and Research Hospital                           | Cevizli, D-100 Guney Yanyol, Cevizli Mevkii No:47, 34865 Kartal/Istanbul                 |
| Türkiye | University of Health Sciences Kartal Dr. Lutfi Kirdar Training and Research Hospital | Bilir         | Yeliz       | Department Of Anesthesiology And Reanimation, University of Health Sciences Kartal Dr. Lutfi Kirdar Training and Research Hospital                           | Cevizli, D-100 Guney Yanyol, Cevizli Mevkii No:47, 34865 Kartal/Istanbul                 |
| Türkiye | Giresun University Medical Faculty                                                   | Eyupoglu      | Selin       | Department of Intensive Care, Medical Faculty , Giresun University                                                                                           | Merkez, Teyyareduzu Mah, Ataturk Blv. No:323, 28200 Giresun Merkez/Giresun               |
| Türkiye | S.B.U. Diskapi Yildirim Beyazit Training and Research Hospital-Ankara                | Ertugrul Oruc | Nigar       | Department Of Anesthesiology And Reanimation, Diskapi Yildirim Beyazit Training and Research Hospital, University of Health Sciences                         | Ziraat, Sht. Omer Halisdemir Blv No:1, 06110 Altindag/Ankara                             |
| Türkiye | Ministry of Health Sakarya Training and research Hospital                            | Issever       | Kubilay     | Department of Intensive Care, Sakarya Training and research Hospital, Ministry of Health/ Giresun University Medical Faculty Department of Internal Medicine | Adnan Menderes Caddesi Saglik Sokak No: 195 Adapazari                                    |
| UK      |                                                                                      | Shah          | Akshay      | Nuffield Department of Clinical Neurosciences, University of Oxford, Oxford                                                                                  |                                                                                          |
| UK      | Warwick Hospital                                                                     | Patel         | Jamie       | Warwick Hospital                                                                                                                                             | Lakin Road, Warwick, CV34 5BW                                                            |
| UK      | Lewisham and Greenwich NHS Trust                                                     | Clarke        | Jayson      | University Hospital Lewisham                                                                                                                                 | Lewisham High Street, London, SE13 6LH                                                   |
| UK      | Whittington Health                                                                   | Ma            | Louise      | Whittington Hospital                                                                                                                                         | Magdala Avenue, London, N19 5NF                                                          |

| Country | Hospital Name                                                                                     | Surname   | Name     | Affiliation                                                                                                                                                                                                                                                                                                                                                             | Address primary affiliation                                                        |
|---------|---------------------------------------------------------------------------------------------------|-----------|----------|-------------------------------------------------------------------------------------------------------------------------------------------------------------------------------------------------------------------------------------------------------------------------------------------------------------------------------------------------------------------------|------------------------------------------------------------------------------------|
| UK      | Bradford Teaching Hospitals                                                                       | Lawton    | Tom      | Bradford Teaching Hospitals NHS Foundation Trust                                                                                                                                                                                                                                                                                                                        | Bradford Royal Infirmary, Duckworth Lane, Bradford, BD9 6RJ                        |
| UK      | Mid Yorkshire Hospitals NHS Trust                                                                 | Sloan     | Brendan  | Mid Yorkshire Hospitals NHS Trust                                                                                                                                                                                                                                                                                                                                       | Pinderfields Hospital, Wakefield, WF1 4DG                                          |
| UK      | SWBH Birmingham                                                                                   | Kannan    | Santhana | City Hospital                                                                                                                                                                                                                                                                                                                                                           | Sandwell and West Birmingham Hospitals NHS Trust, Dudley Road, Birmingham, B19 7QH |
| UK      | Somerset FT                                                                                       | Innes     | Richard  | Taunton and Somerset NHS Foundation Trust                                                                                                                                                                                                                                                                                                                               | Musgrove Park Hospital, Parkfield Drive, Taunton, TA1 5DA                          |
| UK      | South Tyneside and Sunderland NHS Foundation Trust                                                | Carpenter | Mark     | South Tyneside and Sunderland NHS Foundation Trust                                                                                                                                                                                                                                                                                                                      | Kayll Road, Sunderland, SR4 7TP                                                    |
| UK      | Swansea Bay University Health Board                                                               | Newey     | Luke     | Morrison Hospital                                                                                                                                                                                                                                                                                                                                                       | Swansea                                                                            |
| UK      | Barnsley Hospital NHS Foundation Trust                                                            | Alwagih   | Hazem    | Barnsley Hospital                                                                                                                                                                                                                                                                                                                                                       | Foundation Block 2, Pogmoor Road Entrance, Barnsley, S75 2EP                       |
| UK      | Oxford John Radcliffe Hospital                                                                    | Acott     | Chris    | Oxford University Hospitals NHS Foundation                                                                                                                                                                                                                                                                                                                              | John Radcliffe Hospital, Oxford, OX3 9DU                                           |
| UK      | The Rotherham NHS Foundation Trust                                                                | Hormis    | Anil     | The Rotherham NHS Foundation Trust                                                                                                                                                                                                                                                                                                                                      | Moorgate Road, Rotherham, S60 2UD                                                  |
| UK      | Neuro ICU Oxford John Radcliffe Hospital                                                          | Herdman   | James    | Oxford University Hospitals NHS Foundation                                                                                                                                                                                                                                                                                                                              | John Radcliffe Hospital, Oxford, OX3 9DU                                           |
| UK      | Royal Berkshire Hospital                                                                          | Akrama    | Osama    | Royal Berkshire Hospital NHS Foundation Trust                                                                                                                                                                                                                                                                                                                           | London Road, Reading, Berkshire, RG1 5AN.                                          |
| UK      | Royal national Orthopaedic Hospital Stanmore                                                      | Baumber   | Rachel   | Royal National Orthopaedic Hospital NHS Trust                                                                                                                                                                                                                                                                                                                           | Brockley Hill, Stanmore, Middlesex, HA7 4LP                                        |
| Ukraine | O.O. Shalimov Nat. Institute of Surgery and Transplantology, Nat. Ac. of Med. Sciences of Ukraine | Khomenko  | Olena    | 1) State Institution O.O. Shalimov National Institute of Surgery and Transplantology of National Academy of Medical Sciences of Ukraine, Dept of Anaesthesiology & Intensive Care - Senior research fellow. 2) Bogomolets National Medical University, Department of Surgery, anaesthesiology and intensive care of the institute of postgraduate education - assistant | Heroiv Sevastopolia, 30 Kyiv, 03680                                                |
| USA     | Oregon Health and Science University                                                              | Khan      | Akram    | Oregon Health & Science University                                                                                                                                                                                                                                                                                                                                      | 3181 SW. Sam Jackson Park Rd. UHN-67, Portland Oregon 97239                        |
| USA     | Northwell EDU                                                                                     | Hasan     | Zubair   | Division of Pulmonary, Critical Care, and Sleep Medicine, Department of Medicine, Donald and Barbara Zucker School of Medicine at Hofstra/Northwell                                                                                                                                                                                                                     | 410 Lakeville Road, Suite 107, New Hyde Park, NY 11042 USA                         |
| USA     | university of new mexico school of medicine                                                       | Nielsen   | Nathan D | University of New Mexico School of Medicine                                                                                                                                                                                                                                                                                                                             | Albuquerque, NM                                                                    |

| <b>Country</b> | <b>Hospital Name</b>                           | <b>Surname</b> | <b>Name</b> | <b>Affiliation</b>                                                                                            | <b>Address primary affiliation</b> |
|----------------|------------------------------------------------|----------------|-------------|---------------------------------------------------------------------------------------------------------------|------------------------------------|
| USA            | university of new mexico<br>school of medicine | Raval          | Jay S.      | University of New Mexico School of Medicine                                                                   | Albuquerque, NM                    |
| USA            | Columbia University                            | Sutherland     | Lauren      | Department of Anesthesiology, Columbia University Medical<br>Center, New York City, United States of America. | 622 W 168th Street, NY, NY 10032   |

**eTable 4. Inclusion weeks**

| Inclusion week #                    | Week number | From<br>(dd-mm-yyyy) | Up to and including<br>(dd-mm-yyyy) | Year |
|-------------------------------------|-------------|----------------------|-------------------------------------|------|
| 1                                   | 10          | 2-3-2020             | 8-3-2020                            | 2020 |
| 2                                   | 16          | 13-4-2020            | 19-4-2020                           | 2020 |
| 3                                   | 22          | 25-5-2020            | 31-5-2020                           | 2020 |
| 4                                   | 30          | 20-7-2020            | 26-7-2020                           | 2020 |
| 5                                   | 37          | 7-9-2020             | 13-9-2020                           | 2020 |
| 6                                   | 43          | 19-10-2020           | 25-10-2020                          | 2020 |
| 7                                   | 49          | 7-12-2020            | 13-12-2020                          | 2020 |
| 8                                   | 3           | 18-1-2021            | 24-1-2021                           | 2021 |
| <b><i>Scheduled extra weeks</i></b> |             |                      |                                     |      |
| 9                                   | 10          | 8-3-2021             | 14-3-2021                           | 2021 |
| 10                                  | 15          | 12-4-2021            | 18-4-2021                           | 2021 |
| 11                                  | 21          | 24-5-2021            | 30-5-2021                           | 2021 |
| 12                                  | 26          | 28-6-2021            | 4-7-2021                            | 2021 |
| 13                                  | 31          | 2-8-2021             | 8-8-2021                            | 2021 |
| 14                                  | 38          | 20-9-2021            | 26-9-2021                           | 2021 |
| 15                                  | 43          | 25-10-2021           | 30-10-2021                          | 2021 |
| 16                                  | 48          | 29-11-2021           | 5-12-2021                           | 2021 |

An exception was made for Australia-New Zealand due to the delayed COVID-19 wave. Their data collection timeframe was rescheduled separately: January 2022 – October 2022.

## eMethods 1. Data cleaning, missing data patterns and prerequisites

After every inclusion week, the specific center's data was evaluated using a basic checklist, after which inconsistencies were shared with the center:

- Inclusion: is for an included patient informed consent available when required;
- Inclusion: is for every patient at least a demographics, daily, and outcome (28-day follow up) questionnaire available;
- Do the number of questionnaires (i.e., daily) match the stated number of ICU days;
- Do the number of transfusion questionnaires match the stated number of transfusion events.

In addition, after confirmation of the participating center that the data was complete, a more detailed check of the data was performed per center, after which outliers were shared and checked with the center itself. This included, but was not limited to:

- In case certain variables with dependencies are filled in, is the dependent variable filled in as well (i.e., "shock present" leads to "which type of shock");
- In case certain unit is filled in (i.e., for Hemoglobin g/L), are the values in line with the expected range of that unit (g/L);
- Inclusion: is for every patient at least a demographics, daily, and outcome (28-day follow up) questionnaire available;
- Do the number of questionnaires (i.e., daily) match the stated number of ICU days;
- Do the number of transfusion questionnaires match the stated number of transfusion events.

After closure of the database, we started with in detail assessment of the missing data. Different patterns can be found with regard to missing data, including missing-at-random (MAR), missing completely at random (MCAR) and not missing at random (NMAR). Depending of this missingness pattern, different strategies for handling missing data are advised. Most methods assume data is MAR. However, in case of NMAR, methods to handle the missing data points can be most complex.

Therefore, we evaluated the missing count and pattern using the *naniar* and *visdat* packages. By using these packages, we can identify the combinations of missingness and intersections of missingness amongst variables. Missingness of these variables was assumptive of a not-missing at random pattern, and was correlated with a majority of other missing variables in this patient. The following variables were identified as minimally required and thus mandatory:

- (Demographics) Sex;
- (Demographics) Code (do not resuscitate/do not intubate);
- (Demographics) Referring specialism;
- (Daily) Day of ICU stay/no. of day since ICU admission;
- (Daily) Hb measurement available;
- (Outcome) Follow-up at day 28;
- (Outcome) Number of days admitted.

Moreover, certain quality checks were performed, including the following:

- No. of daily questionnaires available **is equal to** days of ICU admission (with a maximum of 28 days that data collection was required);
- Daily questionnaire: RBC transfused = transfusion questionnaire for that day **has to be** available;
- In case of non-transfused: demographics, daily and outcome questionnaire **have to be** available;
- In case of transfused: demographics, daily, transfusion and outcome questionnaire **have to be** available;
- In case of ICU stay >3 days: daily questionnaires **have to have** concomitant dates.

Lastly, after removing the patient records of those who did not fulfill the above described criteria, an evaluation of the frequencies and patterns of missing data were assessed in the cleaned dataset. This resulted in the Table as presented on the following page.

**eTable 5. Missing data frequencies in cleaned dataset, stratified per continent**

| <b>Variable (alphabetical order)</b>                               | <b>Africa<br/>(N = 150)</b> | <b>Asia<br/>(N = 182)</b> | <b>Europe<br/>(N = 2,167)</b> | <b>South America<br/>(N = 50)</b> | <b>North America<br/>(N = 167)</b> | <b>Oceania<br/>(N = 927)</b> |
|--------------------------------------------------------------------|-----------------------------|---------------------------|-------------------------------|-----------------------------------|------------------------------------|------------------------------|
| Admission type (demographics)                                      | 0 (0)                       | 0 (0)                     | 0 (0)                         | 0 (0)                             | 0 (0)                              | 0 (0)                        |
| Age (demographics)                                                 | 0 (0)                       | 0 (0)                     | 0 (0)                         | 0 (0)                             | 0 (0)                              | 0 (0)                        |
| Anemia during ICU stay (daily)                                     | 8 (5)                       | 5 (3)                     | 32 (1.5)                      | 1 (2)                             | 2 (1.2)                            | 7 (0.8)                      |
| Blood loss (daily)                                                 | 13 (8.7)                    | 0 (0)                     | 23 (1.1)                      | 0 (0)                             | 0 (0)                              | 2 (0.2)                      |
| Code status: DNI (demographics)                                    | 0 (0)                       | 0 (0)                     | 0 (0)                         | 0 (0)                             | 0 (0)                              | 0 (0)                        |
| Code status: DNR (demographics)                                    | 0 (0)                       | 0 (0)                     | 0 (0)                         | 0 (0)                             | 0 (0)                              | 0 (0)                        |
| COVID status (28-day follow-up) <sup>a</sup>                       | 0 (0)                       | 0 (0)                     | 536 (24.7)                    | 8 (16)                            | 0 (0)                              | 25 (2.7)                     |
| Day 28 follow-up assessment (28-day follow-up)                     | 0 (0)                       | 0 (0)                     | 0 (0)                         | 0 (0)                             | 0 (0)                              | 0 (0)                        |
| Hb available admission (demographics)                              | 0 (0)                       | 0 (0)                     | 13 (0.6)                      | 0 (0)                             | 0 (0)                              | 0 (0)                        |
| Hb threshold (transfusion)                                         | 40/89 (45.0)                | 25/103 (24.3)             | 266/1,024 (26.0)              | 0/31 (0)                          | 29/55 (52.7)                       | 179/425 (42.1)               |
| Hb before transfusion (transfusion)                                | 18/89 (20.2)                | 3/103 (2.9)               | 77/1,024 (7.5)                | 0/31 (0)                          | 2/55 (3.6)                         | 17/425 (4.0)                 |
| Hb after transfusion (transfusion)                                 | 20/89 (22.5)                | 30/103 (2.9)              | 192/1,024 (18.8)              | 0/31 (0)                          | 24/55 (43.6)                       | 58/425 (13.6)                |
| Medical history (demographics)                                     | 0 (0)                       | 0 (0)                     | 0 (0)                         | 0 (0)                             | 0 (0)                              | 0 (0)                        |
| Nadir Hb transfusion day (daily)                                   | 7 (4.7)                     | 5 (2.7)                   | 4 (0.2)                       | 1 (2.0)                           | 0 (0)                              | 5 (0.5)                      |
| Platelet count admission available (demographics)                  | 0 (0)                       | 0 (0)                     | 2 (0.1)                       | 0 (0)                             | 0 (0)                              | 0 (0)                        |
| Reason of admission (demographics)                                 | 1 (0.7)                     | 0 (0)                     | 5 (0.2)                       | 0 (0)                             | 0 (0)                              | 2 (0.2)                      |
| Referred from (demographics)                                       | 0 (0)                       | 0 (0)                     | 2 (0.1)                       | 0 (0)                             | 0 (0)                              | 0 (0)                        |
| Referring specialism (demographics)                                | 0 (0)                       | 0 (0)                     | 0 (0)                         | 0 (0)                             | 0 (0)                              | 0 (0)                        |
| Sex (demographics)                                                 | 0 (0)                       | 0 (0)                     | 0 (0)                         | 0 (0)                             | 0 (0)                              | 0 (0)                        |
| Shock present (demographics)                                       | 0 (0)                       | 0 (0)                     | 0 (0)                         | 0 (0)                             | 0 (0)                              | 0 (0)                        |
| SOFA (daily)                                                       | 37 (24.7)                   | 21 (11.5)                 | 401 (18.5)                    | 1 (2.0)                           | 151 (90.4)                         | 257 (27.7)                   |
| Supportive therapy at admission: other (demographics)              | 0 (0)                       | 0 (0)                     | 0 (0)                         | 0 (0)                             | 0 (0)                              | 0 (0)                        |
| Supportive therapy: mechanical invasive ventilation (demographics) | 0 (0)                       | 0 (0)                     | 0 (0)                         | 0 (0)                             | 0 (0)                              | 0 (0)                        |
| Surgery <24 hours prior to ICU admission (demographics)            | 0 (0)                       | 0 (0)                     | 0 (0)                         | 0 (0)                             | 0 (0)                              | 0 (0)                        |
| Total days ICU stay (28-day follow up)                             | 0 (0)                       | 0 (0)                     | 0 (0)                         | 0 (0)                             | 0 (0)                              | 0 (0)                        |
| Transfusion status (daily)                                         | 0 (0)                       | 0 (0)                     | 0 (0)                         | 0 (0)                             | 0 (0)                              | 0 (0)                        |
| Type of surgery (demographics)                                     | 0 (0)                       | 0 (0)                     | 0 (0)                         | 0 (0)                             | 0 (0)                              | 0 (0)                        |

Sex, code (DNR/DNI), referring specialism, days of ICU stay, at least one daily Hb available, follow-up status at day 28 and total days of ICU submission were identified as variables with an interaction suggestive of not-missing-at-random data. A total of 104 patients with missing data were removed, as well as 9 with an incongruence in questionnaires, resulting in the cleaned dataset (eMethods 1). <sup>a</sup> COVID variable was introduced after the second inclusion week, at the time the pandemic started.



**eFigure 1. Flowchart**

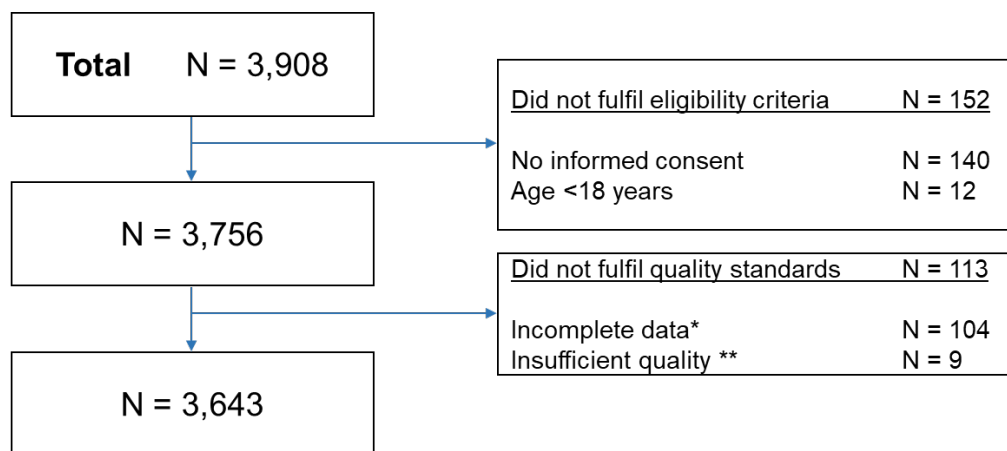

**Flowchart**

\* Incomplete data: after assessment of the missingness pattern, seven variables were identified as “minimally required” and thus “mandatory”. Missingness of these variables was assumptive of a not-missing-at-random pattern, and as a result marked as “*mandatory*” variables. Mandatory variables included: sex, code (do not resuscitate/intubate), referral, day since admission day, Hb measurement available, follow-up state at day 28, number of days admitted.

\*\* Insufficient quality: i.e., large incongruence between questionnaire types, for example non-consecutive calendar dates in consecutive daily questionnaires larger than a day difference (i.e., within different months), or grotesque mismatches in number of questionnaires (for example, two daily questionnaires created for a patient with a stated ICU admission of 28 days).

eTable 6. Details participating countries

| Country                  | No. of centers | No. of patients | Income status       | Transfusion occurrence rate (%) | mean Hb threshold among those transfused | mean nadir Hb on transfused days among those transfused | mean Hb during ICU stay among all patients |
|--------------------------|----------------|-----------------|---------------------|---------------------------------|------------------------------------------|---------------------------------------------------------|--------------------------------------------|
|                          |                |                 |                     |                                 | median (IQR)                             | median (IQR)                                            | median (IQR)                               |
| Australia                | 31             | 731             | High income         | 22                              | 8.0 (7.0-8.0)                            | 7.5 (6.9-8.0)                                           | 10.4 (8.8-12.2)                            |
| Bangladesh               | 2              | 31              | Lower middle income | 26                              | 7.0 (6.8-9.0)                            | 8.2 (7.6-9.0)                                           | 11.1 (10.5-12.9)                           |
| Belgium                  | 2              | 43              | High income         | 19                              | 7.5 (7.3-7.5)                            | 6.9 (6.5-7.5)                                           | 11.0 (9.0-13.2)                            |
| Croatia                  | 4              | 70              | High income         | 33                              | 9.0 (8.6-9.0)                            | 8.5 (8.0-8.9)                                           | 10.4 (9.4-11.6)                            |
| Czech Republic           | 2              | 39              | High income         | 13                              | 9.0 (8.5-9.5)                            | 7.8 (7.3-8.3)                                           | 10.8 (9.4-11.7)                            |
| Denmark                  | 3              | 45              | High income         | 31                              | 6.9 (6.9-6.9)                            | 8.4 (7.5-8.9)                                           | 10.6 (8.8-12.3)                            |
| Ecuador                  | 4              | 50              | Upper middle income | 28                              | 11.5 (10.2-13.6)                         | 7.9 (7.5-8.7)                                           | 11.9 (9.7-13.4)                            |
| Egypt                    | 1              | 5               | Lower middle income | 80                              | -                                        | 8.3 (8.0-9.0)                                           | 9.7 (9.3-10.1)                             |
| France                   | 16             | 254             | High income         | 16                              | 7.0 (7.0-8.0)                            | 7.3 (6.7-8.3)                                           | 10.6 (8.8-12.0)                            |
| Greece                   | 21             | 106             | High income         | 28                              | 8.0 (7.0-8.0)                            | 7.4 (7.0-8.1)                                           | 10.6 (9.2-11.9)                            |
| India                    | 6              | 138             | Lower middle income | 36                              | 9.0 (8.6-10)                             | 7.8 (7.0-9.3)                                           | 9.9 (8.3-11.6)                             |
| Iran                     | 1              | 5               | Lower middle income | 0                               | -                                        | -                                                       | 8.1 (7.9-8.6)                              |
| Iraq                     | 1              | 8               | Upper middle income | 38                              | 8.0 (7.5-8.6)                            | 7.9 (7.6-8.0)                                           | 8.0 (7.4-8.7)                              |
| Italy                    | 6              | 51              | High income         | 24                              | 8.0 (8.0-8.0)                            | 7.6 (7.3-7.9)                                           | 9.6 (8.5-12.3)                             |
| Libya                    | 22             | 115             | Upper middle income | 45                              | 10.0 (8.0-12.8)                          | 8.7 (7.2-10.2)                                          | 10.0 (8.4-12.7)                            |
| Morocco                  | 1              | 23              | Lower middle income | 48                              | 10.0 (9.0-10.0)                          | 8.8 (8.5-9.2)                                           | 9.5 (9.3-10.3)                             |
| New-Zealand              | 9              | 196             | High income         | 18                              | 8.0 (7.5-8.0)                            | 7.5 (7.2-7.7)                                           | 10.2 (8.8-12.0)                            |
| Poland                   | 11             | 59              | High income         | 27                              | 8.0 (8.0-9.0)                            | 7.4 (6.8-7.7)                                           | 10.0 (8.8-11.5)                            |
| Portugal                 | 8              | 126             | High income         | 20                              | 7.5 (7.0-8.0)                            | 7.2 (6.7-7.5)                                           | 11.0 (9.1-12.6)                            |
| Qatar                    | 1              | 7               | High income         | 14                              | 8.0 (8.0-8.0)                            | 7.9 (7.9-7.9)                                           | 12.1 (9.8-13.5)                            |
| Serbia                   | 1              | 16              | Upper middle income | 6                               | 7.0 (7.0-7.0)                            | 5.3 (5.3-5.3)                                           | 12.4 (11.2-13.1)                           |
| Slovenia                 | 7              | 50              | High income         | 40                              | 9.0 (9.0-10.0)                           | 8.3 (8.2-8.7)                                           | 10.2 (9.2-12.1)                            |
| Spain                    | 11             | 194             | High income         | 24                              | 8.0 (7.5-9.0)                            | 8.1 (7.4-8.8)                                           | 11.0 (9.2-12.4)                            |
| Sweden                   | 6              | 86              | High income         | 29                              | 8.8 (8.0-9.0)                            | 7.8 (7.5-8.5)                                           | 10.9 (8.9-12.5)                            |
| Switzerland              | 1              | 44              | High income         | 23                              | 8.0 (7.0-8.8)                            | 7.3 (7.1-8.3)                                           | 10.3 (8.3-12.9)                            |
| the Netherlands          | 6              | 128             | High income         | 20                              | 7.3 (7.3-8.1)                            | 8.1 (7.4-9.7)                                           | 11.0 (9.8-12.3)                            |
| Turkey                   | 29             | 685             | Upper middle income | 28                              | 9.0 (8.0-9.0)                            | 8.0 (7.3-8.8)                                           | 10.2 (8.9-11.6)                            |
| Ukraine                  | 1              | 47              | Lower middle income | 23                              | 8.0 (8.0-9.0)                            | 9.1 (8.1-10.2)                                          | 12.0 (10.0-13.2)                           |
| United Kingdom           | 15             | 124             | High income         | 19                              | 7.0 (7.0-7.9)                            | 7.9 (7.3-9.6)                                           | 11.1 (9.5-12.5)                            |
| United States of America | 4              | 167             | High income         | 19                              | 7.0 (7.0-7.0)                            | 7.2 (6.7-7.7)                                           | 10.8 (9.1-13.0)                            |

**eTable 7. Patient outcomes stratified by transfusion status**

| <b>Variable</b>                                                                                                                                                                                      | <b>Overall<br/>N = 3,643</b> | <b>Transfused<br/>N = 894</b> | <b>Non-transfused<br/>N = 2,749</b> | <b>P-value<br/>(unadjusted)</b> |
|------------------------------------------------------------------------------------------------------------------------------------------------------------------------------------------------------|------------------------------|-------------------------------|-------------------------------------|---------------------------------|
| Total days ICU admission                                                                                                                                                                             | 3 (2 - 6)                    | 4 (2 - 9)                     | 3 (2 - 5)                           | <0.001                          |
| Day 28, state of patient                                                                                                                                                                             |                              |                               |                                     |                                 |
| <i>Alive</i>                                                                                                                                                                                         | 2781 (76.3)                  | 651 (72.8)                    | 2130 (77.5)                         | <0.01                           |
| Discharged from hospital                                                                                                                                                                             | 2248 (80.8)                  | 439 (67.3)                    | 1809 (84.9)                         | <0.001                          |
| General ward                                                                                                                                                                                         | 426 (15.3)                   | 151 (23.2)                    | 275 (12.9)                          | <0.001                          |
| ICU                                                                                                                                                                                                  | 83 (3.0)                     | 51 (7.8)                      | 32 (1.5)                            | <0.001                          |
| ICU readmission                                                                                                                                                                                      | 25 (0.9)                     | 11 (1.7)                      | 14 (0.7)                            | 0.03                            |
| <i>Deceased</i>                                                                                                                                                                                      | 618 (17.0)                   | 206 (23.0)                    | 412 (15.0)                          | <0.001                          |
| During ICU admission                                                                                                                                                                                 | 443 (71.8)                   | 150 (73.2)                    | 293 (71.1)                          | 0.73                            |
| After ICU admission, inside hospital                                                                                                                                                                 | 157 (25.4)                   | 51 (24.9)                     | 106 (25.7)                          | 0.87                            |
| After ICU admission, outside hospital                                                                                                                                                                | 17 (2.8)                     | 4 (2.0)                       | 13 (3.2)                            | 0.54                            |
| <i>Unknown</i>                                                                                                                                                                                       | 244 (6.7)                    | 37 (4.1)                      | 207 (7.5)                           | 0.001                           |
| Discharged from ICU, status after discharge unknown                                                                                                                                                  | 55 (22.4)                    | 6 (15.8)                      | 49 (23.6)                           | 0.43                            |
| Transferred to other hospital (ICU), current status unknown                                                                                                                                          | 37 (15.0)                    | 9 (23.7)                      | 28 (13.5)                           | 0.26                            |
| Transferred to other hospital (general ward), current status unknown                                                                                                                                 | 20 (8.1)                     | 3 (7.9)                       | 17 (8.2)                            | 1.00                            |
| Discharged from hospital, current status unknown                                                                                                                                                     | 134 (54.5)                   | 20 (52.6)                     | 114 (54.8)                          | 1.00                            |
| COVID status                                                                                                                                                                                         |                              |                               |                                     | <0.001                          |
| Confirmed positive by CAT-scan (CO-RADS >5)                                                                                                                                                          | 13 (0.4)                     | 0 (0.0)                       | 13 (0.6)                            | 0.08                            |
| Confirmed positive by PCR test                                                                                                                                                                       | 304 (9.9)                    | 41 (5.7)                      | 263 (11.2)                          | <0.001                          |
| Suspected but no testing available                                                                                                                                                                   | 17 (0.6)                     | 4 (0.6)                       | 13 (0.6)                            | 1.00                            |
| No clinical suspicion and no testing                                                                                                                                                                 | 1638 (53.3)                  | 384 (53.0)                    | 1254 (53.4)                         | 0.04                            |
| Confirmed negative                                                                                                                                                                                   | 1102 (35.8)                  | 295 (40.7)                    | 807 (34.3)                          | 0.18                            |
| <b>Abbreviations:</b> CAT-scan, computerized axial tomography scan; CO-RADS, coronavirus disease 2019 (COVID-19) Reporting and Data System; ICU, intensive care unit; PCR, polymerase chain reaction |                              |                               |                                     |                                 |

**eTable 8. Post-surgical vs. non-post-surgical patients**

| <b>Variable</b>                                                                                                                                                                             | <b>Post-surgical admission (N = 1,602)<sup>a</sup></b> | <b>Non-post-surgical admission (N = 2,034)<sup>a</sup></b> |
|---------------------------------------------------------------------------------------------------------------------------------------------------------------------------------------------|--------------------------------------------------------|------------------------------------------------------------|
| Proportion transfused                                                                                                                                                                       | 491 (30.7)                                             | 401 (19.7)                                                 |
| Total sum RBC transfused                                                                                                                                                                    | 2 (1-4)                                                | 2 (1-3)                                                    |
| Total transfusion events                                                                                                                                                                    | 2 (1-3)                                                | 2 (1-4)                                                    |
| Mean Hb during ICU stay, g/dL                                                                                                                                                               | 10.3 (2.0)                                             | 10.9 (2.4)                                                 |
| Transfusion events (no.)                                                                                                                                                                    | 963                                                    | 762                                                        |
| Part of massive transfusion protocol                                                                                                                                                        | 34 (3.5)                                               | 9 (1.2)                                                    |
| Hemoglobin level                                                                                                                                                                            |                                                        |                                                            |
| Threshold pre-defined, g/dL                                                                                                                                                                 | 8.0 (7.5-9.0)                                          | 8.0 (7.0-9.0)                                              |
| Restrictive ( $\leq 7$ g/dL)                                                                                                                                                                | 110 (11.4)                                             | 189 (24.8)                                                 |
| Intermediate (7 - 9 g/dL)                                                                                                                                                                   | 241 (25.0)                                             | 189 (24.8)                                                 |
| Liberal ( $\geq 9$ g/dL)                                                                                                                                                                    | 289 (30.0)                                             | 170 (22.3)                                                 |
| Missing                                                                                                                                                                                     | 323 (33.5)                                             | 214 (28.0)                                                 |
| Prior transfusion, g/dL                                                                                                                                                                     | 7.88 (1.66)                                            | 7.40 (1.36)                                                |
| Post transfusion, g/dL                                                                                                                                                                      | 9.28 (1.54)                                            | 8.81 (1.32)                                                |
| Reason for RBC transfusion ( <i>multiple options possible</i> )                                                                                                                             |                                                        |                                                            |
| Low Hb value                                                                                                                                                                                | 739 (76.7)                                             | 672 (88.2)                                                 |
| Active bleed                                                                                                                                                                                | 304 (31.6)                                             | 175 (23.0)                                                 |
| Hemodynamic instability                                                                                                                                                                     | 241 (25.0)                                             | 165 (21.7)                                                 |
| Improving general state                                                                                                                                                                     | 68 (7.1)                                               | 74 (9.7)                                                   |
| Improving peripheral O <sub>2</sub>                                                                                                                                                         | 59 (6.1)                                               | 56 (7.3)                                                   |
| Age of patient                                                                                                                                                                              | 16 (1.7)                                               | 44 (5.8)                                                   |
| (New) coronary ischemia                                                                                                                                                                     | 32 (3.3)                                               | 37 (4.9)                                                   |
| Improving weaning                                                                                                                                                                           | 17 (1.8)                                               | 26 (3.4)                                                   |
| Pre-surgery                                                                                                                                                                                 | 45 (4.7)                                               | 21 (2.8)                                                   |
| Other                                                                                                                                                                                       | 36 (3.7)                                               | 11 (1.4)                                                   |
| Part of clinical trial                                                                                                                                                                      | 4 (0.4)                                                | 2 (0.3)                                                    |
| Exchange transfusion                                                                                                                                                                        | 1 (0.1)                                                | 1 (0.1)                                                    |
| Trigger for RBC transfusion ( <i>multiple options possible</i> )                                                                                                                            |                                                        |                                                            |
| None                                                                                                                                                                                        | 362 (37.6)                                             | 319 (41.9)                                                 |
| Hypotension                                                                                                                                                                                 | 420 (43.6)                                             | 308 (40.4)                                                 |
| Tachycardia                                                                                                                                                                                 | 253 (26.3)                                             | 220 (28.9)                                                 |
| High lactate levels (>2 mmol/L)                                                                                                                                                             | 169 (17.5)                                             | 139 (18.2)                                                 |
| Acidosis                                                                                                                                                                                    | 107 (11.1)                                             | 97 (12.7)                                                  |
| Arrhythmia                                                                                                                                                                                  | 33 (3.4)                                               | 37 (4.9)                                                   |
| SVO <sub>2</sub> < 65%                                                                                                                                                                      | 16 (1.7)                                               | 20 (2.6)                                                   |
| SCVO <sub>2</sub> < 65%                                                                                                                                                                     | 15 (1.6)                                               | 15 (2.0)                                                   |
| Other                                                                                                                                                                                       | 51 (5.3)                                               | 15 (2.0)                                                   |
| ECG changes                                                                                                                                                                                 | 9 (0.9)                                                | 14 (1.8)                                                   |
| Presented as no. (%) for frequency data, median (IQR, 1 <sup>st</sup> -3 <sup>rd</sup> quartile borders) for non-parametric and mean (SD) for parametric numerical variables.               |                                                        |                                                            |
| Post-surgical defined as receiving surgery within 24 hours before or after ICU admission.                                                                                                   |                                                        |                                                            |
| <sup>a</sup> For 7 patients, the post-surgical status was not available.                                                                                                                    |                                                        |                                                            |
| <b>Abbreviations:</b> ECG, Electrocardiogram; Hb, hemoglobin; RBC, red blood cells; SCVO <sub>2</sub> , central venous oxygen saturation; SVO <sub>2</sub> , mixed venous oxygen saturation |                                                        |                                                            |

**eFigure 2. Absolute count and proportion receiving an RBC transfusion per admission day**

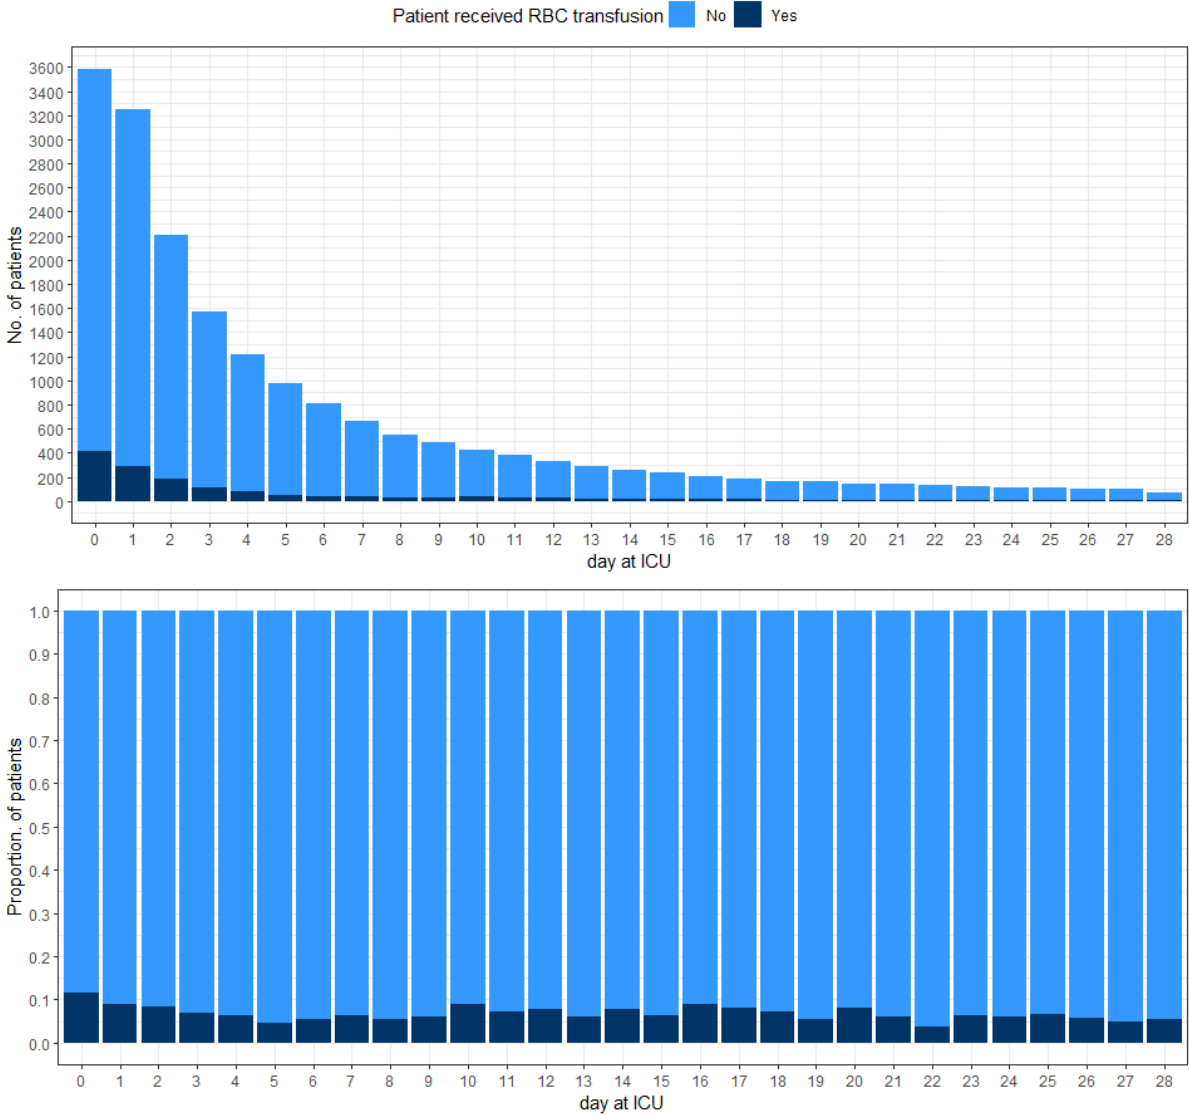

This figure shows the absolute count (above) and proportion (below) of patients that received an RBC transfusion for each admission day at the ICU. In the upper section, a steady decline in the absolute number of ICU admitted and transfused patients is observed. The lower section shows the average proportion of patients receiving an RBC transfusion per day at the ICU. The daily RBC transfusion rate was 6%, ranging from 11% (N=416/3,643) on admission to 5% on day 5 (N=46/973).

**eTable 9. Daily + transfusion details per continent**

| <b>Variable</b>                                                                                                                                                                                                                                                                          | <b>Africa<br/>(N = 150)</b> | <b>Asia<br/>(N = 182)</b> | <b>Europe<br/>(N = 2,167)</b> | <b>South America<br/>(N = 50)</b> | <b>North America<br/>(N = 167)</b> | <b>Oceania<br/>(N = 927)</b> |
|------------------------------------------------------------------------------------------------------------------------------------------------------------------------------------------------------------------------------------------------------------------------------------------|-----------------------------|---------------------------|-------------------------------|-----------------------------------|------------------------------------|------------------------------|
| Daily forms                                                                                                                                                                                                                                                                              | 3 (2-5)                     | 3 (2-5)                   | 3 (2-6)                       | 5 (3-13.75)                       | 3 (3-6)                            | 3 (2-5)                      |
| Daily blood loss, mL                                                                                                                                                                                                                                                                     | 0 (0-219)                   | 0 (0-200)                 | 0 (0-100)                     | 0 (0-35)                          | 0 (0-53)                           | 0 (0-50)                     |
| SOFA, weighted                                                                                                                                                                                                                                                                           | 3 (1-6)                     | 2 (1-4.5)                 | 3 (2-6)                       | 4 (3-6)                           | 7.5 (4-9)                          | 4 (2-6)                      |
| <b>Newly developed complications during ICU stay</b>                                                                                                                                                                                                                                     |                             |                           |                               |                                   |                                    |                              |
| Acute coronary syndrome                                                                                                                                                                                                                                                                  | 23 (15.3)                   | 18 (9.9)                  | 210 (9.7)                     | 3 (6.0)                           | 10 (6.0)                           | 54 (5.8)                     |
| Acute kidney injury                                                                                                                                                                                                                                                                      | 17 (11.3)                   | 28 (15.4)                 | 358 (16.5)                    | 14 (28.0)                         | 22 (13.2)                          | 172 (18.6)                   |
| Acute Respiratory Distress Syndrome                                                                                                                                                                                                                                                      | 16 (10.7)                   | 29 (15.9)                 | 350 (16.2)                    | 29 (58.0)                         | 36 (21.6)                          | 51 (5.5)                     |
| Bone marrow failure                                                                                                                                                                                                                                                                      | 2 (1.3)                     | 1 (<1.0)                  | 21 (1.0)                      | 3 (6.0)                           | 3 (1.8)                            | 10 (1.1)                     |
| Cerebrovascular event                                                                                                                                                                                                                                                                    | 11 (7.3)                    | 31 (17.0)                 | 170 (7.8)                     | 6 (12.0)                          | 23 (13.8)                          | 43 (4.6)                     |
| Failure to wean                                                                                                                                                                                                                                                                          | 3 (2.0)                     | 12 (6.6)                  | 159 (7.3)                     | 12 (24.0)                         | 11 (6.6)                           | 24 (2.6)                     |
| Gastro-intestinal bleed                                                                                                                                                                                                                                                                  | 10 (6.7)                    | 14 (7.7)                  | 86 (4.0)                      | 3 (6.0)                           | 7 (4.2)                            | 39 (4.2)                     |
| Liver failure                                                                                                                                                                                                                                                                            | 8 (5.3)                     | 11 (6.0)                  | 111 (5.1)                     | 2 (4.0)                           | 8 (4.8)                            | 26 (2.8)                     |
| Retinal hemorrhage                                                                                                                                                                                                                                                                       | 2 (1.3)                     | 0 (0.0)                   | 6 (<1.0)                      | 1 (2.0)                           | 0 (0.0)                            | 1 (<1.0)                     |
| Sepsis                                                                                                                                                                                                                                                                                   | 20 (13.3)                   | 31 (17.0)                 | 445 (20.5)                    | 15 (30.0)                         | 35 (21.0)                          | 206 (22.2)                   |
| <b>Laboratory values at admission</b>                                                                                                                                                                                                                                                    |                             |                           |                               |                                   |                                    |                              |
| Hb at admission, g/dL                                                                                                                                                                                                                                                                    | 11.5 (3.3)                  | 11.2 (2.5)                | 11.9 (2.6)                    | 12.7 (3.1)                        | 12.0 (2.9)                         | 12.0 (2.7)                   |
| Proportion anemic*, no./no. available (%)                                                                                                                                                                                                                                                | 63/105 (60)                 | 106/148 (72)              | 1,014/1,698 (60)              | 18/41 (44)                        | 69/122 (57)                        | 476/803 (59)                 |
| Platelet count at admission, 10 <sup>9</sup> /L                                                                                                                                                                                                                                          | 250 (164-308)               | 230 (160-306)             | 222 (163-289)                 | 243 (154-295)                     | 192 (148-278)                      | 219 (165-286)                |
| <b>Laboratory values during ICU admission</b>                                                                                                                                                                                                                                            |                             |                           |                               |                                   |                                    |                              |
| Mean Hb during ICU stay                                                                                                                                                                                                                                                                  | 10.6 (3.2)                  | 10.3 (2.4)                | 10.7 (2.1)                    | 11.7 (2.8)                        | 11.0 (2.5)                         | 10.5 (2.2)                   |
| Nadir Hb                                                                                                                                                                                                                                                                                 | 10.2 (3.2)                  | 9.5 (2.7)                 | 10 (2.4)                      | 10.5 (3.0)                        | 10.0 (2.66)                        | 9.8 (2.3)                    |
| Proportion anemic <sup>a</sup>                                                                                                                                                                                                                                                           | 114 (76)                    | 161 (88.5)                | 1,820 (84)                    | 34 (68)                           | 130 (77.8)                         | 785 (84.7)                   |
| Platelet count during ICU stay                                                                                                                                                                                                                                                           | 220 (129-291)               | 243 (159-299)             | 200 (146-262)                 | 243 (187-329)                     | 175 (132-247)                      | 196 (146-255)                |
| Nadir platelet count                                                                                                                                                                                                                                                                     | 210 (123-280)               | 205 (130-281)             | 171 (114-230)                 | 182 (91-251)                      | 147 (103-194)                      | 168 (115-224)                |
| <b>Overall/concomitant transfusion</b>                                                                                                                                                                                                                                                   |                             |                           |                               |                                   |                                    |                              |
| Received RBC                                                                                                                                                                                                                                                                             | 67 (44.7)                   | 61 (33.5)                 | 526 (24.3)                    | 14 (28.0)                         | 32 (19.2)                          | 194 (20.9)                   |
| No. of units transfused in total during ICU stay                                                                                                                                                                                                                                         | 2 (1-3)                     | 2 (1-4)                   | 2 (1-4)                       | 4 (3-6)                           | 2 (1-6)                            | 2 (1-4)                      |
| No. of transfusion events                                                                                                                                                                                                                                                                | 1 (1-2)                     | 1 (1-3)                   | 1 (1-4)                       | 1 (1-6)                           | 1 (1-3)                            | 1 (1-4)                      |
| Received Platelet transfusion                                                                                                                                                                                                                                                            | 2 (1.3)                     | 16 (3.8)                  | 109 (5.0)                     | 5 (10.0)                          | 13 (7.8)                           | 63 (6.8)                     |
| Received Plasma transfusion                                                                                                                                                                                                                                                              | 9 (6.0)                     | 29 (15.9)                 | 241 (11.1)                    | 5 (10.0)                          | 6 (3.6)                            | 47 (5.1)                     |
| Received MTP                                                                                                                                                                                                                                                                             | 1 (<1.0)                    | 1 (<1.0)                  | 21 (1.0)                      | 4 (8.0)                           | 1 (<1.0)                           | 6 (<1.0)                     |
| Received coagulation product                                                                                                                                                                                                                                                             | 9 (6.0)                     | 6 (3.3)                   | 105 (4.8)                     | 6 (12.0)                          | 6 (3.6)                            | 76 (8.2)                     |
| <sup>a</sup> Anemia defined as <12 g/dL for women and <13 g/dL for men, according to WHO-definition. <b>Abbreviations:</b> ARDS, acute respiratory distress syndrome; Hb, hemoglobin; MTP, massive transfusion protocol; RBC, red blood cells; SOFA, sequential organ failure assessment |                             |                           |                               |                                   |                                    |                              |

**eTable 10. Transfusion events per continent**

| <b>Variable</b>                                                 | <b>Total RBC events<br/>N = 1,727</b> | <b>Africa<br/>(N = 89)</b> | <b>Asia<br/>(N = 103)</b> | <b>Europe<br/>(N = 1,024)</b> | <b>South America<br/>(N = 31)</b> | <b>North America<br/>(N = 55)</b> | <b>Oceania<br/>(N = 425)</b> |
|-----------------------------------------------------------------|---------------------------------------|----------------------------|---------------------------|-------------------------------|-----------------------------------|-----------------------------------|------------------------------|
| Time of administration: during daytime hours (07:30am-6:00pm)   | 1063 (62.9)                           | 58 (68.2)                  | 74 (71.8)                 | 686 (67.2)                    | 24 (77.4)                         | 24 (43.6)                         | 197 (49.9)                   |
| Certification level of transfusion requestor                    |                                       |                            |                           |                               |                                   |                                   |                              |
| Intensivist                                                     | 1055 (61.1)                           | 50 (56.2)                  | 60 (58.3)                 | 703 (68.7)                    | 25 (80.6)                         | 41 (74.5)                         | 176 (41.4)                   |
| Specialist non-intensivist practicing ICU                       | 252 (14.6)                            | 19 (21.3)                  | 12 (11.7)                 | 191 (18.7)                    | 3 (9.7)                           | 2 (3.6)                           | 25 (5.9)                     |
| Resident, specialist in training                                | 326 (18.8)                            | 18 (20.2)                  | 18 (17.5)                 | 91 (8.9)                      | 3 (10)                            | 7 (12.7)                          | 189 (44.5)                   |
| Student                                                         | 0 (0.0)                               | 0 (0.0)                    | 0 (0.0)                   | 0 (0.0)                       | 0 (0.0)                           | 0 (0.0)                           | 0 (0.0)                      |
| Nurse                                                           | 12 (0.7)                              | 2 (2.2)                    | 0 (0.0)                   | 9 (0.9)                       | 0 (0.0)                           | 1 (1.8)                           | 0 (0.0)                      |
| Specialist non-intensivist outside ICU                          | 74 (4.3)                              | 0 (0.0)                    | 13 (12.6)                 | 29 (2.8)                      | 0 (0.0)                           | 4 (7.3)                           | 28 (6.6)                     |
| Other                                                           | 8 (<1)                                | 0 (0.0)                    | 0 (0.0)                   | 1 (<1)                        | 0 (0.0)                           | 0 (0.0)                           | 7 (1.6)                      |
| Primary medical specialty of transfusion requestor              |                                       |                            |                           |                               |                                   |                                   |                              |
| Anesthesiology                                                  | 818 (47.7)                            | 44 (51.2)                  | 44 (42.7)                 | 659 (64.8)                    | 0 (0.0)                           | 10 (18.5)                         | 61 (14.4)                    |
| Cardiology                                                      | 27 (1.6)                              | 3 (3.5)                    | 1 (1.0)                   | 16 (1.6)                      | 3 (9.7)                           | 1 (1.9)                           | 3 (0.7)                      |
| Internal medicine                                               | 236 (13.8)                            | 27 (31.4)                  | 9 (8.7)                   | 107 (10.5)                    | 10 (32.3)                         | 13 (24.1)                         | 70 (16.5)                    |
| Intensivist <sup>a</sup>                                        | 390 (22.7)                            | 0 (0.0)                    | 28 (27.2)                 | 74 (7.3)                      | 15 (48.4)                         | 0 (0.0)                           | 273 (64.2)                   |
| Neurology                                                       | 2 (<1)                                | 1 (1.2)                    | 1 (1.0)                   | 0 (0.0)                       | 0 (0.0)                           | 0 (0.0)                           | 0 (0.0)                      |
| Pulmonology                                                     | 48 (2.8)                              | 0 (0.0)                    | 0 (0.0)                   | 44 (4.3)                      | 0 (0.0)                           | 3 (5.6)                           | 1 (0.2)                      |
| Surgery                                                         | 180 (10.5)                            | 10 (11.6)                  | 20 (19.4)                 | 109 (10.7)                    | 3 (9.7)                           | 27 (50.0)                         | 11 (2.6)                     |
| Other (i.e., ED)                                                | 15 (<1)                               | 1 (<1)                     | 0 (0.0)                   | 8 (<1)                        | 0 (0.0)                           | 0 (0.0)                           | 6 (1.4)                      |
| No. of RBC units                                                | 1 (1-2)                               | 2 (1-2)                    | 1 (1-2)                   | 1 (1-2)                       | 2 (2-2)                           | 1 (1-2)                           | 1 (1-1)                      |
| Hemoglobin level                                                |                                       |                            |                           |                               |                                   |                                   |                              |
| Threshold pre-defined, g/dL                                     | 8 (7 - 9)                             | 10 (9 - 11)                | 9 (7-10)                  | 8 (7-9)                       | 12 (10-12)                        | 7 (7-7)                           | 8 (7-8)                      |
| Restrictive ( $\leq$ 7 g/dL)                                    | 299 (17.3)                            | 6 (6.7)                    | 24 (23.3)                 | 184 (18.0)                    | 0 (0.0)                           | 23 (41.8)                         | 62 (14.6)                    |
| Intermediate (7-9 g/dL)                                         | 430 (24.9)                            | 6 (6.7)                    | 5 (4.9)                   | 266 (26.0)                    | 2 (6.5)                           | 1 (1.8)                           | 150 (35.3)                   |
| Liberal ( $\geq$ 9 g/dL)                                        | 459 (26.6)                            | 37 (41.6)                  | 49 (47.6)                 | 308 (30.1)                    | 29 (93.5)                         | 2 (3.6)                           | 34 (10.5)                    |
| Missing                                                         | 539 (31.2)                            | 40 (45.0)                  | 25 (24.3)                 | 266 (26.0)                    | 0 (0.0)                           | 29 (52.7)                         | 179 (42.1)                   |
| Prior transfusion, g/dL                                         | 7.7 (1.6)                             | 8.6 (2.0)                  | 7.9 (2.0)                 | 7.6 (1.6)                     | 8.2 (1.8)                         | 7.3 (1.4)                         | 7.6 (1.2)                    |
| Post transfusion, g/dL                                          | 9.1 (1.5)                             | 9.8 (1.6)                  | 9.7 (2.0)                 | 9.1 (1.5)                     | 10.2 (1.6)                        | 8.7 (1.2)                         | 8.7 (1.2)                    |
| As part of massive transfusion protocol                         | 43 (2.5)                              | 1 (1.1)                    | 1 (1.0)                   | 25 (2.4)                      | 6 (19.4)                          | 1 (1.8)                           | 9 (2.1)                      |
| Whole blood (no isolated RBC available)                         | 54 (3.1)                              | 43 (48.3)                  | 7 (6.8)                   | 1 (0.1)                       | 0 (0.0)                           | 3 (5.5)                           | 0 (0.0)                      |
| Reason for RBC transfusion ( <i>multiple options possible</i> ) |                                       |                            |                           |                               |                                   |                                   |                              |
| Low Hb value                                                    | 1412 (81.8)                           | 63 (70.8)                  | 79 (76.7)                 | 827 (80.8)                    | 20 (64.5)                         | 48 (87.3)                         | 375 (88.2)                   |
| Active bleeding                                                 | 479 (27.7)                            | 26 (29.2)                  | 29 (28.2)                 | 289 (28.2)                    | 15 (48.4)                         | 23 (41.8)                         | 97 (22.8)                    |
| Age of patient                                                  | 60 (3.5)                              | 12 (13.5)                  | 2 (1.9)                   | 35 (3.4)                      | 1 (3.2)                           | 4 (7.3)                           | 6 (1.4)                      |
| Exchange transfusion                                            | 2 (<1)                                | 0 (0.0)                    | 0 (0.0)                   | 2 (0.2)                       | 0 (0.0)                           | 0 (0.0)                           | 0 (0.0)                      |

| Variable                                                                                                                                                                                                                                                                                                                                                                                                                                                                                                                                         | Total RBC events<br>N = 1,727 | Africa<br>(N = 89) | Asia<br>(N = 103) | Europe<br>(N = 1,024) | South America<br>(N = 31) | North America<br>(N = 55) | Oceania<br>(N = 425) |
|--------------------------------------------------------------------------------------------------------------------------------------------------------------------------------------------------------------------------------------------------------------------------------------------------------------------------------------------------------------------------------------------------------------------------------------------------------------------------------------------------------------------------------------------------|-------------------------------|--------------------|-------------------|-----------------------|---------------------------|---------------------------|----------------------|
| Hemodynamic instability                                                                                                                                                                                                                                                                                                                                                                                                                                                                                                                          | 406 (23.5)                    | 27 (30.3)          | 21 (20.4)         | 265 (25.9)            | 11 (35.5)                 | 17 (30.9)                 | 65 (15.3)            |
| Improving general status                                                                                                                                                                                                                                                                                                                                                                                                                                                                                                                         | 142 (8.2)                     | 29 (32.6)          | 3 (2.9)           | 92 (9.0)              | 1 (3.2)                   | 1 (1.8)                   | 16 (3.8)             |
| Improving peripheral O <sub>2</sub>                                                                                                                                                                                                                                                                                                                                                                                                                                                                                                              | 115 (6.7)                     | 18 (20.2)          | 8 (7.8)           | 81 (7.9)              | 0 (0.0)                   | 1 (1.8)                   | 7 (1.6)              |
| Improving weaning                                                                                                                                                                                                                                                                                                                                                                                                                                                                                                                                | 43 (2.5)                      | 4 (4.5)            | 0 (0.0)           | 34 (3.3)              | 1 (3.2)                   | 1 (1.8)                   | 3 (0.7)              |
| (New) coronary ischemia                                                                                                                                                                                                                                                                                                                                                                                                                                                                                                                          | 69 (4.0)                      | 1 (1.1)            | 3 (2.9)           | 56 (5.5)              | 0 (0.0)                   | 5 (9.1)                   | 4 (0.9)              |
| Part of clinical trial                                                                                                                                                                                                                                                                                                                                                                                                                                                                                                                           | 6 (<1)                        | 1 (1.1)            | 0 (0.0)           | 3 (0.3)               | 0 (0.0)                   | 0 (0.0)                   | 2 (0.5)              |
| Pre-surgery                                                                                                                                                                                                                                                                                                                                                                                                                                                                                                                                      | 67 (3.9)                      | 9 (10.1)           | 5 (4.9)           | 34 (3.3)              | 1 (3.2)                   | 3 (5.5)                   | 15 (3.5)             |
| Other                                                                                                                                                                                                                                                                                                                                                                                                                                                                                                                                            | 47 (2.7)                      | 0 (0.0)            | 3 (2.9)           | 16 (1.6)              | 0 (0.0)                   | 2 (3.6)                   | 26 (6.1)             |
| No. of reasons                                                                                                                                                                                                                                                                                                                                                                                                                                                                                                                                   | 1 (1-2)                       | 2 (1-3)            | 1 (1-2)           | 1 (1-2)               | 2 (1-2)                   | 2 (1-3)                   | 1 (1-2)              |
| <b>Trigger for RBC transfusion (multiple options possible)</b>                                                                                                                                                                                                                                                                                                                                                                                                                                                                                   |                               |                    |                   |                       |                           |                           |                      |
| Acidosis                                                                                                                                                                                                                                                                                                                                                                                                                                                                                                                                         | 204 (11.8)                    | 16 (18.0)          | 10 (9.7)          | 135 (13.2)            | 2 (6.5)                   | 9 (16.4)                  | 32 (7.5)             |
| Arrhythmia                                                                                                                                                                                                                                                                                                                                                                                                                                                                                                                                       | 70 (4.1)                      | 8 (9.0)            | 4 (3.9)           | 52 (5.1)              | 0 (0.0)                   | 1 (1.8)                   | 5 (1.2)              |
| ECG changes                                                                                                                                                                                                                                                                                                                                                                                                                                                                                                                                      | 23 (1.3)                      | 5 (5.6)            | 2 (1.9)           | 13 (1.3)              | 1 (3.2)                   | 0 (0.0)                   | 2 (0.5)              |
| Hypotension                                                                                                                                                                                                                                                                                                                                                                                                                                                                                                                                      | 728 (42.2)                    | 39 (43.8)          | 60 (58.3)         | 455 (44.4)            | 19 (61.3)                 | 20 (36.4)                 | 135 (31.8)           |
| Increased lactate levels (>2 mmol/L)                                                                                                                                                                                                                                                                                                                                                                                                                                                                                                             | 308 (17.8)                    | 14 (15.7)          | 17 (16.5)         | 213 (20.8)            | 12 (38.7)                 | 10 (18.2)                 | 42 (9.9)             |
| SVO <sub>2</sub> < 65%                                                                                                                                                                                                                                                                                                                                                                                                                                                                                                                           | 36 (2.1)                      | 0 (0.0)            | 1 (1.0)           | 31 (3.0)              | 0 (0.0)                   | 0 (0.0)                   | 4 (0.9)              |
| SCVO <sub>2</sub> < 65%                                                                                                                                                                                                                                                                                                                                                                                                                                                                                                                          | 30 (1.7)                      | 11 (12.4)          | 1 (1.0)           | 18 (1.8)              | 0 (0.0)                   | 0 (0.0)                   | 0 (0.0)              |
| Tachycardia                                                                                                                                                                                                                                                                                                                                                                                                                                                                                                                                      | 474 (27.4)                    | 33 (37.1)          | 45 (43.7)         | 306 (29.9)            | 11 (35.5)                 | 22 (40.0)                 | 57 (13.4)            |
| Other                                                                                                                                                                                                                                                                                                                                                                                                                                                                                                                                            | 66 (3.8)                      | 3 (3.4)            | 3 (2.9)           | 33 (3.2)              | 1 (3.2)                   | 5 (9.1)                   | 21 (4.9)             |
| No physiological trigger affected the decision to transfuse                                                                                                                                                                                                                                                                                                                                                                                                                                                                                      | 682 (39.5)                    | 26 (29.2)          | 27 (26.2)         | 381 (37.2)            | 4 (12.9)                  | 19 (34.5)                 | 225 (52.9)           |
| No. of triggers                                                                                                                                                                                                                                                                                                                                                                                                                                                                                                                                  | 1 (0-2)                       | 1 (0-2)            | 1 (0-2)           | 1 (0-2)               | 2 (0-2)                   | 1 (0-2)                   | 0 (0-0)              |
| <p><b>Abbreviations:</b> ECG, electrocardiogram; ED, emergency department; Hb, hemoglobin; ICU, intensive care unit; RBC, red blood cells; SVO<sub>2</sub>, venous oxygen saturation; SCVO<sub>2</sub>, central venous oxygen saturation</p> <p><sup>a</sup> Intensivist training differs worldwide; whereas in some countries, training starts with another medical specialty (i.e., surgery, anesthesiology, internal medicine), some countries offer a special intensivist training program. The latter is hereby noted at "intensivist".</p> |                               |                    |                   |                       |                           |                           |                      |



**eFigure 3. Reasons and triggers per continent**

| Continent  | Africa | Asia | Europe | South America | North America | Oceania | Total |
|------------|--------|------|--------|---------------|---------------|---------|-------|
| No. events | 89     | 103  | 1,024  | 31            | 55            | 425     | 1,727 |

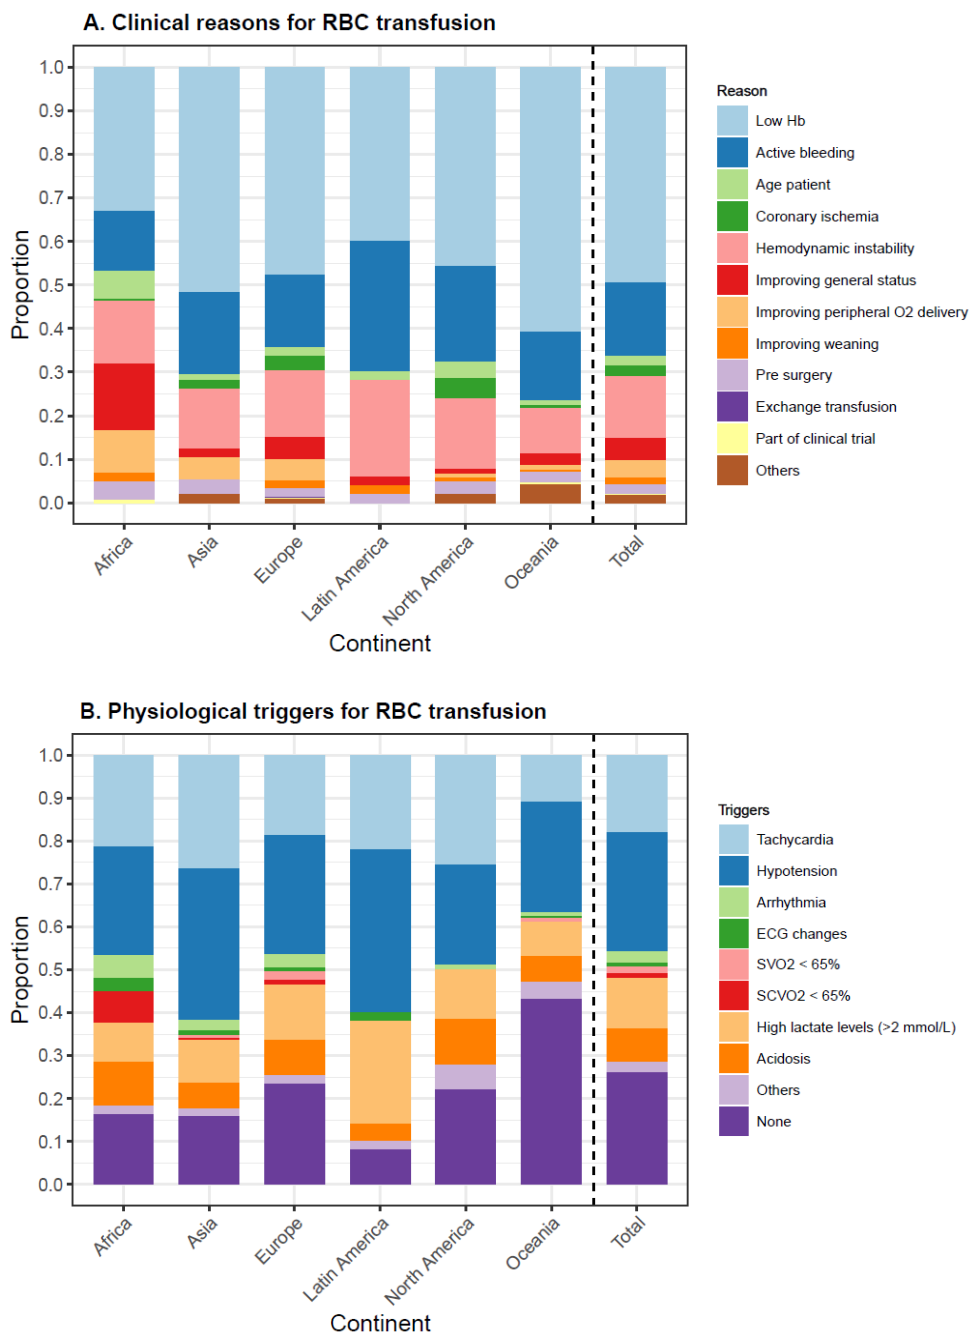

This figure shows the proportion of listed clinical reasons for RBC transfusion (**Panel A**) and the proportion of listed physiological triggers for RBC transfusion (**Panel B**) for each continent and in total. The heading table shows the number of RBC transfusion events within each continent and in total. Absolute patient numbers can be found in eTable 9.

**eFigure 4. Hemoglobin before transfusion in transfused patients, by continent**

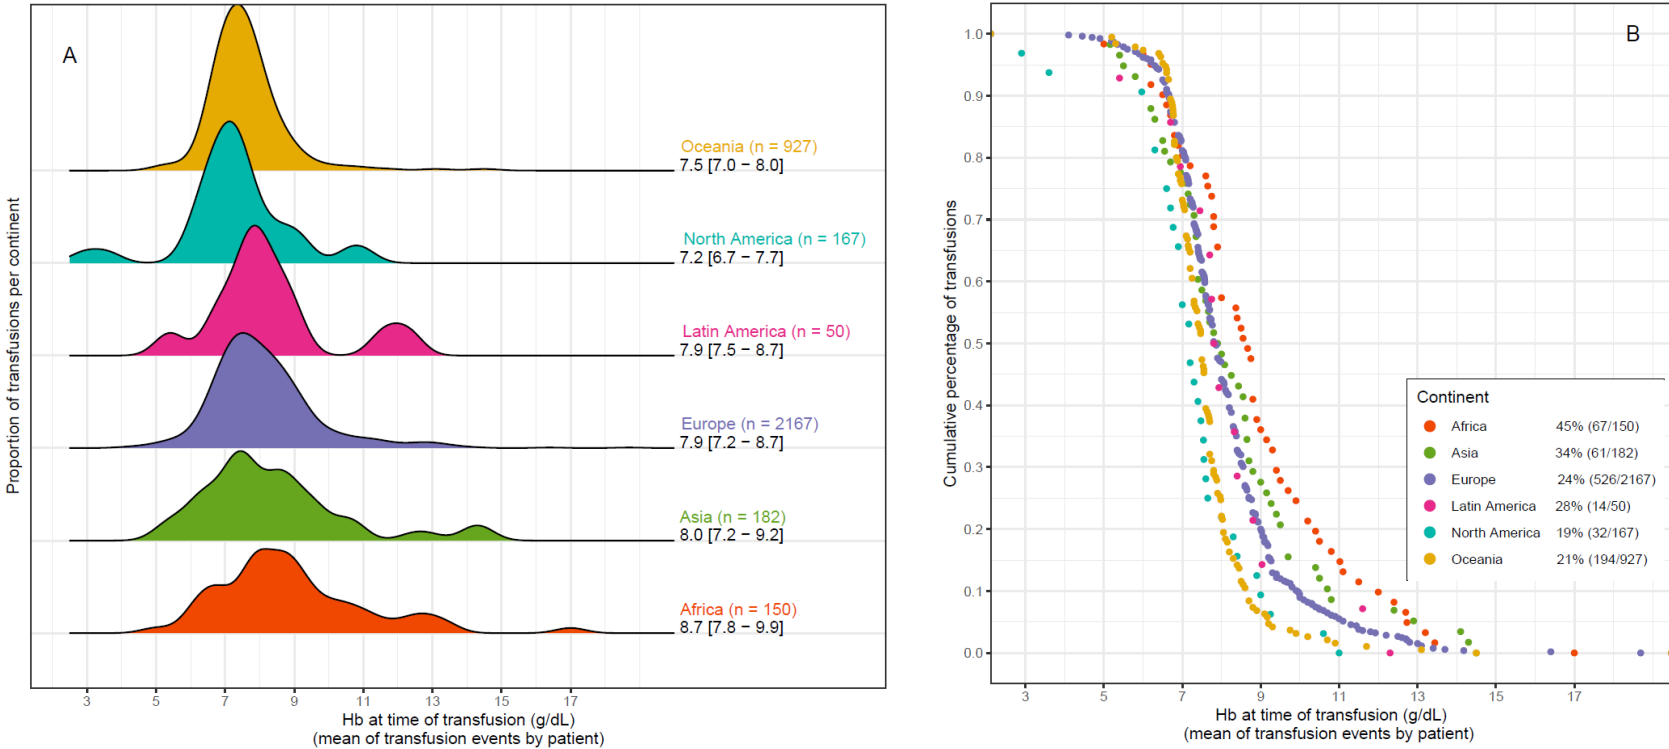

Hemoglobin before transfusion in transfused patients, by continent. For patients with multiple transfusions, the mean of the pre-transfusion Hb across different transfusions was calculated. **Panel A:** Density plots representing relative transfusion rate for different hemoglobin levels. Numerical values by continent are the total number of patients and the median [25<sup>th</sup> to 75<sup>th</sup> percentile] hemoglobin before transfusion across all patients. **Panel B:** Cumulative proportion of transfusions at different Hb values (for example, among patients in Africa approximately 25% of transfusions occurred at a hemoglobin of 10 g/dL or higher.). Numerical values are the number of patients that were transfused.

**eTable 11. Transfusion reasons + triggers as stratified per threshold**

| Variable                                                                                                                                                                                                                                                                                     | Restrictive<br>(N = 299) | Intermediate<br>(N = 430) | Liberal<br>(N = 459) | Unadjusted<br>P-value |
|----------------------------------------------------------------------------------------------------------------------------------------------------------------------------------------------------------------------------------------------------------------------------------------------|--------------------------|---------------------------|----------------------|-----------------------|
| Time of administration during daytime hours (07:30am-6:00pm)                                                                                                                                                                                                                                 | 198 (66.9)               | 246 (57.2)                | 312 (68.0)           | <0.01                 |
| Certification level of transfusion requestor                                                                                                                                                                                                                                                 |                          |                           |                      |                       |
| Intensivist                                                                                                                                                                                                                                                                                  | 201 (67.2)               | 226 (52.6)                | 314 (68.4)           | <0.001                |
| Specialist non-intensivist practicing ICU                                                                                                                                                                                                                                                    | 38 (12.7)                | 77 (17.9)                 | 62 (13.5)            | 0.08                  |
| Resident, specialist in training                                                                                                                                                                                                                                                             | 48 (16.1)                | 115 (26.8)                | 60 (13.1)            | <0.001                |
| Student                                                                                                                                                                                                                                                                                      | 0 (0.0)                  | 0 (0.0)                   | 0 (0.0)              | 1.00                  |
| Nurse                                                                                                                                                                                                                                                                                        | 6 (2.0)                  | 2 (0.5)                   | 1 (0.2)              | 0.01                  |
| Specialist non-intensivist outside ICU                                                                                                                                                                                                                                                       | 6 (2.0)                  | 8 (1.9)                   | 22 (4.8)             | 0.02                  |
| Other                                                                                                                                                                                                                                                                                        | 0 (0.0)                  | 2 (0.5)                   | 0 (0.0)              | 0.13                  |
| Primary medical specialty of transfusion requestor                                                                                                                                                                                                                                           |                          |                           |                      |                       |
| Anesthesiology                                                                                                                                                                                                                                                                               | 112 (38.1)               | 176 (41.1)                | 294 (64.2)           | <0.001                |
| Cardiology                                                                                                                                                                                                                                                                                   | 3 (1.0)                  | 11 (2.6)                  | 5 (1.1)              | 0.14                  |
| Internal medicine                                                                                                                                                                                                                                                                            | 70 (23.8)                | 31 (7.2)                  | 32 (7.0)             | <0.001                |
| Intensivist <sup>a</sup>                                                                                                                                                                                                                                                                     | 79 (26.9)                | 144 (33.6)                | 63 (13.8)            | <0.001                |
| Neurology                                                                                                                                                                                                                                                                                    | 0 (0.0)                  | 0 (0.0)                   | 1 (0.2)              | 0.45                  |
| Pulmonology                                                                                                                                                                                                                                                                                  | 13 (4.4)                 | 19 (4.4)                  | 2 (0.4)              | <0.001                |
| Surgery                                                                                                                                                                                                                                                                                      | 14 (4.8)                 | 44 (10.3)                 | 61 (13.3)            | 0.001                 |
| Other (i.e. ED)                                                                                                                                                                                                                                                                              | 3 (1.0)                  | 3 (0.7)                   | 0 (0.0)              | 0.13                  |
| No. of RBC units                                                                                                                                                                                                                                                                             | 1 (1-2)                  | 1 (1-2)                   | 1 (1-2)              |                       |
| Hemoglobin levels                                                                                                                                                                                                                                                                            |                          |                           |                      |                       |
| Threshold pre-defined, g/dL                                                                                                                                                                                                                                                                  | 7 (7-7)                  | 8 (8-8)                   | 9 (9-10)             | <0.001                |
| Prior transfusion, g/dL                                                                                                                                                                                                                                                                      | 6.95 (1.42)              | 7.45 (1.18)               | 8.48 (1.50)          | <0.001                |
| Post transfusion, g/dL                                                                                                                                                                                                                                                                       | 8.35 (1.45)              | 8.80 (1.22)               | 9.85 (1.38)          | <0.001                |
| As part of massive transfusion protocol                                                                                                                                                                                                                                                      | 4 (1.3)                  | 17 (4.0)                  | 14 (3.1)             |                       |
| Whole blood (no isolated RBC available)                                                                                                                                                                                                                                                      | 4 (1.3)                  | 3 (0.7)                   | 23 (5.0)             |                       |
| Reason for RBC transfusion ( <i>multiple options possible</i> )                                                                                                                                                                                                                              |                          |                           |                      |                       |
| Low Hb value                                                                                                                                                                                                                                                                                 | 259 (86.6)               | 370 (86.0)                | 365 (79.5)           | <0.01                 |
| Active bleeding                                                                                                                                                                                                                                                                              | 78 (26.1)                | 100 (23.3)                | 141 (30.7)           | 0.04                  |
| Age of patient                                                                                                                                                                                                                                                                               | 2 (0.7)                  | 10 (2.3)                  | 22 (4.8)             | <0.01                 |
| Exchange transfusion                                                                                                                                                                                                                                                                         | 2 (0.7)                  | 0 (0.0)                   | 0 (0.0)              | 0.051                 |
| Hemodynamic instability                                                                                                                                                                                                                                                                      | 53 (17.7)                | 76 (17.7)                 | 131 (28.5)           | <0.001                |
| Improving general state                                                                                                                                                                                                                                                                      | 13 (4.3)                 | 25 (5.8)                  | 46 (10.0)            | <0.01                 |
| Improving peripheral O <sub>2</sub>                                                                                                                                                                                                                                                          | 15 (5.0)                 | 15 (3.5)                  | 49 (10.7)            | <0.001                |
| Improving weaning                                                                                                                                                                                                                                                                            | 5 (1.7)                  | 11 (2.6)                  | 10 (2.2)             | 0.72                  |
| (New) coronary ischemia                                                                                                                                                                                                                                                                      | 10 (3.3)                 | 13 (3.0)                  | 38 (8.3)             | <0.001                |
| Part of clinical trial                                                                                                                                                                                                                                                                       | 0 (0.0)                  | 0 (0.0)                   | 2 (0.4)              | 0.20                  |
| Pre-surgery                                                                                                                                                                                                                                                                                  | 14 (4.7)                 | 10 (2.3)                  | 20 (4.4)             | 0.16                  |
| Other                                                                                                                                                                                                                                                                                        | 6 (2.0)                  | 11 (2.6)                  | 7 (1.5)              | 0.55                  |
| No. of reasons                                                                                                                                                                                                                                                                               | 1 (1-2)                  | 1 (1-2)                   | 2 (1-2)              | <0.001                |
| Trigger for RBC transfusion ( <i>multiple options possible</i> )                                                                                                                                                                                                                             |                          |                           |                      |                       |
| Acidosis                                                                                                                                                                                                                                                                                     | 31 (10.4)                | 31 (7.2)                  | 62 (13.5)            | <0.01                 |
| Arrhythmia                                                                                                                                                                                                                                                                                   | 11 (3.7)                 | 10 (2.3)                  | 33 (7.2)             | <0.01                 |
| ECG changes                                                                                                                                                                                                                                                                                  | 4 (1.3)                  | 2 (0.5)                   | 9 (2.0)              | 0.14                  |
| Hypotension                                                                                                                                                                                                                                                                                  | 104 (34.8)               | 155 (36.0)                | 221 (48.1)           | <0.001                |
| Increased lactate levels (>2 mmol/L)                                                                                                                                                                                                                                                         | 41 (13.7)                | 64 (14.9)                 | 100 (21.8)           | <0.01                 |
| SVO <sub>2</sub> < 65%                                                                                                                                                                                                                                                                       | 1 (0.3)                  | 8 (1.9)                   | 15 (3.3)             | 0.02                  |
| SCVO <sub>2</sub> < 65%                                                                                                                                                                                                                                                                      | 2 (0.7)                  | 6 (1.4)                   | 11 (2.4)             | 0.17                  |
| Tachycardia                                                                                                                                                                                                                                                                                  | 83 (27.8)                | 103 (24.0)                | 131 (28.5)           | 0.27                  |
| Other                                                                                                                                                                                                                                                                                        | 14 (4.7)                 | 8 (1.9)                   | 20 (4.4)             | 0.06                  |
| No physiological trigger affected the decision to transfuse                                                                                                                                                                                                                                  | 136 (45.5)               | 196 (45.6)                | 152 (33.1)           | <0.001                |
| No. of triggers                                                                                                                                                                                                                                                                              | 1 (0-2)                  | 1 (0-2)                   | 1 (0-2)              | <0.001                |
| <b>Abbreviations:</b> ECG, electrocardiogram; ED, emergency department; Hb, hemoglobin; ICU, intensive care unit; RBC, red blood cells; SVO <sub>2</sub> , venous oxygen saturation; SCVO <sub>2</sub> , central venous oxygen saturation                                                    |                          |                           |                      |                       |
| <sup>a</sup> Intensivist training differs worldwide; whereas in some countries, training starts with another medical specialty (i.e., surgery, anesthesiology, internal medicine), some countries offer a special intensivist training program. The latter is hereby noted as "intensivist". |                          |                           |                      |                       |

eFigure 5. Reasons and triggers per threshold

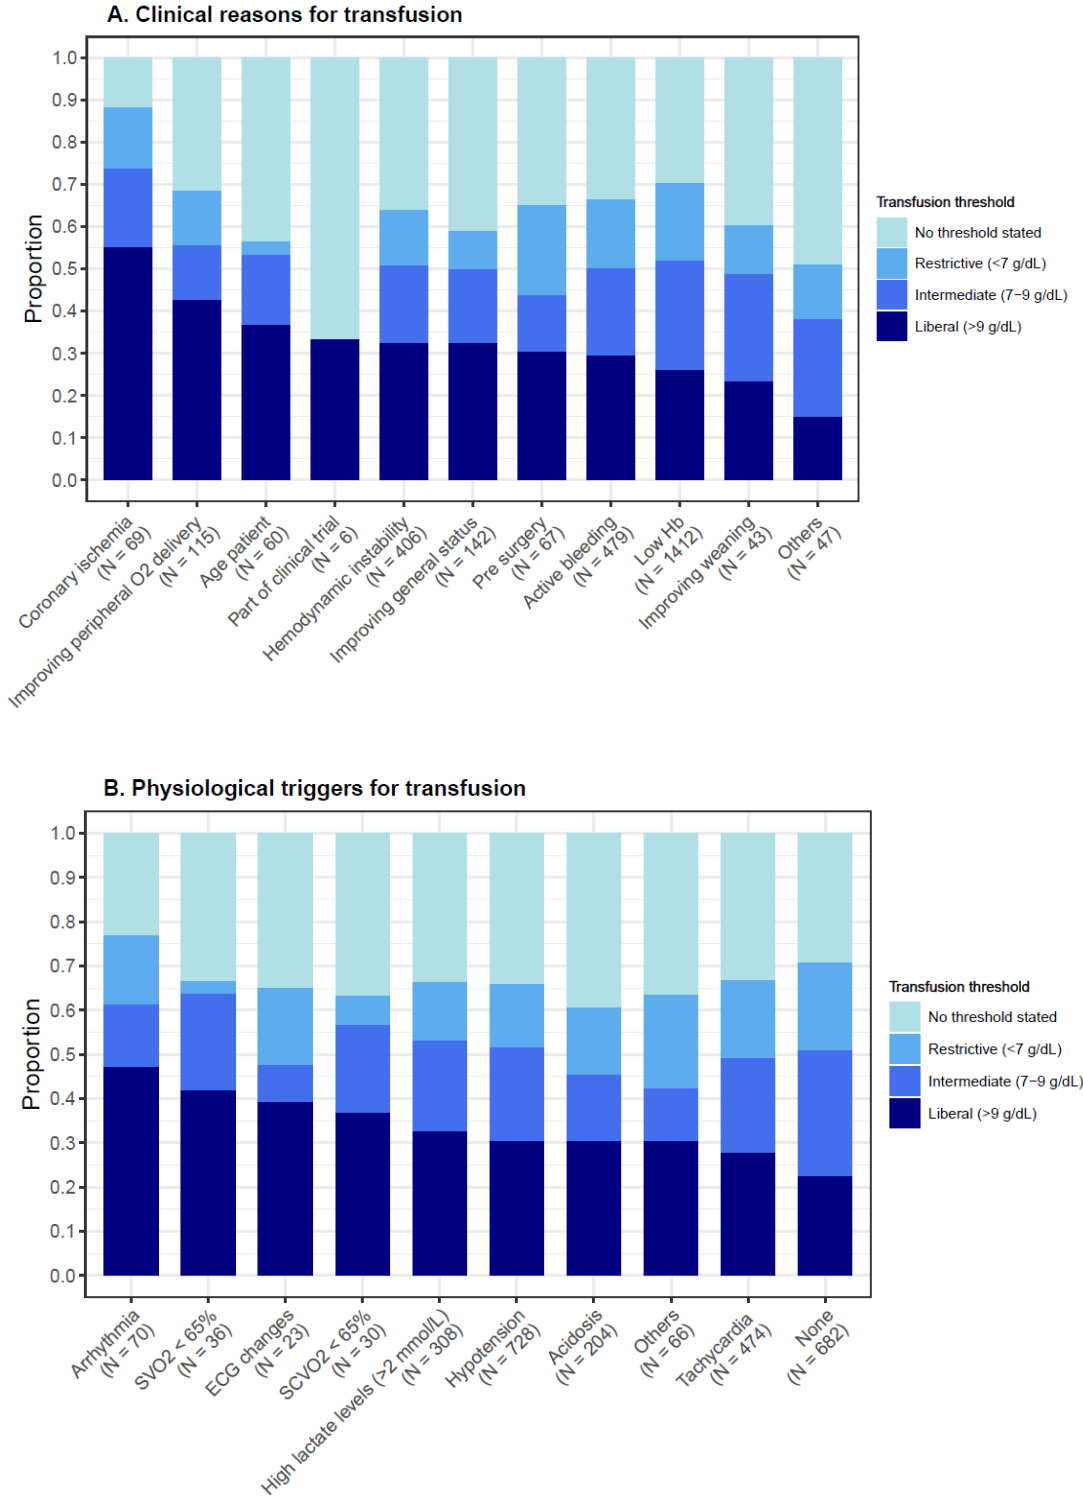

This figure shows the differences in proportion of transfusion thresholds for both clinical reasons for RBC transfusion (Panel A) and the listed physiological triggers for RBC transfusion (Panel B). Absolute numbers can be found in eTable 10.

## eMethods 2. Predefined sub-questions and secondary analyses

Currently scheduled sub-questions and secondary analyses include:

- National transfusion behavior
- The consistency of transfusion practice in non-bleeding ICU patients; does length of stay effect transfusion policy
- RBC transfusion in septic patients
- Thrombocyte course and thrombocytopenia in the ICU
- Platelet transfusion in the ICU
- Transfusion behavior vs sex differences
- RBC transfusion in the elderly
- Influence of transfusion on mortality
- Practices of plasma transfusion in the ICU
- Transfusion practices in patients with shock
- Transfusion practices in hematological patients

Predefined secondary objectives include:

- To evaluate which other triggers such as hemodynamic or comorbidities influence RBC transfusion practice.
- To compare platelet count in transfused patients with platelet to nadir platelet count in non-transfused patients
- To compare INR (or PT) in transfused patients with plasma to nadir level of INR (PT) in non-transfused patients
- To compare transfusion practice between different subgroups of patients including shock septic, hematology, cardiovascular disease without acute coronary diseases and coronary disease
- Association between restrictive and liberal RBC transfusion strategy on ICU length of stay and 28-day mortality
- Association of platelet target transfusion strategy on ICU length of stay and 28-day mortality
- Association between restrictive and liberal coagulation factor administration strategy on ICU length of stay and 28-day mortality

For further sub-studies and secondary analyses please contact [inputstudy@amsterdamumc.nl](mailto:inputstudy@amsterdamumc.nl) . The requestor will then receive the data request form, data dictionary and list of unavailable topics. The data request form includes a short proposal, including statistical analysis plan and mock figures and tables. This request will then be reviewed by the InPUT coordinating team (Amsterdam UMC) and, in case the application is considered sufficient, by the complete steering committee. If the steering committee approves the proposal, dummy data (either mock data or data from the center itself) will be shared with the requestor. For regulatory and legal purposes, the full dataset cannot be shared. Therefore, data analysis can either be done 1) on the data provided by the requesting institute, or 2) on the full dataset on the servers of Amsterdam UMC using analysis syntax prepared by the requestors on mock data. This dataset can be used to develop a syntax for data analyses. This syntax will be revised and reviewed by one of the statisticians or methodologists part of the InPUT study team. Lastly, after the syntax is performed by the InPUT study team, the results will be shared with the requestors to draft the manuscript. Lastly, the manuscript has to be reviewed by the steering committee prior to submission. In every stage, one round of feedback is possible.

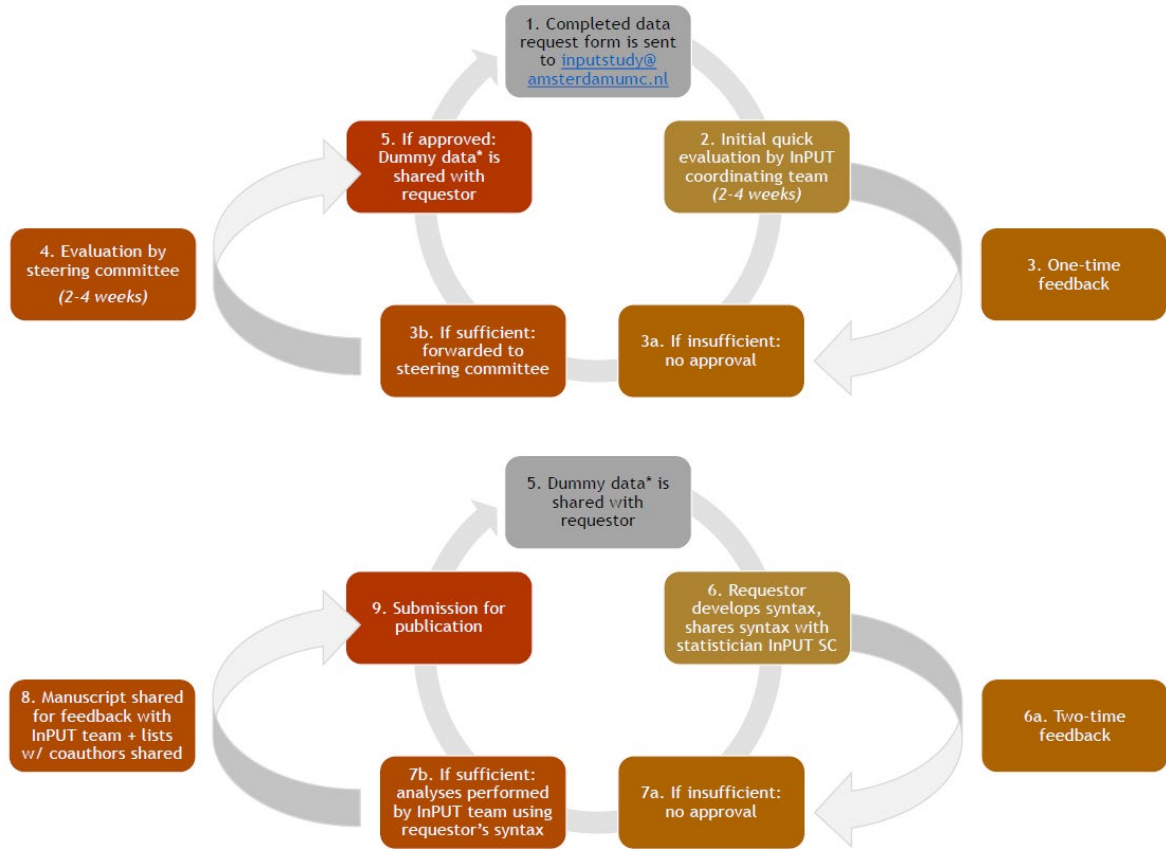

Supplement: jama-e2320737-s001.pdf [file jama-e2320737-s001.pdf]
