# Supplementary material
Source: PubMed Central journal article supplement (PMC10570913)
Supplement: jama-e2320737-s003.pdf [file jama-e2320737-s003.pdf]

\*First name, last name, and suffix (if applicable) are required and will appear in PubMed.

| <b>*Group Name(s): InPUT Study Group</b> |                   |                              |                  |                                                                                                                                                                |                                            |                                                         |                                                                                            |
|------------------------------------------|-------------------|------------------------------|------------------|----------------------------------------------------------------------------------------------------------------------------------------------------------------|--------------------------------------------|---------------------------------------------------------|--------------------------------------------------------------------------------------------|
| <b>*First Name and Middle Initial(s)</b> | <b>*Last Name</b> | <b>*Suffix (eg, Jr, III)</b> | Academic Degrees | Institution                                                                                                                                                    | Location (city, state/province, country)   | Role or Contribution, eg, chair, principal investigator | Group (if more than 1 Group listed in the byline and/or Subgroup (eg, Steering Committee)) |
| Alisa                                    | Higgins           |                              |                  | Monash University, Australian and New Zealand Intensive Care Research Centre, School of Public Health and Preventive Medicine, Monash University               | 553 St Kilda Rd, Melbourne 3004, Australia | Local Investigator                                      |                                                                                            |
| Ary                                      | Serpa Neto        |                              |                  | Monash University, Australian and New Zealand Intensive Care Research Centre, School of Public Health and Preventive Medicine, Monash University               | Prahran, Victoria, Australia               | Local Investigator                                      |                                                                                            |
| Karina                                   | Brady             |                              |                  | Monash University, Transfusion Research Unit, School of Public Health and Preventive Medicine, Monash University                                               | Melbourne, Victoria, Australia             | Local Investigator                                      |                                                                                            |
| Erica                                    | Wood              |                              |                  | Monash University, School of Public Health and Preventive Medicine, Monash University                                                                          | Victoria, Australia                        | Local Investigator                                      |                                                                                            |
| Alexis                                   | Poole             |                              |                  | Monash University, Australian and New Zealand Intensive Care Research Centre, School of Public Health and Preventive Medicine, Monash University               | Prahran, Victoria, Australia               | Local Investigator                                      |                                                                                            |
| Tony                                     | Trapani           |                              |                  | Monash University, Australian and New Zealand Intensive Care Research Centre (ANZIC-RC), School of Public Health and Preventative Medicine, Monash University, | Melbourne, Victoria, Australia             | Local Investigator                                      |                                                                                            |

Supplemental Online Content: Nonauthor Collaborators

\*First name, last name, and suffix (if applicable) are required and will appear in PubMed.

| *First Name and Middle Initial(s) | *Last Name    | *Suffix (eg, Jr, III) | Academic Degrees | Institution                                            | Location (city, state/province, country)     | Role or Contribution, eg, chair, principal investigator | Group (if more than 1 Group listed in the byline) and/or Subgroup (eg, Steering Committee) |
|-----------------------------------|---------------|-----------------------|------------------|--------------------------------------------------------|----------------------------------------------|---------------------------------------------------------|--------------------------------------------------------------------------------------------|
| Meredith                          | Young         |                       |                  | Alfred hospital, Alfred Health                         | Melbourne, Victoria, Australia               | Local Investigator                                      |                                                                                            |
| Jamie                             | Cooper        |                       |                  | Alfred hospital, Alfred Health                         | Melbourne, Victoria, Australia               | Local Investigator                                      |                                                                                            |
| Paul                              | Secombe       |                       |                  | Alice Springs Hospital                                 | Alice Springs, Northern Territory, Australia | Local Investigator                                      |                                                                                            |
| Graham                            | Reece         |                       |                  | Blacktown Hospital                                     | Blacktown, New South Wales, Australia        | Local Investigator                                      |                                                                                            |
| Prashanti                         | Marella       |                       |                  | Caboolture Hospital, Intensive Care Department         | Caboolture, Queensland, Australia            | Local Investigator                                      |                                                                                            |
| David                             | Brewster      |                       |                  | Cabrini Hospital, Cabrini Health                       | Malvern, Victoria, Australia                 | Local Investigator                                      |                                                                                            |
| Alan                              | Rashid        |                       |                  | Calvary Mater Newcastle Hospital, Calvary Mater        | Waratah, New South Wales, Australia          | Local Investigator                                      |                                                                                            |
| Ruwan                             | Suwandarathne |                       |                  | Canberra Hospital, Australian National University      | Canberra, Australia                          | Local Investigator                                      |                                                                                            |
| Raman                             | Azad          |                       |                  | Coffs Harbour Health Campus                            | Coffs Harbour, Australia                     | Local Investigator                                      |                                                                                            |
| Jonathan                          | Barrett       |                       |                  | Epworth Richmond, Epworth HealthCare                   | Richmond, Victoria, Australia                | Local Investigator                                      |                                                                                            |
| Elisha                            | Turner        |                       |                  | Gosford Hospital                                       | Gosford, New South Wales, Australia          | Local Investigator                                      |                                                                                            |
| Amber-Louise                      | Poulter       |                       |                  | John Hunter Hospital                                   | Newcastle, Australia                         | Local Investigator                                      |                                                                                            |
| Lixian                            | Chen          |                       |                  | Launceston General Hospital                            | Launceston, Tasmania, Australia              | Local Investigator                                      |                                                                                            |
| Vishwanath                        | Biradar       |                       |                  | Lyell McEwin Hospital, SA Health Lyell McEwin Hospital | Adelaide, South Australia, Australia         | Local Investigator                                      |                                                                                            |
| Christina                         | Whitehead     |                       |                  | Nepean Hospital, Nepean Hospital                       | Kingswood, New South Wales, Australia        | Local Investigator                                      |                                                                                            |
| Sandra                            | Peake         |                       |                  | Queen Elizabeth Hospital, The Queen Elizabeth Hospital | Woodville South, South Australia, Australia  | Local Investigator                                      |                                                                                            |

## Supplemental Online Content: Nonauthor Collaborators

\*First name, last name, and suffix (if applicable) are required and will appear in PubMed.

| *First Name and Middle Initial(s) | *Last Name  | *Suffix (eg, Jr, III) | Academic Degrees | Institution                                                             | Location (city, state/province, country)   | Role or Contribution, eg, chair, principal investigator | Group (if more than 1 Group listed in the byline) and/or Subgroup (eg, Steering Committee) |
|-----------------------------------|-------------|-----------------------|------------------|-------------------------------------------------------------------------|--------------------------------------------|---------------------------------------------------------|--------------------------------------------------------------------------------------------|
| Alexis                            | Tabah       |                       |                  | Redcliffe hospital, Intensive Care Department                           | Redcliffe, Queensland Australia            | Local Investigator                                      |                                                                                            |
| Stephanie                         | O'Connor    |                       |                  | Royal Adelaide Hospital, Royal Adelaide Hospital                        | Adelaide, South Australia, Australia       | Local Investigator                                      |                                                                                            |
| Michael                           | Reade       |                       |                  | Royal Brisbane and Womens Hospital                                      | Brisbane, Queensland, Australia            | Local Investigator                                      |                                                                                            |
| Guido                             | Janssen     |                       |                  | Royal Darwin Hospital, Royal Darwin Hospital                            | Tiwi, Northern Territory, Australia        | Local Investigator                                      |                                                                                            |
| Richard                           | McAllister  |                       |                  | Royal Hobart Hospital, Royal Hobart Hospital                            | Hobart, Tasmania, Australia                | Local Investigator                                      |                                                                                            |
| Katherine                         | Triplett    |                       |                  | Royal Prince Alfred, The Royal Prince Alfred Hospital                   | Camperdown, New South Wales, Australia     | Local Investigator                                      |                                                                                            |
| David                             | Bowen       |                       |                  | Ryde Hospital                                                           | Eastwood, New South Wales, Australia       | Local Investigator                                      |                                                                                            |
| Hergen                            | Buscher     |                       |                  | St Vincent Hospital - Sydney, St Vincent's Hospital, Sydney             | Darlinghurst, New South Wales, Australia   | Local Investigator                                      |                                                                                            |
| John                              | Santamaria  |                       |                  | St Vincent Hospital - Melbourne, St Vincent's Hospital Melbourne        | Melbourne, Victoria, Australia             | Local Investigator                                      |                                                                                            |
| Dinesh                            | Parmar      |                       |                  | The Prince Charles Hospital, The Prince Charles Hospital                | Chermside, Queensland, Australia           | Local Investigator                                      |                                                                                            |
| Paul                              | Power       |                       |                  | University Geelong Hospital, Barwon Health, University Hospital Geelong | Geelong, Victoria, Australia               | Local Investigator                                      |                                                                                            |
| Craig                             | French      |                       |                  | Western Health, Department of Intensive Care, Western Health            | Footscray, Victoria, Australia             | Local Investigator                                      |                                                                                            |
| David                             | Bowen       |                       |                  | Westmead Hospital                                                       | Sydney, New South Wales, Australia         | Local Investigator                                      |                                                                                            |
| Matthew                           | Mac Partlin |                       |                  | Wollongong ICU, Wollongong ICU                                          | Wollongong, New South Wales, Australia     | Local Investigator                                      |                                                                                            |
| David                             | Bowen       |                       |                  | Wyong Hospital                                                          | Hamlyn Terrace, New South Wales, Australia | Local Investigator                                      |                                                                                            |

## Supplemental Online Content: Nonauthor Collaborators

\*First name, last name, and suffix (if applicable) are required and will appear in PubMed.

| *First Name and Middle Initial(s) | *Last Name | *Suffix (eg, Jr, III) | Academic Degrees | Institution                                                                                                                                                  | Location (city, state/province, country)         | Role or Contribution, eg, chair, principal investigator | Group (if more than 1 Group listed in the byline) and/or Subgroup (eg, Steering Committee) |
|-----------------------------------|------------|-----------------------|------------------|--------------------------------------------------------------------------------------------------------------------------------------------------------------|--------------------------------------------------|---------------------------------------------------------|--------------------------------------------------------------------------------------------|
| Md Motiul                         | Islam      |                       |                  | Ibn Sina Medical College Hospital, Bangabandhu Sheikh Mujib Medical University                                                                               | Shah Bag, Dhaka, Bangladesh                      | Local Investigator                                      |                                                                                            |
| Injamam Ull                       | Haque      |                       |                  | Central Police Hospital, Bangabandhu Sheikh Mujib Medical University                                                                                         | Shah Bag, Dhaka, Bangladesh                      | Local Investigator                                      |                                                                                            |
| Alain                             | Roman      |                       |                  | CHU St Pierre, Université Libre de Bruxelles, Brussels, CHU-St Pierre.                                                                                       | Brussels, Belgium                                | Local Investigator                                      |                                                                                            |
| Lionel                            | Haentjens  |                       |                  | CHU Mons a Paré, CHU Ambroise Paré                                                                                                                           | Boulevard Kennedy, 2, 7000 Mons, Belgium         | Local Investigator                                      |                                                                                            |
| Višnja                            | Ikic       |                       |                  | kbc zagreb, UHC Osijek                                                                                                                                       | Krstova ulica 92, Osijek, Croatia                | Local Investigator                                      |                                                                                            |
| Slavica                           | Kvolik     |                       |                  | UHC Osijek, UHC Osijek                                                                                                                                       | Krstova ulica 92, Osijek, Croatia                | Local Investigator                                      |                                                                                            |
| Robert                            | Bojčić     |                       |                  | UHC Zagreb, UHC Zagreb                                                                                                                                       | Kišpatičeva 12, Zagreb, Croatia                  | Local Investigator                                      |                                                                                            |
| Kazimir                           | Juričić    |                       |                  | UH Rijeka, KBC Rijeka                                                                                                                                        | Krešimirova ulica 92, Rijeka, Croatia            | Local Investigator                                      |                                                                                            |
| Martin                            | Duksa      |                       |                  | University Hospital Ostrava, Dpt. of Anesthesiology and Intensive Care Medicine, University Hospital Ostrava                                                 | Ostrava-Poruba, Czech Republic                   | Local Investigator                                      |                                                                                            |
| Lukáš                             | Bílek      |                       |                  | Institute for Clinical and Experimental Medicine Prague, Dpt. Of Anesthesiology and Intensive Care Medicine, Institute of clinical and experimental medicine | Videnska 1958, Praha 4, Czech Republic           | Local Investigator                                      |                                                                                            |
| Igor                              | Satinsky   |                       |                  | Hospital Havírov, Multidisciplinary intensive care unit, Hospital Havirov                                                                                    | Delnicka 1132/24; 736 01 Havirov, Czech Republic | Local Investigator                                      |                                                                                            |

## Supplemental Online Content: Nonauthor Collaborators

\*First name, last name, and suffix (if applicable) are required and will appear in PubMed.

| *First Name and Middle Initial(s) | *Last Name     | *Suffix (eg, Jr, III) | Academic Degrees | Institution                                                                                                                                                                                                                  | Location (city, state/province, country)                           | Role or Contribution, eg, chair, principal investigator | Group (if more than 1 Group listed in the byline) and/or Subgroup (eg, Steering Committee) |
|-----------------------------------|----------------|-----------------------|------------------|------------------------------------------------------------------------------------------------------------------------------------------------------------------------------------------------------------------------------|--------------------------------------------------------------------|---------------------------------------------------------|--------------------------------------------------------------------------------------------|
| Jan                               | Zatloukal      |                       |                  | FN Plzen, Dpt. Of Anesthesiology and Intensive Care Medicine, University Hospital Plzen                                                                                                                                      | alej Svobody 80, 304 60 Plzen, Czech Republic                      | Local Investigator                                      |                                                                                            |
| Lene                              | Russell        |                       |                  | Rigshospitalet, Department of Intensive Care                                                                                                                                                                                 | Blegdamsvej 9, 2100 Copenhagen, Denmark                            | National Coordinator                                    |                                                                                            |
| Morten H.                         | Bestle         |                       |                  | Nordsjællands hospital, Department of Anaesthesiology and Intensive Care, Copenhagen University Hospital - North Zealand, Hilleroed, Denmark; Department of Clinical Medicine, University of Copenhagen, Copenhagen, Denmark | Nordsjællands hospital, Dyrehavevej 29, 3400 Hillerød, Denmark     | Local Investigator                                      |                                                                                            |
| Christian S.                      | Meyhoff        |                       |                  | Bispebjerg hospital, Department of Anaesthesia and Intensive Care, Copenhagen University Hospital - Bispebjerg and Frederiksberg, Copenhagen, Denmark                                                                        | Bispebjerg hospital, Bispebjerg Bakke 23, 2400 Copenhagen, Denmark | Local Investigator                                      |                                                                                            |
| Ana Maria                         | Diaz-Medina    |                       |                  | Hospital Eugenio Espejo, Unidad de Cuidados Intensivos, Hospital Eugenio Espejo                                                                                                                                              | Quito, Ecuador                                                     | Local Investigator                                      |                                                                                            |
| Verónica                          | Llumiquinga    |                       |                  | Hospital Santa Ines, Unidad de Cuidados Intensivos, Hospital Santa Inés                                                                                                                                                      | Cuenca, Ecuador                                                    | Local Investigator                                      |                                                                                            |
| Hernán                            | Aguirre-Bermeo |                       |                  | Hospital Vicente Corral Moscoso, Unidad de Cuidados Intensivos, Hospital Vicente Corral Moscoso                                                                                                                              | Cuenca, Ecuador                                                    | National Coordinator                                    |                                                                                            |

## Supplemental Online Content: Nonauthor Collaborators

\*First name, last name, and suffix (if applicable) are required and will appear in PubMed.

| *First Name and Middle Initial(s) | *Last Name      | *Suffix (eg, Jr, III) | Academic Degrees | Institution                                                                                                                                  | Location (city, state/province, country) | Role or Contribution, eg, chair, principal investigator | Group (if more than 1 Group listed in the byline) and/or Subgroup (eg, Steering Committee) |
|-----------------------------------|-----------------|-----------------------|------------------|----------------------------------------------------------------------------------------------------------------------------------------------|------------------------------------------|---------------------------------------------------------|--------------------------------------------------------------------------------------------|
| Heinert Enmanuel                  | Gonzabay-Campos |                       |                  | Hospital General Monte Sinai, Unidad de Cuidados Intensivos, Hospital General Monte Siani, Guayaquil.                                        | Guayaquil, Ecuador                       | Local Investigator                                      |                                                                                            |
| Mohamed                           | Elbahnasawy     |                       |                  | Tanta University, Emergency medicine and traumatology department, Tanta University faculty of medicine                                       | Tanta, Egypt                             | Local Investigator                                      |                                                                                            |
| Xavier                            | Chapalain       |                       |                  | Brest surgical unit, Département d'anesthésie réanimation CHU de Brest, Université de Bretagne occidentale                                   | Brest, France                            | Local Investigator                                      |                                                                                            |
| Charlène                          | Le Moal         |                       |                  | Hospital of Le Mans, Réanimation, Centre Hospitalier Le Mans                                                                                 | Le mans, France                          | Local Investigator                                      |                                                                                            |
| Pierre-Yves                       | Egreteau        |                       |                  | Hospital of Morlaix, Service de Réanimation polyvalente, Centre Hospitalier des Pays de Morlaix                                              | Morlaix, France                          | Local Investigator                                      |                                                                                            |
| Yoann                             | Launey          |                       |                  | Rennes Surgical ICU, Service d'Anesthésie-Réanimation 1, Département d'Anesthésie-Réanimation et Médecine Péri-Opératoire, CHU de Rennes     | Rennes, France                           | Local Investigator                                      |                                                                                            |
| Florian                           | Reizine         |                       |                  | Rennes Medical ICU, services des maladies infectieuses et réanimation médicale, CHU de Rennes                                                | Rennes, France                           | Local Investigator                                      |                                                                                            |
| Florence                          | Boissier        |                       |                  | Teaching Hospital of Poitiers, University hospital of Poitiers, Medical Intensive Care and INSERM CIC 1402 (ALIVE group) Poitiers University | Poitiers, France                         | Local Investigator                                      |                                                                                            |

## Supplemental Online Content: Nonauthor Collaborators

\*First name, last name, and suffix (if applicable) are required and will appear in PubMed.

| *First Name and Middle Initial(s) | *Last Name | *Suffix (eg, Jr, III) | Academic Degrees | Institution                                                                                                                                                                                                      | Location (city, state/province, country) | Role or Contribution, eg, chair, principal investigator | Group (if more than 1 Group listed in the byline) and/or Subgroup (eg, Steering Committee) |
|-----------------------------------|------------|-----------------------|------------------|------------------------------------------------------------------------------------------------------------------------------------------------------------------------------------------------------------------|------------------------------------------|---------------------------------------------------------|--------------------------------------------------------------------------------------------|
| Reignier                          | Jean       |                       |                  | Teaching Hospital of Nantes, Service de Médecine Intensive Réanimation, Centre Hospitalier Universitaire de Nantes, Nantes, France; Université de Nantes                                                         | Nantes, France                           | Local Investigator                                      |                                                                                            |
| Stephan                           | Ehrmann    |                       |                  | Teaching Hospital of Tours, Médecine Intensive Réanimation, CIC 1415 INSERM, CRICS-TriggerSep F-CRIN research network and Centre d'étude des pathologies respiratoires (CEPR), INSERM U1100, Université de Tours | Tours, France                            | Local Investigator                                      |                                                                                            |
| Eddy                              | Lebas      |                       |                  | Hospital of Vannes, Réanimation Polyvalente, Centre Hospitalier Bretagne Atlantique                                                                                                                              | Vannes, France                           | Local Investigator                                      |                                                                                            |
| Gaëlle                            | Corno      |                       |                  | Hospital of Toulon, Réanimation polyvalente, Centre Hospitalier Intercommunal de Toulon                                                                                                                          | Toulon, France                           | Local Investigator                                      |                                                                                            |
| Pauline                           | Cailliez   |                       |                  | Hospital of Lorient, Service de réanimation polyvalente, Centre Hospitalier de Bretagne Sud, CHBS                                                                                                                | Lorient, France                          | Local Investigator                                      |                                                                                            |
| Pierre                            | Garçon     |                       |                  | Hospital of Jossigny, Service de Réanimation Polyvalente, Grand Hôpital de l'Est Francilien site de Marne-la-Vallée, Jossigny                                                                                    | Jossigny, France                         | Local Investigator                                      |                                                                                            |

## Supplemental Online Content: Nonauthor Collaborators

\*First name, last name, and suffix (if applicable) are required and will appear in PubMed.

| *First Name and Middle Initial(s) | *Last Name | *Suffix (eg, Jr, III) | Academic Degrees | Institution                                                                                                                                                                                                                                                                                                                                                     | Location (city, state/province, country) | Role or Contribution, eg, chair, principal investigator | Group (if more than 1 Group listed in the byline) and/or Subgroup (eg, Steering Committee) |
|-----------------------------------|------------|-----------------------|------------------|-----------------------------------------------------------------------------------------------------------------------------------------------------------------------------------------------------------------------------------------------------------------------------------------------------------------------------------------------------------------|------------------------------------------|---------------------------------------------------------|--------------------------------------------------------------------------------------------|
| Guillaume                         | Carteaux   |                       |                  | Henri Mondor Teaching Hospital Paris, Assistance Publique-Hôpitaux de Paris, CHU Henri Mondor, Service de Médecine Intensive Réanimation, Créteil, F-94010 France; Université Paris Est-Créteil, Faculté de Santé, Groupe de Recherche Clinique CARMAS, Créteil, F-94010 France; INSERM U955, Institut Mondor de Recherche Biomédicale, Créteil, F-94010 France | Créteil, France                          | Local Investigator                                      |                                                                                            |
| Antoine                           | Kimmoun    |                       |                  | Hospital of Nancy, Université de Lorraine, CHRU de Nancy, institut Lorrain du cœur et des vaisseaux, service de médecine intensive et réanimation Brabois, INSERM U1116, Nancy, France                                                                                                                                                                          | Nancy, France                            | Local Investigator                                      |                                                                                            |
| Danai                             | Theodoulou |                       |                  | Thoracic Diseases General Hospital Sotiria, Sotiria General Hospital, ICU                                                                                                                                                                                                                                                                                       | Athens, Greece                           | Local Investigator                                      |                                                                                            |
| STAVROS                           | ALOIZOS    |                       |                  | General Military Hospital NIMTS, Department of Intensive Care                                                                                                                                                                                                                                                                                                   | Athens, Greece                           | Local Investigator                                      |                                                                                            |
| Eleftherios                       | Papadakis  |                       |                  | University Hospital Heraklion, Department of Intensive Care, University Hospital Heraklion                                                                                                                                                                                                                                                                      | Iraklio, Greece                          | Local Investigator                                      |                                                                                            |
| KONSTANTINOS                      | TSAKALIS   |                       |                  | General Hospital Laiko, Department of Critical Care Medicine, Laiko, General Hospital of Athens, Athens                                                                                                                                                                                                                                                         | Athens, Greece                           | Local Investigator                                      |                                                                                            |



## Supplemental Online Content: Nonauthor Collaborators

\*First name, last name, and suffix (if applicable) are required and will appear in PubMed.

| *First Name and Middle Initial(s) | *Last Name     | *Suffix (eg, Jr, III) | Academic Degrees | Institution                                                                                                            | Location (city, state/province, country) | Role or Contribution, eg, chair, principal investigator | Group (if more than 1 Group listed in the byline) and/or Subgroup (eg, Steering Committee) |
|-----------------------------------|----------------|-----------------------|------------------|------------------------------------------------------------------------------------------------------------------------|------------------------------------------|---------------------------------------------------------|--------------------------------------------------------------------------------------------|
| Giorgos                           | Marinakis      |                       |                  | General Hospital Korgialenio-Mpenakio HRC, Department of Intensive Care                                                | Athens, Greece                           | Local Investigator                                      |                                                                                            |
| Ioannis                           | Georgakas      |                       |                  | General Hospital Imathia, Department of Intensive Care                                                                 | Naousa, Greece                           | Local Investigator                                      |                                                                                            |
| Paraskevi                         | Tripolitsioti  |                       |                  | General Oncologic Hospital of Kifisia Agioi Anargiri, Department of Intensive Care                                     | Kifisia, Greece                          | Local Investigator                                      |                                                                                            |
| Sofia                             | Nikolakopoulou |                       |                  | General Hospital Asklepieio Voulas, Department of Intensive Care                                                       | Voula, Greece                            | Local Investigator                                      |                                                                                            |
| Georgios                          | Papathanakos   |                       |                  | University Hospital Ioannina, Department of Intensive Care                                                             | Ioannina, Greece                         | Local Investigator                                      |                                                                                            |
| Chrysanthi                        | Sklavou        |                       |                  | Agios Savvas, Department of Intensive Care                                                                             | Athens, Greece                           | Local Investigator                                      |                                                                                            |
| Evangelia                         | Tsika          |                       |                  | General Hospital Ippokratio, Department of Intensive Care                                                              | Athens, Greece                           | Local Investigator                                      |                                                                                            |
| Ourania                           | Mousafiri      |                       |                  | General Hospital Chatzikostas, General Hospital of Ioannina Hatzikosta                                                 | Ioannina, Greece                         | Local Investigator                                      |                                                                                            |
| Athanasios                        | Prekates       |                       |                  | General Hospital Tzanio, Tzaneio General Hospital of Piraeus                                                           | Piraeus, Greece                          | Local Investigator                                      |                                                                                            |
| Georgia                           | Micha          |                       |                  | University Hospital Aretaieio, Aretaieio University Hospital of Athens, National and Kapodistrian University of Athens | Athens, Greece                           | Local Investigator                                      |                                                                                            |
| Athina                            | Lavrentieva    |                       |                  | General Hospital Papanikolaou                                                                                          | Pilea Chortiatis, Greece                 | Local Investigator                                      |                                                                                            |
| Theodoros                         | Aslanidis      |                       |                  | General Hospital Agios Pavlos, Intensive Care Unit                                                                     | Kalamaria, Greece                        | Local Investigator                                      |                                                                                            |
| Athina                            | Palaiologou    |                       |                  | General Panarkadic Hospital, Department of Intensive Care                                                              | Tripoli, Greece                          | Local Investigator                                      |                                                                                            |

## Supplemental Online Content: Nonauthor Collaborators

\*First name, last name, and suffix (if applicable) are required and will appear in PubMed.

| *First Name and Middle Initial(s) | *Last Name    | *Suffix (eg, Jr, III) | Academic Degrees | Institution                                                                                                                           | Location (city, state/province, country)                                           | Role or Contribution, eg, chair, principal investigator | Group (if more than 1 Group listed in the byline) and/or Subgroup (eg, Steering Committee) |
|-----------------------------------|---------------|-----------------------|------------------|---------------------------------------------------------------------------------------------------------------------------------------|------------------------------------------------------------------------------------|---------------------------------------------------------|--------------------------------------------------------------------------------------------|
| Clementine                        | Bostantzoglou |                       |                  | Sotiria Hospital: ICU 1, Department of Intensive Care                                                                                 | Athens, Greece                                                                     | Local Investigator                                      |                                                                                            |
| Evangelia                         | Dikoudi       |                       |                  | Sotiria Hospital: ICU 3, Department of Intensive Care                                                                                 | Athens, Greece                                                                     | Local Investigator                                      |                                                                                            |
| Silia                             | Karaouli      |                       |                  | Sotiria Hospital: ICU 4, Department of Intensive Care                                                                                 | Athens, Greece                                                                     | Local Investigator                                      |                                                                                            |
| Sophia                            | Pouriki       |                       |                  | KAA Sotiria, Department of Intensive Care                                                                                             | Athens, Greece                                                                     | Local Investigator                                      |                                                                                            |
| Swapna                            | Vijayakumaran |                       |                  | Tata Memorial Hospital, Department of Anaesthesiology, Critical Care and Pain, Tata Memorial Hospital, Homi Bhabha National Institute | Tata Memorial Hospital, Mumbai, India                                              | Local Investigator                                      |                                                                                            |
| Darshana                          | Rathod        |                       |                  | Sir H N Reliance Foundation Hospital, Department of Critical Care Medicine, Sir H N Reliance Foundation Hospital                      | Sir H N Reliance Foundation Hospital, Mumbai, India                                | Local Investigator                                      |                                                                                            |
| VENKAT RAMAN                      | KOLA          |                       |                  | Yashoda Hospital, Department of Critical Care Medicine, Yashoda Hospitals, Secunderabad                                               | Telangana, India                                                                   | Local Investigator                                      |                                                                                            |
| Deepak                            | Jeswani       |                       |                  | Criticare Hospital and Research Institute, Criticare Hospital and Research Institute.                                                 | Sitabuldi, Nagpur, India                                                           | Local Investigator                                      |                                                                                            |
| Kadarapura Nanjundaiah            | Gopalakrishna |                       |                  | NIMHANS, Department of Neuroanaesthesia and Neurocritical Care                                                                        | National Institute of Mental Health and Neuro Sciences (NIMHANS), Bengaluru, India | Local Investigator                                      |                                                                                            |

Supplemental Online Content: Nonauthor Collaborators

\*First name, last name, and suffix (if applicable) are required and will appear in PubMed.

| *First Name and Middle Initial(s) | *Last Name  | *Suffix (eg, Jr, III) | Academic Degrees | Institution                                                                                                                                             | Location (city, state/province, country)                                                                      | Role or Contribution, eg, chair, principal investigator | Group (if more than 1 Group listed in the byline) and/or Subgroup (eg, Steering Committee) |
|-----------------------------------|-------------|-----------------------|------------------|---------------------------------------------------------------------------------------------------------------------------------------------------------|---------------------------------------------------------------------------------------------------------------|---------------------------------------------------------|--------------------------------------------------------------------------------------------|
| Amol                              | Hartalkar   |                       |                  | BKL WRMC, Professor, Department of Medicine, BKL Walawalkar Rural Medical College & Hospital, Dervan, Chiplun (Maharashtra) India, Dervan, Chiplun      | Department of Medicine, BKL Walawalkar Rural Medical College & Hospital, Dervan, Chiplun (Maharashtra), India | Local Investigator                                      |                                                                                            |
| Ata                               | Mahmoodpoor |                       |                  | Imam Reza hospital/shohada hospital, Department of Anesthesiology, Faculty of Medicine, Tabriz University of Medical Sciences                           | Arbedil, Iran                                                                                                 | Local Investigator                                      |                                                                                            |
| Marwah                            | Abdulkhaleq |                       |                  | Ghazi Al-Hariri Surgical Specialties Hospital, Department of intensive care, medical city hospital                                                      | Bagdad, Iraq                                                                                                  | Local Investigator                                      |                                                                                            |
| Mariachiara                       | Ippolito    |                       |                  | Policlinicio Paolo Giaccone, University of Palermo, Department of Surgical, Oncological and Oral Science (Di.Chir.On.S.), University of Palermo, Italy. | Palermo, Italy                                                                                                | Local Investigator                                      |                                                                                            |
| Antonella                         | Cotoia      |                       |                  | University Hospital of Foggia, Intensive Care Medicine                                                                                                  | Foggia, Italy                                                                                                 | Local Investigator                                      |                                                                                            |
| Marco                             | Covotta     |                       |                  | Regina Elena National Cancer Institute, IRCCS Regina Elena National Cancer Institute                                                                    | Rome, Italy                                                                                                   | Local Investigator                                      |                                                                                            |

## Supplemental Online Content: Nonauthor Collaborators

\*First name, last name, and suffix (if applicable) are required and will appear in PubMed.

| *First Name and Middle Initial(s) | *Last Name | *Suffix (eg, Jr, III) | Academic Degrees | Institution                                                                                                                                                   | Location (city, state/province, country) | Role or Contribution, eg, chair, principal investigator | Group (if more than 1 Group listed in the byline) and/or Subgroup (eg, Steering Committee) |
|-----------------------------------|------------|-----------------------|------------------|---------------------------------------------------------------------------------------------------------------------------------------------------------------|------------------------------------------|---------------------------------------------------------|--------------------------------------------------------------------------------------------|
| Filippo                           | Sanfilippo |                       |                  | Azienda Ospedaliera Universitaria, Department of Anesthesiology and Intensive Care, Azienda Ospedaliero Universitaria 'Policlinico-San Marco', Catania, Italy | Catania, Italy                           | Local Investigator                                      |                                                                                            |
| Ehab                              | Ishteiwy   |                       |                  | Althawra hospital, medical ICU, Althawra hospital, Medical Intensive Care Unit                                                                                | Al Bayda' City, Libiya                   | Local Investigator                                      |                                                                                            |
| Hebtallah                         | Benzarti   |                       |                  | Tripoli Central hospital, medical ICU, Medical ICU, Tripoli Central hospital                                                                                  | Elsaidi Street, Tripoli, Libiya          | Local Investigator                                      |                                                                                            |
| Ahmed Elmabri Mohammed            | Bouhuwaish |                       |                  | Tobruk medical centre, medical ICU, Medical ICU, Tobruk medical centre                                                                                        | Tobruk, Libiya                           | Local Investigator                                      |                                                                                            |
| Alya                              | Abdalhadi  |                       |                  | Sabha Medical Center, Sebha Medical Center                                                                                                                    | Sebha, Libiya                            | Local Investigator                                      |                                                                                            |
| Ahmad                             | Buimsaedah |                       |                  | Aljalla Benghazi Hospital, surgical ICU, Surgical ICU, Aljalla Benghazi Hospital                                                                              | Benghazi, Libiya                         | Local Investigator                                      |                                                                                            |
| Eman Ali                          | Abdulwahed |                       |                  | Tripoli Central Hospital, trauma ICU, Trauma ICU, Tripoli Central Hospital                                                                                    | Elsaidi Street, Tripoli, Libiya          | Local Investigator                                      |                                                                                            |
| Khalil                            | Tamoos     |                       |                  | Aljalla Benghazi Hospital, medical ICU, Medical ICU, Aljalla Benghazi Hospital                                                                                | Benghazi, Libiya                         | Local Investigator                                      |                                                                                            |
| Eman                              | Younes     |                       |                  | Al-Zawia Teaching Hospital, Al-Zawia Teaching Hospital                                                                                                        | Al-Zawia, Libiya                         | Local Investigator                                      |                                                                                            |
| Asma Abubakr Saleh                | Alkamkhe   |                       |                  | Sabratha Teaching Hospital, medical ICU, Medical ICU, Sabratha Teaching Hospital                                                                              | Sabratha, Libiya                         | Local Investigator                                      |                                                                                            |

## Supplemental Online Content: Nonauthor Collaborators

\*First name, last name, and suffix (if applicable) are required and will appear in PubMed.

| *First Name and Middle Initial(s) | *Last Name  | *Suffix (eg, Jr, III) | Academic Degrees | Institution                                                                                | Location (city, state/province, country) | Role or Contribution, eg, chair, principal investigator | Group (if more than 1 Group listed in the byline) and/or Subgroup (eg, Steering Committee) |
|-----------------------------------|-------------|-----------------------|------------------|--------------------------------------------------------------------------------------------|------------------------------------------|---------------------------------------------------------|--------------------------------------------------------------------------------------------|
| Marwa                             | Biala       |                       |                  | Tripoli Central Hospital, surgical ICU, Surgical ICU, Tripoli Central Hospital             | Elsaidi Street, Tripoli, Libiya          | Local Investigator                                      |                                                                                            |
| Hajer Abdalla Mohammed            | Hwili       |                       |                  | Medical Misurata Center, Medical Misurata Center                                           | Misurata, Libiya                         | Local Investigator                                      |                                                                                            |
| Najat Shaban                      | Ben Hasan   |                       |                  | Zliten medical center, medical ICU, Zliten Medical Centre                                  | Sea Street, Zliten, Libiya               | Local Investigator                                      |                                                                                            |
| Bushray Alhadi                    | Almiqlash   |                       |                  | Shaima Clinic - Janzour, medical ICU, Medical ICU, Shaima Clinic                           | Janzour, Tripoli, Libiya                 | Local Investigator                                      |                                                                                            |
| Mawadda                           | Altair      |                       |                  | AboSleem Hospital; trauma, Trauma ICU, AboSleem Hospital                                   | AboSleem, Tripoli, Libiya                | Local Investigator                                      |                                                                                            |
| Rema                              | Otman       |                       |                  | Alkhadra Hospital Tripoli; medical, Intensive Care Unit, Alkhadra Hospital Tripoli         | AboSleem, Tripoli, Libiya                | Local Investigator                                      |                                                                                            |
| Mohamed Fathi                     | Al Gharyani |                       |                  | Benghazi Medical Center; surgical/trauma, Surgical and Trauma ICU, Benghazi Medical Center | Benghazi, Libiya                         | Local Investigator                                      |                                                                                            |
| Omlez Mohammed                    | Alkeelani   |                       |                  | El Maqarif Hospital Agdabia, El Maqarif Hospital                                           | Agdabia, Libiya                          | Local Investigator                                      |                                                                                            |
| Hibah                             | Bakeer      |                       |                  | Gheryan Central Hospital, Gheryan Central Hospital                                         | Gheryan, Libiya                          | Local Investigator                                      |                                                                                            |
| Azah Mukhtar                      | Omar Affat  |                       |                  | Misurata Medical Center; medical, Medical ICU, Misurata Medical Center                     | Misurata, Libiya                         | Local Investigator                                      |                                                                                            |
| Husayn                            | Aween       |                       |                  | Misurata Medical Center; surgical, Surgical ICU, Misurata Medical Center                   | Misurata, Libiya                         | Local Investigator                                      |                                                                                            |

## Supplemental Online Content: Nonauthor Collaborators

\*First name, last name, and suffix (if applicable) are required and will appear in PubMed.

| *First Name and Middle Initial(s) | *Last Name | *Suffix (eg, Jr, III) | Academic Degrees | Institution                                                                                                                                                    | Location (city, state/province, country)    | Role or Contribution, eg, chair, principal investigator | Group (if more than 1 Group listed in the byline) and/or Subgroup (eg, Steering Committee) |
|-----------------------------------|------------|-----------------------|------------------|----------------------------------------------------------------------------------------------------------------------------------------------------------------|---------------------------------------------|---------------------------------------------------------|--------------------------------------------------------------------------------------------|
| Aihab                             | Benamwor   |                       |                  | National Cancer Institution<br>Misurata, Intensive Care Unit,<br>National Cancer Institute Misurata                                                            | Misurata, Libiya                            | Local Investigator                                      |                                                                                            |
| Mohamed                           | Alson      |                       |                  | Tripoli Medical Center; cardiac,<br>Cardiac ICU, Tripoli Medical Center<br>(Tripoli University Hospital)                                                       | Furnaj, University Road,<br>Tripoli, Libiya | Local Investigator                                      |                                                                                            |
| Najwa                             | Abdelrahim |                       |                  | Ibn sina hospital, Medical ICU, Ibn<br>Sina Hospital                                                                                                           | Sirt, Libiya                                | Local Investigator                                      |                                                                                            |
| GHANNAM                           | Abdelilah  |                       |                  | faculty of medicine and pharmacy of<br>Rabat, Mohammed V university,<br>Université Mohammed V de Rabat,<br>Centre Hospitalo-Universitaire Ibn<br>Sina de Rabat | Rabat, Maroc                                | Local Investigator                                      |                                                                                            |
| Rachael                           | Parke      |                       |                  | Auckland City Hospital CVICU,<br>Cardiothoracic and Vascular ICU,<br>Auckland City Hospital                                                                    | Auckland, New Zealand                       | Local Investigator                                      |                                                                                            |
| Yan                               | Chen       |                       |                  | Auckland district Health board<br>DCCM, Department of Critical Care<br>Medicine, Auckland City Hospital                                                        | Auckland, New Zealand                       | Local Investigator                                      |                                                                                            |
| Jan                               | Mehrtens   |                       |                  | Christchurch Hospital, Canterbury<br>District Health Board                                                                                                     | Christchurch, New<br>Zealand                | Local Investigator                                      |                                                                                            |
| Pawel                             | Twardowski |                       |                  | Dunedin Hospital, Department of<br>Surgical Sciences, Otago Medical<br>School                                                                                  | Dunedin New Zealand                         | Local Investigator                                      |                                                                                            |
| Ross                              | Freebairn  |                       |                  | Hawke's Bay Hospital                                                                                                                                           | Hastings, New Zealand                       | Local Investigator                                      |                                                                                            |
| Rima                              | Song       |                       |                  | Middlemore Hospital                                                                                                                                            | Auckland, New Zealand                       | Local Investigator                                      |                                                                                            |
| Charles                           | Gibson     |                       |                  | North shore hospital                                                                                                                                           | Auckland, New Zealand                       | Local Investigator                                      |                                                                                            |

## Supplemental Online Content: Nonauthor Collaborators

\*First name, last name, and suffix (if applicable) are required and will appear in PubMed.

| *First Name and Middle Initial(s) | *Last Name | *Suffix (eg, Jr, III) | Academic Degrees | Institution                                                                                                                                   | Location (city, state/province, country) | Role or Contribution, eg, chair, principal investigator | Group (if more than 1 Group listed in the byline) and/or Subgroup (eg, Steering Committee) |
|-----------------------------------|------------|-----------------------|------------------|-----------------------------------------------------------------------------------------------------------------------------------------------|------------------------------------------|---------------------------------------------------------|--------------------------------------------------------------------------------------------|
| Jonathan                          | Chen       |                       |                  | Tauranga Hospital, Te Whatu Ora Health New Zealand, Hauora a Toi Bay of Plenty                                                                | Tauranga, New Zealand                    | Local Investigator                                      |                                                                                            |
| Richard                           | Moore      |                       |                  | Waikato Hospital, Waikato Hospital Intensive Care                                                                                             | Hamilton, New Zealand                    | Local Investigator                                      |                                                                                            |
| Mary Rose                         | Sol Cruz   |                       |                  | Wellington Hospital, CCDHB INTENSIVE CARE UNIT                                                                                                | Wellington, New Zealand                  | Local Investigator                                      |                                                                                            |
| Anna                              | Wludarczyk |                       |                  | Wojskowy Szpital Kliniczny z Poliklinika w Krakowie, Department of Intensive Care and Perioperative Medicine, Jagiellonian University Medical | Krakow, Poland                           | Local Investigator                                      |                                                                                            |
| Łukasz                            | Krzych     |                       |                  | Central University Hospital, Department of Anesthesiology and Intensive Care, Medical University of Silesia, Katowice, Poland                 | Katowice, Poland                         | Local Investigator                                      |                                                                                            |
| Marta                             | Szczukocka |                       |                  | Medical University of Lublin, 2nd Department of Anesthesiology and Intensive Care, Medical University of Lublin, Lublin, Poland               | Publin, Poland                           | Local Investigator                                      |                                                                                            |
| Marcin                            | Kubiak     |                       |                  | Szpital Wojewodzki w Opolu, Oddzial Anestezjologii i Intensywnej Terapii, Szpital Wojewodzki w Opolu                                          | Opole, Poland                            | Local Investigator                                      |                                                                                            |
| Maciej                            | Molsa      |                       |                  | Uniwersytecki Szpital Kliniczny w Opolu, Department of Anesthesiology and Intensive Care, Institute of Medical Sciences, University of Opole  | Opole, Poland                            | Local Investigator                                      |                                                                                            |

## Supplemental Online Content: Nonauthor Collaborators

\*First name, last name, and suffix (if applicable) are required and will appear in PubMed.

| *First Name and Middle Initial(s) | *Last Name       | *Suffix (eg, Jr, III) | Academic Degrees | Institution                                                                                                                                                                       | Location (city, state/province, country) | Role or Contribution, eg, chair, principal investigator | Group (if more than 1 Group listed in the byline) and/or Subgroup (eg, Steering Committee) |
|-----------------------------------|------------------|-----------------------|------------------|-----------------------------------------------------------------------------------------------------------------------------------------------------------------------------------|------------------------------------------|---------------------------------------------------------|--------------------------------------------------------------------------------------------|
| Magdalena                         | Wujtewicz        |                       |                  | University Clinical Centre, Medical University of Gdansk, Department of Anaesthesiology and Intensive Therapy , Faculty of Medicine, Medical University of Gdansk, Gdansk, Poland | Gdansk, Poland                           | Local Investigator                                      |                                                                                            |
| Agnieszka                         | Wieczorek        |                       |                  | Wojskowy Szpital Kliniczny z Poliklinika, Kliniczny Oddzial Anestezjologii i Intensywnej Terapii, 4 Wojskowy Szpital Kliniczny z Poliklinika SP ZOZ                               | Wroclaw, Poland                          | Local Investigator                                      |                                                                                            |
| Agnieszka                         | Misiewska-Kaczur |                       |                  | Szpital Slaski w Cieszynie, Oddzial Anestezjologii i Intensywnej Terapii, Szpital Slaski w Cieszynie                                                                              | Cieszyn, Poland                          | Local Investigator                                      |                                                                                            |
| Marek                             | Maslicki         |                       |                  | Wielospecjalistyczny Szpital SPZOZ w Nowej Soli, Oddzial Anestezjologii i Intensywnej Terapii, Wielospecjalistyczny Szpital SP ZOZ w Nowej Soli                                   | Nowa Sol, Poland                         | Local Investigator                                      |                                                                                            |
| Dariusz                           | Onichimowski     |                       |                  | Wojewodzki Szpital Specjalistyczny w Olsztynie, University of Warmia and Mazury in Olsztyn Collegium Medicum Department of Anaesthesiology and Intensive Care                     | Olsztyn, Poland                          | Local Investigator                                      |                                                                                            |
| Jakub                             | Mazur            |                       |                  | Szpital Wojewodzki w Bielsku-Bialej, Oddzial Anestezjologii i Intensywnej Terapii, Szpital Wojewodzki w Bielsku-Bialej                                                            | Bielsko-Biala, Poland                    | Local Investigator                                      |                                                                                            |



## Supplemental Online Content: Nonauthor Collaborators

\*First name, last name, and suffix (if applicable) are required and will appear in PubMed.

| *First Name and Middle Initial(s) | *Last Name | *Suffix (eg, Jr, III) | Academic Degrees | Institution                                                                                                                                             | Location (city, state/province, country)                    | Role or Contribution, eg, chair, principal investigator | Group (if more than 1 Group listed in the byline) and/or Subgroup (eg, Steering Committee) |
|-----------------------------------|------------|-----------------------|------------------|---------------------------------------------------------------------------------------------------------------------------------------------------------|-------------------------------------------------------------|---------------------------------------------------------|--------------------------------------------------------------------------------------------|
| Pawel                             | Zatorski   |                       |                  | University Clinical Center of Medical University of Warsaw, I Department of Anaesthesiology and Intensive Care                                          | Warsaw, Poland                                              | Local Investigator                                      |                                                                                            |
| Ana Marta                         | Mota       |                       |                  | Hospital Central do Funchal, Madeira, Intensive Care Medicine Department, Hospital Central do Funchal                                                   | Av. Luís de Camões 6180, 9000-177 Funchal, Portugal         | Local Investigator                                      |                                                                                            |
| Joana                             | Fernandes  |                       |                  | Centro Hospitalar e Universitário de São João, Intensive Care Medicine Department, Centro Hospitalar e Universitário de São João                        | Alameda Prof. Hernâni Monteiro, 4200-319 Porto, Portugal    | Local Investigator                                      |                                                                                            |
| Diana                             | Castro     |                       |                  | Centro Hospitalar de Leiria, Intensive Care Medicine Department, Centro Hospitalar de Leiria - Hospital de Santo André                                  | R. de Santo André, 2410-197 Leiria, Portugal                | Local Investigator                                      |                                                                                            |
| Elisabete                         | Coelho     |                       |                  | Hospital de Braga, Intensive Care Medicine Department, Hospital de Braga                                                                                | R. das Comunidades Lusíadas 133, Braga, Portugal            | Local Investigator                                      |                                                                                            |
| Alexandra                         | Paula      |                       |                  | Unidade de Saude Local do Baixo Alentejo, Intensive Care Medicine Department, Unidade Local de Saúde do Baixo Alentejo, Hospital José Joaquim Fernandes | R. Dr. Antonio Fernando Covas Lima, 7801-849 Beja, Portugal | Local Investigator                                      |                                                                                            |
| Teresa                            | Guimarães  |                       |                  | Centro Hospitalar Tamega e Sousa, Intensive Care Medicine Department, Centro Hospitalar Tâmega e Sousa                                                  | Avenida do Hospital Padre Américo 210, 4564-007, Portugal   | Local Investigator                                      |                                                                                            |

## Supplemental Online Content: Nonauthor Collaborators

\*First name, last name, and suffix (if applicable) are required and will appear in PubMed.

| *First Name and Middle Initial(s) | *Last Name | *Suffix (eg, Jr, III) | Academic Degrees | Institution                                                                                                                            | Location (city, state/province, country)                     | Role or Contribution, eg, chair, principal investigator | Group (if more than 1 Group listed in the byline) and/or Subgroup (eg, Steering Committee) |
|-----------------------------------|------------|-----------------------|------------------|----------------------------------------------------------------------------------------------------------------------------------------|--------------------------------------------------------------|---------------------------------------------------------|--------------------------------------------------------------------------------------------|
| Diana                             | Adrião     |                       |                  | Centro Hospitalar de Vila Nova de Gaia/Espinho, Centro Hospitalar de Vila Nova de Gaia/Espinho".                                       | R. Conceição Fernandes, 4434-502 Vila Nova de Gaia, Portugal | Local Investigator                                      |                                                                                            |
| Igor                              | Mark       |                       |                  | University medical center Ljubljana: internal intensive care, Clinical department for internal intensive care, UMC Ljubljana           | Ljubljana, Slovenia                                          | Local Investigator                                      |                                                                                            |
| Elizabeta                         | Mušič      |                       |                  | University medical center Ljubljana: cardiothoracic ICU, Cardiothoracic ICU, UMC Ljubljana                                             | Ljubljana, Slovenia                                          | Local Investigator                                      |                                                                                            |
| Tomislav                          | Mirković   |                       |                  | University medical center Ljubljana: surgical intensive care, Department of Anaesthesiology and Surgical Intensive Care, UMC Ljubljana | Ljubljana, Slovenia                                          | Local Investigator                                      |                                                                                            |
| Andrej                            | Markota    |                       |                  | University medical center Maribor: internal intensive care, Medical Intensive Care Unit, UMC Maribor                                   | Maribor, Slovenia                                            | Local Investigator                                      |                                                                                            |
| Natalija                          | Krope      |                       |                  | University medical center Maribor: surgical intensive care, Surgical ICU, UMC Maribor                                                  | Maribor, Slovenia                                            | Local Investigator                                      |                                                                                            |
| Marko                             | Kmet       |                       |                  | General hospital Novo Mesto, Medical ICU, general Hospital Novo mesto                                                                  | Novo mesto, Slovenia                                         | Local Investigator                                      |                                                                                            |
| Petra                             | Forjan     |                       |                  | General hospital Murska Sobota, ICU, general Hospital, Murska Sobota                                                                   | Murska Sobota, Slovenia                                      | Local Investigator                                      |                                                                                            |
| Tomaž                             | Savli      |                       |                  | General hospital Jesenice, Surgical ICU, General Hospital Jesenice                                                                     | Jesenice, Slovenia                                           | Local Investigator                                      |                                                                                            |

## Supplemental Online Content: Nonauthor Collaborators

\*First name, last name, and suffix (if applicable) are required and will appear in PubMed.

| *First Name and Middle Initial(s) | *Last Name        | *Suffix (eg, Jr, III) | Academic Degrees | Institution                                                                         | Location (city, state/province, country)                                          | Role or Contribution, eg, chair, principal investigator | Group (if more than 1 Group listed in the byline) and/or Subgroup (eg, Steering Committee) |
|-----------------------------------|-------------------|-----------------------|------------------|-------------------------------------------------------------------------------------|-----------------------------------------------------------------------------------|---------------------------------------------------------|--------------------------------------------------------------------------------------------|
| Gerardo                           | Aguilar           |                       |                  | Hospital Clinic Universitari de València, Anaesthesiology and Critical Care Service | Av. de Blasco Ibáñez, 17, 46010 València, Valencia, Spain                         | Local Investigator                                      |                                                                                            |
| Rebeca                            | González-Celdrán  |                       |                  | H. General Universitario Reina Sofia Murcia, Department of Intensive Care           | Av. Intendente Jorge Palacios, 1, 30003 Murcia, Spain                             | Local Investigator                                      |                                                                                            |
| Estefanía                         | Martínez-González |                       |                  | Hospital Universitario Doctor Peset, Department of Intensive Care                   | Av. de Gaspar Aguilar, 90, 46017 València, Valencia, Spain                        | Local Investigator                                      |                                                                                            |
| Agustín                           | Díaz              |                       |                  | Hospital Universitario de Salamanca, Department of Intensive Care                   | P.º de San Vicente, 182, 37007 Salamanca, Spain                                   | Local Investigator                                      |                                                                                            |
| María José                        | Colomina          |                       |                  | Hospital de Bellvitge, Department of Intensive Care                                 | Carrer de la Feixa Llarga, s/n, 08907 L'Hospitalet de Llobregat, Barcelona, Spain | Local Investigator                                      |                                                                                            |
| Francisco                         | Hidalgo           |                       |                  | Clínica Universidad de Navarra, Department of Intensive Care                        | Av. de Pío XII, 36, 31008 Pamplona, Navarra, Spain                                | Local Investigator                                      |                                                                                            |
| Carlos                            | Ferrando          |                       |                  | Surgical IC Clinic Hospital Barcelona, Department of Intensive Care                 | C. de Villarroel, 170, 08036 Barcelona, Spain                                     | Local Investigator                                      |                                                                                            |
| Raquel                            | Ferrandis         |                       |                  | Hospital Universitari i Politecnic La Fe, Valencia, Department of Intensive Care    | Avinguda de Fernando Abril Martorell, 106, 46026 València, Valencia, Spain        | Local Investigator                                      |                                                                                            |
| Carolina                          | Ferrer            |                       |                  | Consortio Hospital General Universitario de Valencia, Department of Intensive Care  | Av. de les Tres Creus, 2, 46014 València, Valencia, Spain                         | Local Investigator                                      |                                                                                            |

## Supplemental Online Content: Nonauthor Collaborators

\*First name, last name, and suffix (if applicable) are required and will appear in PubMed.

| *First Name and Middle Initial(s) | *Last Name  | *Suffix (eg, Jr, III) | Academic Degrees | Institution                                                                                                      | Location (city, state/province, country)                             | Role or Contribution, eg, chair, principal investigator | Group (if more than 1 Group listed in the byline) and/or Subgroup (eg, Steering Committee) |
|-----------------------------------|-------------|-----------------------|------------------|------------------------------------------------------------------------------------------------------------------|----------------------------------------------------------------------|---------------------------------------------------------|--------------------------------------------------------------------------------------------|
| Virginia                          | Cegarra     |                       |                  | Hospital Sant Pau, Department of Intensive Care                                                                  | Carrer de Sant Antoni Maria Claret, 167, 08025 Barcelona, Spain      | Local Investigator                                      |                                                                                            |
| Aurelio                           | Gómez-Luque |                       |                  | Hospital Universitario Virgen de la Victoria, Department of Intensive Care                                       | Campus de Teatinos, S/N, 29010 Málaga, Spain                         | Local Investigator                                      |                                                                                            |
| Stina                             | Henman      |                       |                  | Sahlgrenska Universitetssjukhuset, Sahlgrenska University Hospital, Department of Anaesthesia and Intensive Care | Blå Stråket 5, 413 45 Göteborg, Sweden                               | Local Investigator                                      |                                                                                            |
| Disa                              | Blomstrand  |                       |                  | Sunderby sjukhus                                                                                                 | Södra Sunderbyn, Sweden                                              | Local Investigator                                      |                                                                                            |
| Emelie                            | Risberg     |                       |                  | Akademiska Sjukhuset Uppsala, Akademiska Sjukhuset, Department of Anaesthesia and Intensive Care                 | Uppsala, Sweden                                                      | Local Investigator                                      |                                                                                            |
| Natalie                           | Johansen    |                       |                  | Södersjukhuset, Södersjukhuset, Department of Anaesthesia and Intensive Care                                     | Södersjukhuset, Stockholm, Sweden                                    | Local Investigator                                      |                                                                                            |
| Henrik                            | Rajala      |                       |                  | Karolinska Sjukhuset Solna, Karolinska Universitetssjukhuset, Department of Anaesthesia and Intensive Care       | Stockholm, Sweden                                                    | Local Investigator                                      |                                                                                            |
| Natalie                           | Layous      |                       |                  | Karolinska Sjukhuset Huddinge, Karolinska Universitetssjukhuset, Department of Anaesthesia and Intensive Care    | Karolinska Universitetssjukhuset, Huddinge, 141 86 Stockholm, Sweden | Local Investigator                                      |                                                                                            |
| Eline A.                          | Vlot        |                       |                  | St Antonius Ziekenhuis, Department of Intensive Care                                                             | Koekoekslaan 1, 3435 CM Nieuwegein, the Netherlands                  | Local Investigator                                      |                                                                                            |

Supplemental Online Content: Nonauthor Collaborators

\*First name, last name, and suffix (if applicable) are required and will appear in PubMed.

| *First Name and Middle Initial(s) | *Last Name                 | *Suffix (eg, Jr, III) | Academic Degrees | Institution                                                                                                                                                                                                                       | Location (city, state/province, country)           | Role or Contribution, eg, chair, principal investigator | Group (if more than 1 Group listed in the byline) and/or Subgroup (eg, Steering Committee) |
|-----------------------------------|----------------------------|-----------------------|------------------|-----------------------------------------------------------------------------------------------------------------------------------------------------------------------------------------------------------------------------------|----------------------------------------------------|---------------------------------------------------------|--------------------------------------------------------------------------------------------|
| Michiel                           | Erkamp                     |                       |                  | Dijklander ziekenhuis, Department of Intensive Care, Dijklander Ziekenhuis                                                                                                                                                        | Maelsonstraat 3, 1624 NP Hoorn, the Netherlands    | Local Investigator                                      |                                                                                            |
| Nicole                            | Juffermans                 |                       |                  | OLVG, OLVG                                                                                                                                                                                                                        | Oosterpark 9 1091AC Amsterdam, the Netherlands     | Local Investigator                                      |                                                                                            |
| Stefan                            | van Wonderen               |                       |                  | Amsterdam UMC, AMC, Department of Intensive Care, Amsterdam UMC, location AMC, Amsterdam                                                                                                                                          | Meibergdreef 9, 1105AZ, Amsterdam, the Netherlands | Local Investigator                                      |                                                                                            |
| Lidija                            | Kuznecova-Keppel Hesselink |                       |                  | UMCG, Intensive care unit                                                                                                                                                                                                         | Hanzeplein 1, 9713 GZ Groningen, the Netherlands   | Local Investigator                                      |                                                                                            |
| Victor                            | van Bochove                |                       |                  | Franciscus gasthuis & Vlietland                                                                                                                                                                                                   | Kleiweg 500, 3045 PM, Rotterdam, the Netherlands   | Local Investigator                                      |                                                                                            |
| Murat                             | Acarel                     |                       |                  | University of Health Sciences Dr.Siyami Ersek Thoracic and Cardiovascular Surgery Center, Department of Anesthesiology and Reanimation, Dr.Siyami Ersek Thoracic and Cardiovascular Surgery Center, University of Health Sciences | Uskudar/Istanbul, Turkey                           | Local Investigator                                      |                                                                                            |
| Evren                             | Senturk                    |                       |                  | Koc University School of Medicine Department of Anesthesiology and Reanimation, Department of Anesthesiology and Reanimation, Koc University School of Medicine                                                                   | Zeytinburnu/Istanbul, Turkey                       | Local Investigator                                      |                                                                                            |

## Supplemental Online Content: Nonauthor Collaborators

\*First name, last name, and suffix (if applicable) are required and will appear in PubMed.

| *First Name and Middle Initial(s) | *Last Name     | *Suffix (eg, Jr, III) | Academic Degrees | Institution                                                                                                                                                                                     | Location (city, state/province, country) | Role or Contribution, eg, chair, principal investigator | Group (if more than 1 Group listed in the byline) and/or Subgroup (eg, Steering Committee) |
|-----------------------------------|----------------|-----------------------|------------------|-------------------------------------------------------------------------------------------------------------------------------------------------------------------------------------------------|------------------------------------------|---------------------------------------------------------|--------------------------------------------------------------------------------------------|
| Mahmut Alp                        | Karahan        |                       |                  | Harran University Medical Faculty<br>Department of Anesthesiology and Reanimation, Department of Anesthesiology and Reanimation, Harran University Medical Faculty                              | Sanliurfa/Turkiye, Turkey                | Local Investigator                                      |                                                                                            |
| Aynur                             | Camkiran Firat |                       |                  | Baskent University Faculty of Medicine, Anesthesiology Department, Department Anesthesiology, Baskent University Faculty of Medicine                                                            | Cankaya/Ankara, Turkey                   | Local Investigator                                      |                                                                                            |
| Yahya                             | Yildiz         |                       |                  | Medipol University Medical Faculty Hospital, Department Anesthesiology, Medipol University Medical Faculty Hospital                                                                             | Bagcilar/Istanbul, Turkey                | Local Investigator                                      |                                                                                            |
| Osman                             | Ekinci         |                       |                  | University of Health Sciences Haydarpasa Training and Research Hospital, Department of Anesthesiology and Reanimation, Haydarpasa Training and Research Hospital, University of Health Sciences | Istanbul, Turkey                         | Local Investigator                                      |                                                                                            |
| Asu                               | Ozgultekin     |                       |                  | University of Health Sciences Haydarpasa Training and Research Hospital, Department of Anesthesiology and Reanimation, Haydarpasa Training and Research Hospital, University of Health Sciences | Istanbul, Turkey                         | Local Investigator                                      |                                                                                            |

## Supplemental Online Content: Nonauthor Collaborators

\*First name, last name, and suffix (if applicable) are required and will appear in PubMed.

| *First Name and Middle Initial(s) | *Last Name | *Suffix (eg, Jr, III) | Academic Degrees | Institution                                                                                                                                                                                                | Location (city, state/province, country)                | Role or Contribution, eg, chair, principal investigator | Group (if more than 1 Group listed in the byline) and/or Subgroup (eg, Steering Committee) |
|-----------------------------------|------------|-----------------------|------------------|------------------------------------------------------------------------------------------------------------------------------------------------------------------------------------------------------------|---------------------------------------------------------|---------------------------------------------------------|--------------------------------------------------------------------------------------------|
| Huseyin                           | Arikan     |                       |                  | Van Yuzuncu Yil University Dursun Odabas Medical Center, Department of Intensive Care, Dursun Odabas Medical Center, Van Yuzuncu Yil University                                                            | Van, Turkey                                             | Local Investigator                                      |                                                                                            |
| Gamze                             | Kucukosman |                       |                  | Zonguldak Bülent Ecevit University Faculty of Medicine, Department of Anesthesiology and Reanimation, Department of Anesthesiology and Reanimation, Zonguldak Bülent Ecevit University Faculty of Medicine | Esenkoy, 67000 Zonguldak Merkez/Zonguldak, Turkey       | Local Investigator                                      |                                                                                            |
| Bengu Gulhan                      | Aydin      |                       |                  | Zonguldak Bülent Ecevit University Faculty of Medicine, Department of Anesthesiology and Reanimation, Department of Anesthesiology and Reanimation, Zonguldak Bülent Ecevit University Faculty of Medicine | Esenkoy, 67000 Zonguldak Merkez/Zonguldak, Turkey       | Local Investigator                                      |                                                                                            |
| Mehmet                            | Yavuz      |                       |                  | University of Health Sciences Izmir Tepecik Training and Research Hospital, Department of Intensive Care, Izmir Tepecik Training and Research Hospital, University of Health Sciences                      | Yenisehir, Gaziler Cd No:468, 35020 Konak/Izmir, Turkey | Local Investigator                                      |                                                                                            |

## Supplemental Online Content: Nonauthor Collaborators

\*First name, last name, and suffix (if applicable) are required and will appear in PubMed.

| *First Name and Middle Initial(s) | *Last Name    | *Suffix (eg, Jr, III) | Academic Degrees | Institution                                                                                                                                                                                              | Location (city, state/province, country)                                                                  | Role or Contribution, eg, chair, principal investigator | Group (if more than 1 Group listed in the byline) and/or Subgroup (eg, Steering Committee) |
|-----------------------------------|---------------|-----------------------|------------------|----------------------------------------------------------------------------------------------------------------------------------------------------------------------------------------------------------|-----------------------------------------------------------------------------------------------------------|---------------------------------------------------------|--------------------------------------------------------------------------------------------|
| Alev                              | Oztas         |                       |                  | University of Health Sciences Fatih Sultan Mehmet Education and Research Hospital, ICU, Department of Intensive Care, Fatih Sultan Mehmet Education and Research Hospital, University of Health Sciences | Icerenkoy, D100 Uzeri D:İ, 34752 Atasehir/Istanbul, Turkey                                                | Local Investigator                                      |                                                                                            |
| Nilgun                            | Kavrut Ozturk |                       |                  | University of Health Sciences Antalya Training and Research Hospital, Department of Anesthesiology and Reanimation, Antalya Training and Research Hospital, University of Health Sciences                | Varlik, Kazim Karabekir Cd., 07100 Muratpasa/Antalya, Turkey                                              | Local Investigator                                      |                                                                                            |
| Umut Sabri                        | Kasapoglu     |                       |                  | Malatya Training and Research Hospital, Department of Intensive Care, Malatya Training and Research Hospital                                                                                             | Ozalper, Kanal Boyu Cd. No:4, 44000 Yesilyurt/Malatya, Turkey                                             | Local Investigator                                      |                                                                                            |
| Hakan                             | Miniksar      |                       |                  | Yozgat Bozok University Faculty Of Medicine Department Of Anesthesiology And Reanimation, Department Of Anesthesiology And Reanimation, Faculty Of Medicine , Yozgat Bozok University                    | Capanoglu Mah. Cemil cicek Cad Bozok Universitesi, Ataturk Yolu 7. KM, 66100 Yozgat Merkez/Yozgat, Turkey | Local Investigator                                      |                                                                                            |



## Supplemental Online Content: Nonauthor Collaborators

\*First name, last name, and suffix (if applicable) are required and will appear in PubMed.

| *First Name and Middle Initial(s) | *Last Name | *Suffix (eg, Jr, III) | Academic Degrees | Institution                                                                                                                                                                                                                                              | Location (city, state/province, country)                                     | Role or Contribution, eg, chair, principal investigator | Group (if more than 1 Group listed in the byline) and/or Subgroup (eg, Steering Committee) |
|-----------------------------------|------------|-----------------------|------------------|----------------------------------------------------------------------------------------------------------------------------------------------------------------------------------------------------------------------------------------------------------|------------------------------------------------------------------------------|---------------------------------------------------------|--------------------------------------------------------------------------------------------|
| Eylem                             | Tuncay     |                       |                  | University of Health Sciences Sureyyapasa Chest Diseases and Thoracic Surgery Training and Research Hospital, Department of Intensive Care Sureyyapasa Chest Diseases and Thoracic Surgery Training and Research Hospital, University of Health Sciences | Basibuyuk, Hastane Yolu D:c blok, 34844 Maltepe/Istanbul, Turkey             | Local Investigator                                      |                                                                                            |
| Cenk                              | Indelen    |                       |                  | University of Health Sciences Kartal Kosuyolu High Speciality Educational and Research Hospital, Department Of Anesthesiology And Reanimation, Kartal Kosuyolu High Speciality Educational and Research Hospital, University of Health Sciences          | Cevizli, 2, Denizler Caddesi, Cevizli Kavsađı, 34865 Kartal/Istanbul, Turkey | Local Investigator                                      |                                                                                            |
| Halide                            | Ogus       |                       |                  | University of Health Sciences Kartal Kosuyolu High Speciality Educational and Research Hospital, Department Of Anesthesiology And Reanimation, Kartal Kosuyolu High Speciality Educational and Research Hospital, University of Health Sciences          | Cevizli, 2, Denizler Caddesi, Cevizli Kavsađı, 34865 Kartal/Istanbul, Turkey | Local Investigator                                      |                                                                                            |
| Basar                             | Erdivanli  |                       |                  | Recep Tayyip Erdogan University Medical Faculty, Department Of Anesthesiology And Reanimation, Medical Faculty Hospital, Recep Tayyip Erdogan University                                                                                                 | Islampasa Mahallesi.Sehitler Caddesi No.74 Rize, Turkey                      | Local Investigator                                      |                                                                                            |

## Supplemental Online Content: Nonauthor Collaborators

\*First name, last name, and suffix (if applicable) are required and will appear in PubMed.

| *First Name and Middle Initial(s) | *Last Name | *Suffix (eg, Jr, III) | Academic Degrees | Institution                                                                                                                                                                                                             | Location (city, state/province, country)                                     | Role or Contribution, eg, chair, principal investigator | Group (if more than 1 Group listed in the byline) and/or Subgroup (eg, Steering Committee) |
|-----------------------------------|------------|-----------------------|------------------|-------------------------------------------------------------------------------------------------------------------------------------------------------------------------------------------------------------------------|------------------------------------------------------------------------------|---------------------------------------------------------|--------------------------------------------------------------------------------------------|
| Ayca Sultan                       | Sahin      |                       |                  | University of Health Sciences Kanuni Sultan Süleyman Training and Research Hospital, Department Of Anesthesiology And Reanimation, Kanuni Sultan Süleyman Training and Research Hospital, University of Health Sciences | Atakent Mh, Turgut Ozal Bulvari No:46/1, 34303 Kucukcekmece/Istanbul, Turkey | Local Investigator                                      |                                                                                            |
| Mehmet                            | Yilmaz     |                       |                  | University of Health Sciences Derince Training and Research Hospital, Department Of Anesthesiology And Reanimation, Derince Training and Research Hospital, University of Health Sciences                               | Ibnisina, Lojman Sk., 41900 Derince/Kocaeli, Turkey                          | Local Investigator                                      |                                                                                            |
| Erken                             | Sayan      |                       |                  | University of Health Sciences Bursa Yuksek Ihtisas Training and Research Hospital, Department Of Anesthesiology And Reanimation, Bursa Yuksek Ihtisas Training and Research Hospital, University of Health Sciences     | Mimarsinan Mah. Emniyet Cad. 16310 Yildirim/Bursa, Turkey                    | Local Investigator                                      |                                                                                            |
| Canan                             | Yilmaz     |                       |                  | University of Health Sciences Bursa Yuksek Ihtisas Training and Research Hospital, Department Of Anesthesiology And Reanimation, Bursa Yuksek Ihtisas Training and Research Hospital, University of Health Sciences     | Mimarsinan Mah. Emniyet Cad. 16310 Yildirim/Bursa, Turkey                    | Local Investigator                                      |                                                                                            |

## Supplemental Online Content: Nonauthor Collaborators

\*First name, last name, and suffix (if applicable) are required and will appear in PubMed.

| *First Name and Middle Initial(s) | *Last Name | *Suffix (eg, Jr, III) | Academic Degrees | Institution                                                                                                                                                                                           | Location (city, state/province, country)                                                         | Role or Contribution, eg, chair, principal investigator | Group (if more than 1 Group listed in the byline) and/or Subgroup (eg, Steering Committee) |
|-----------------------------------|------------|-----------------------|------------------|-------------------------------------------------------------------------------------------------------------------------------------------------------------------------------------------------------|--------------------------------------------------------------------------------------------------|---------------------------------------------------------|--------------------------------------------------------------------------------------------|
| Senay                             | Goksu      |                       |                  | University of Health Sciences Umraniye Training and Research Hospital, Department Of Anesthesiology And Reanimation, Ümraniye Training and Research Hospital, University of Health Sciences           | Elmalikent, Adem Yavuz Cd., 34764 Umraniye/Istanbul, Turkey                                      | Local Investigator                                      |                                                                                            |
| Betul                             | Basaran    |                       |                  | Konya Training and Research Hospital, Department Of Anesthesiology And Reanimation, Konya Training and Research Hospital                                                                              | Ayanbey Mah.Yeni Meram Cad.No:97 Konya, Turkey                                                   | Local Investigator                                      |                                                                                            |
| Emine                             | Kutahya    |                       |                  | Konya Training and Research Hospital, Department Of Anesthesiology And Reanimation, Konya Training and Research Hospital                                                                              | Ayanbey Mah.Yeni Meram Cad.No:97 Konya, Turkey                                                   | Local Investigator                                      |                                                                                            |
| Ayfer Kaya                        | Gok        |                       |                  | University of Health Sciences Gaziosmanpasa Training and Research Hospital, Department Of Anesthesiology And Reanimation, Gaziosmanpasa Training and Research Hospital, University of Health Sciences | Karayollari, Osmanbey Cd. 621 Sokak, 34255 Gaziosmanpasa/Istanbul, Turkey                        | Local Investigator                                      |                                                                                            |
| Ayse                              | Ozcan      |                       |                  | University of Health Sciences Ankara Training and Research Hospital, Department Of Anesthesiology And Reanimation, Ankara Training and Research Hospital, University of Health Sciences               | Ankara Egitim ve Arastirma Hastanesi Hacettepe Mh. Ulucanlar Cd. No:89 Altindag / ANKARA, Turkey | Local Investigator                                      |                                                                                            |

## Supplemental Online Content: Nonauthor Collaborators

\*First name, last name, and suffix (if applicable) are required and will appear in PubMed.

| *First Name and Middle Initial(s) | *Last Name | *Suffix (eg, Jr, III) | Academic Degrees | Institution                                                                                                                                                                                                              | Location (city, state/province, country)                                           | Role or Contribution, eg, chair, principal investigator | Group (if more than 1 Group listed in the byline) and/or Subgroup (eg, Steering Committee) |
|-----------------------------------|------------|-----------------------|------------------|--------------------------------------------------------------------------------------------------------------------------------------------------------------------------------------------------------------------------|------------------------------------------------------------------------------------|---------------------------------------------------------|--------------------------------------------------------------------------------------------|
| Iskender                          | Kara       |                       |                  | Selcuk University Medical Faculty, Department Of Anesthesiology And Reanimation, Medical Faculty, Selcuk University                                                                                                      | Ardicli, Akademi, Celal Bayar Cd. No:313, 42250 Selcuklu/Konya, Turkey             | Local Investigator                                      |                                                                                            |
| Seyfi                             | Kartal     |                       |                  | University of Health Sciences Trabzon Kanuni Training and Research Hospital, Department Of Anesthesiology And Reanimation, Trabzon Kanuni Training and Research Hospital, University of Health Sciences                  | Kasustu Mah. Topal Osman Cad. No: 7 Yomra / TRABZON, Turkey                        | Local Investigator                                      |                                                                                            |
| Kemal Tolga                       | Saracoglu  |                       |                  | University of Health Sciences Kartal Dr. Lutfi Kirdar Training and Research Hospital, Department Of Anesthesiology And Reanimation, University of Health Sciences Kartal Dr. Lutfi Kirdar Training and Research Hospital | Cevizli, D-100 Guney Yanyol, Cevizli Mevkii No:47, 34865 Kartal/Istanbul, Turkey   | Local Investigator                                      |                                                                                            |
| Yeliz                             | Bilir      |                       |                  | University of Health Sciences Kartal Dr. Lutfi Kirdar Training and Research Hospital, Department Of Anesthesiology And Reanimation, University of Health Sciences Kartal Dr. Lutfi Kirdar Training and Research Hospital | Cevizli, D-100 Guney Yanyol, Cevizli Mevkii No:47, 34865 Kartal/Istanbul, Turkey   | Local Investigator                                      |                                                                                            |
| Selin                             | Eyupoglu   |                       |                  | Giresun University Medical Faculty, Department of Intensive Care, Medical Faculty , Giresun University                                                                                                                   | Merkez, Teyyareduzu Mah, Ataturk Blv. No:323, 28200 Giresun Merkez/Giresun, Turkey | Local Investigator                                      |                                                                                            |

## Supplemental Online Content: Nonauthor Collaborators

\*First name, last name, and suffix (if applicable) are required and will appear in PubMed.

| *First Name and Middle Initial(s) | *Last Name    | *Suffix (eg, Jr, III) | Academic Degrees | Institution                                                                                                                                                                                                             | Location (city, state/province, country)                             | Role or Contribution, eg, chair, principal investigator | Group (if more than 1 Group listed in the byline) and/or Subgroup (eg, Steering Committee) |
|-----------------------------------|---------------|-----------------------|------------------|-------------------------------------------------------------------------------------------------------------------------------------------------------------------------------------------------------------------------|----------------------------------------------------------------------|---------------------------------------------------------|--------------------------------------------------------------------------------------------|
| Nigar                             | Ertugrul Oruc |                       |                  | S.B.U. Diskapi Yildirim Beyazit Training and Research Hospital- Ankara, Department Of Anesthesiology And Reanimation, Diskapi Yildirim Beyazit Training and Research Hospital, University of Health Sciences            | Ziraat, Sht. Omer Halisdemir Blv No:1, 06110 Altindag/Ankara, Turkey | Local Investigator                                      |                                                                                            |
| Kubilay                           | Issever       |                       |                  | Ministry of Health Sakarya Training and research Hospital, Department of Intensive Care, Sakarya Training and research Hospital, Ministry of Health/ Giresun University Medical Faculty Department of Internal Medicine | Adnan Menderes Caddesi Saglik Sokak No: 195 Adapazari, Turkey        | Local Investigator                                      |                                                                                            |
| Jamie                             | Patel         |                       |                  | Warwick Hospital, Warwick Hospital                                                                                                                                                                                      | Lakin Road, Warwick, United Kingdom                                  | Local Investigator                                      |                                                                                            |
| Jayson                            | Clarke        |                       |                  | Lewisham and Greenwich NHS Trust, University Hospital Lewisham                                                                                                                                                          | Lewisham High Street, London, United Kingdom                         | Local Investigator                                      |                                                                                            |
| Louise                            | Ma            |                       |                  | Whittington Health, Whittington Hospital                                                                                                                                                                                | Magdala Avenue, London, United Kingdom                               | Local Investigator                                      |                                                                                            |
| Tom                               | Lawton        |                       |                  | Bradford Teaching Hospitals, Bradford Teaching Hospitals NHS Foundation Trust                                                                                                                                           | Bradford Royal Infirmary, Duckworth Lane, Bradford, United Kingdom   | Local Investigator                                      |                                                                                            |
| Brendan                           | Sloan         |                       |                  | Mid Yorkshire Hospitals NHS Trust, Mid Yorkshire Hospitals NHS Trust                                                                                                                                                    | Pinderfields Hospital, Wakefield, United Kingdom                     | Local Investigator                                      |                                                                                            |

## Supplemental Online Content: Nonauthor Collaborators

\*First name, last name, and suffix (if applicable) are required and will appear in PubMed.

| *First Name and Middle Initial(s) | *Last Name | *Suffix (eg, Jr, III) | Academic Degrees | Institution                                                                                            | Location (city, state/province, country)                                                  | Role or Contribution, eg, chair, principal investigator | Group (if more than 1 Group listed in the byline) and/or Subgroup (eg, Steering Committee) |
|-----------------------------------|------------|-----------------------|------------------|--------------------------------------------------------------------------------------------------------|-------------------------------------------------------------------------------------------|---------------------------------------------------------|--------------------------------------------------------------------------------------------|
| Santhana                          | Kannan     |                       |                  | SWBH Birmingham, City Hospital                                                                         | Sandwell and West Birmingham Hospitals NHS Trust, Dudley Road, Birmingham, United Kingdom | Local Investigator                                      |                                                                                            |
| Richard                           | Innes      |                       |                  | Somerset FT, Taunton and Somerset NHS Foundation Trust                                                 | Musgrove Park Hospital, Parkfield Drive, Taunton, United Kingdom                          | Local Investigator                                      |                                                                                            |
| Mark                              | Carpenter  |                       |                  | South Tyneside and Sunderland NHS Foundation Trust, South Tyneside and Sunderland NHS Foundation Trust | Kayll Road, Sunderland, United Kingdom                                                    | Local Investigator                                      |                                                                                            |
| Luke                              | Newey      |                       |                  | Swansea Bay University Health Board, Morriston Hospital                                                | Swansea, United Kingdom                                                                   | Local Investigator                                      |                                                                                            |
| Hazem                             | Alwagih    |                       |                  | Barnsley Hospital NHS Foundation Trust, Barnsley Hospital                                              | Foundation Block 2, Pogmoor Road Entrance, Barnsley, United Kingdom                       | Local Investigator                                      |                                                                                            |
| Chris                             | Acott      |                       |                  | Oxford John Radcliffe Hospital, Oxford University Hospitals NHS Foundation                             | John Radcliffe Hospital, Oxford, United Kingdom                                           | Local Investigator                                      |                                                                                            |
| Anil                              | Hormis     |                       |                  | The Rotherham NHS Foundation Trust, The Rotherham NHS Foundation Trust                                 | Moorgate Road, Rotherham, United Kingdom                                                  | Local Investigator                                      |                                                                                            |
| James                             | Herdman    |                       |                  | Neuro ICU Oxford John Radcliffe Hospital, Oxford University Hospitals NHS Foundation                   | John Radcliffe Hospital, Oxford, United Kingdom                                           | Local Investigator                                      |                                                                                            |
| Osama                             | Akrama     |                       |                  | Royal Berkshire Hospital, Royal Berkshire Hospital NHS Foundation Trust                                | London Road, Reading, Berkshire, United Kingdom                                           | Local Investigator                                      |                                                                                            |

Supplemental Online Content: Nonauthor Collaborators

\*First name, last name, and suffix (if applicable) are required and will appear in PubMed.

| *First Name and Middle Initial(s) | *Last Name | *Suffix (eg, Jr, III) | Academic Degrees | Institution                                                                                                                                                                                                                                                                                                                                                                                                                    | Location (city, state/province, country)           | Role or Contribution, eg, chair, principal investigator | Group (if more than 1 Group listed in the byline) and/or Subgroup (eg, Steering Committee) |
|-----------------------------------|------------|-----------------------|------------------|--------------------------------------------------------------------------------------------------------------------------------------------------------------------------------------------------------------------------------------------------------------------------------------------------------------------------------------------------------------------------------------------------------------------------------|----------------------------------------------------|---------------------------------------------------------|--------------------------------------------------------------------------------------------|
| Rachel                            | Baumber    |                       |                  | Royal national Orthopaedic Hospital , Royal National Orthopaedic Hospital NHS Trust                                                                                                                                                                                                                                                                                                                                            | Brockley Hill, Stanmore, Middlesex, United Kingdom | Local Investigator                                      |                                                                                            |
| Olena                             | Khomenko   |                       |                  | O.O. Shalimov Nat. Institute of Surgery and Transplantology, Nat. Ac. of Med. Sciences of Ukraine, State Institution O.O.Shalimov National Institute of Surgery and Transplantology of National Academy of Medical Sciences of Ukraine, Dept of Anaesthesiology & Intensive Care; Bogomolets National Medical University, Department of Surgery, anaesthesiology and intensive care of the institute of postgraduate education | Heroiv Sevastopolia, 30 Kyiv, Ukraine              | Local Investigator                                      |                                                                                            |
| Akram                             | Khan       |                       |                  | Oregon Health and Science University, Oregon Health & Science University                                                                                                                                                                                                                                                                                                                                                       | Oregon, Portland, USA                              | Local Investigator                                      |                                                                                            |
| Zubair                            | Hasan      |                       |                  | Northwell EDU, Division of Pulmonary, Critical Care, and Sleep Medicine, Department of Medicine, Donald and Barbara Zucker School of Medicine at Hofstra/Northwell                                                                                                                                                                                                                                                             | New Hyde Park, New York, USA                       | Local Investigator                                      |                                                                                            |
| Jay S.                            | Raval      |                       |                  | university of new mexico school of medicine, University of New Mexico School of Medicine                                                                                                                                                                                                                                                                                                                                       | Albuquerque, New Mexico, USA                       | Local Investigator                                      |                                                                                            |

Supplemental Online Content: Nonauthor Collaborators

\*First name, last name, and suffix (if applicable) are required and will appear in PubMed.

| <b>*First Name and Middle Initial(s)</b> | <b>*Last Name</b> | <b>*Suffix (eg, Jr, III)</b> | Academic Degrees | Institution                                                                                                                     | Location (city, state/province, country) | Role or Contribution, eg, chair, principal investigator | Group (if more than 1 Group listed in the byline) and/or Subgroup (eg, Steering Committee) |
|------------------------------------------|-------------------|------------------------------|------------------|---------------------------------------------------------------------------------------------------------------------------------|------------------------------------------|---------------------------------------------------------|--------------------------------------------------------------------------------------------|
| Lauren                                   | Sutherland        |                              |                  | Columbia University, Department of Anesthesiology, Columbia University Medical Center, New York City, United States of America. | New York City, New York, USA             | Local Investigator                                      |                                                                                            |
