# Supplementary material
Source: PubMed Central journal article supplement (PMC10570913)
Supplement: jama-e2320737-s004.pdf [file jama-e2320737-s004.pdf]

## Data Sharing Statement

Raasveld. Red Blood Cell Transfusion in the Intensive Care Unit. *JAMA*. Published October 12, 2023. doi:10.1001/jama.2023.20737

### Data

**Data available:** No

### Additional Information

**Explanation for why data not available:** As described in the supplementary materials, sub-studies or secondary analyses can be requested by following the procedure as stated. Reasonable data request will be taken in consideration. Additional, related documents can be requested separately.
